# Supplementary material for: A mass spectrometry guided approach for the identification of novel vaccine candidates in gram-negative pathogens
Source: PubMed Central journal article supplement (PMC6874673; doi:10.1038/s41598-019-53493-8), 2019-11-22
Supplement: 41598_2019_53493_MOESM1_ESM.pdf [file 41598_2019_53493_MOESM1_ESM.pdf]

## A mass spectrometry guided approach for the identification of novel vaccine candidates in gram-negative pathogens

Daniel Hornburg<sup>2,5‡</sup>, Tobias Kruse<sup>1,3‡</sup>, Florian Aderl<sup>1,3</sup>, Christina Daschkin<sup>1</sup>, Raphaela P. Semper<sup>1,6</sup>, Kathrin Klar<sup>3</sup>, Anna Guenther<sup>4</sup>, Raquel Mejías-Luque<sup>1,6</sup>, Nicole Schneiderhan-Marra<sup>4</sup>, Matthias Mann<sup>2</sup>, Felix Meissner<sup>2‡\*</sup>, Markus Gerhard<sup>1,3,6‡\*</sup>

### Affiliations:

<sup>1</sup> Institut für Medizinische Mikrobiologie, Immunologie und Hygiene, Technische Universität München; Munich, Germany.

<sup>2</sup> Max-Planck-Institute for Biochemistry, Martinsried, Germany

<sup>3</sup> ImevaX GmbH, Munich, Germany

<sup>4</sup> Naturwissenschaftliches und Medizinisches Institut, Tübingen, Germany

<sup>5</sup> present address: Stanford University, School of Medicine, USA

<sup>6</sup> German Center for infection research, partner site Munich

‡ These authors contributed equally to this work

\* Correspondence to: [markus.gerhard@tum.de](mailto:markus.gerhard@tum.de), [meissner@biochem.mpg.de](mailto:meissner@biochem.mpg.de)

## Supplementary Information

### Supplementary Figure 1

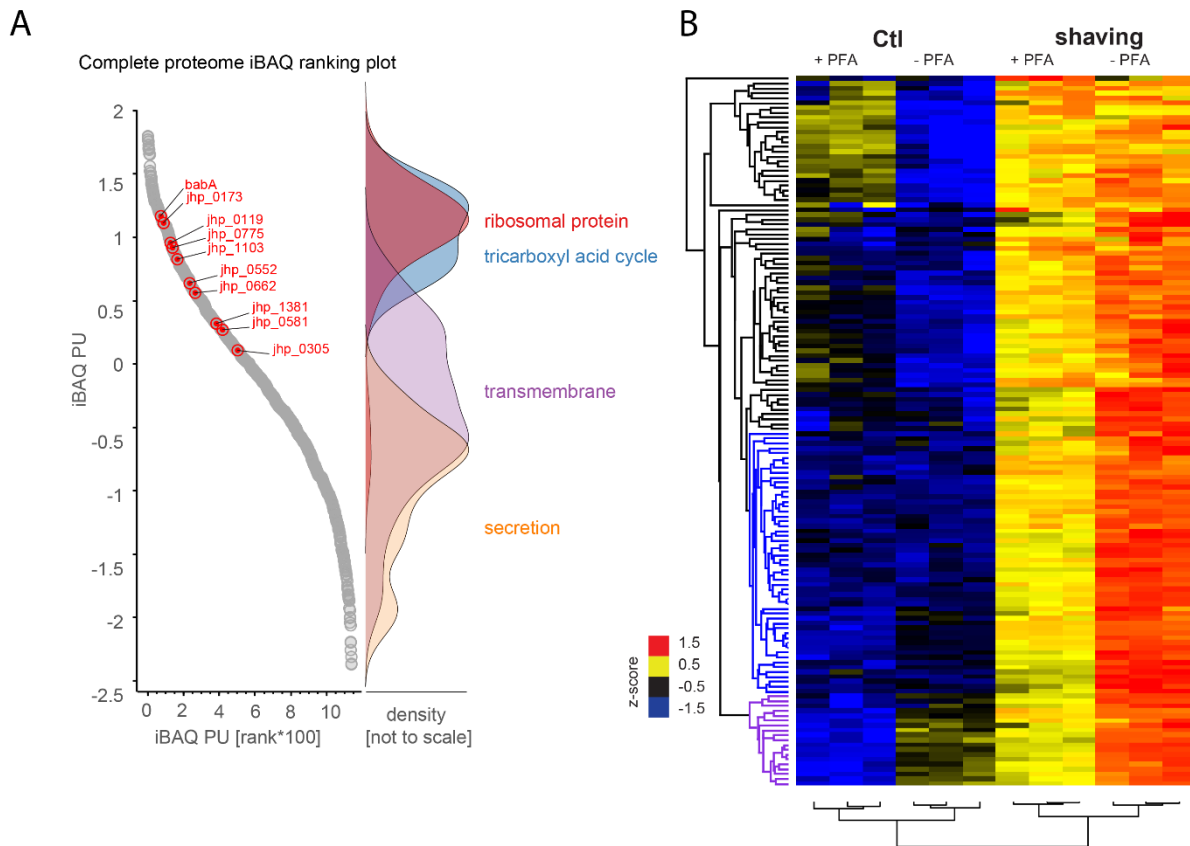

#### Supplementary Figure 1 | Abundance profile of vaccine candidates in the entire *H. pylori* proteome

**A) Complete Proteome Analysis:** To visualize the composition of the total *H. pylori* (J99) (median of unfixed total proteome samples, median of at least 2 valid values) proteome, log<sub>10</sub> protein abundances (size normalized intensities: iBAQ (iBAQ (Schwanhausser et al., 2011))) are plotted against their abundance rank. Quantified proteins span more than 4 orders of magnitude. Candidate proteins, known survival and adhesion factors are indicated in red. The density distribution (scale normalized) shows the distribution of proteins belonging to housekeeping molecular processes (ribosomal proteins and tricarboxylic acid cycle, red and blue) as well as transmembrane (pink) and secretion (yellow). **B) Surfome of *H. pylori*:** 146 proteins that correlate with the trypsin shaving time course. Median of replicates was z-scored and plotted after performing K-means hierarchical clustering.

## Supplementary Figure 2

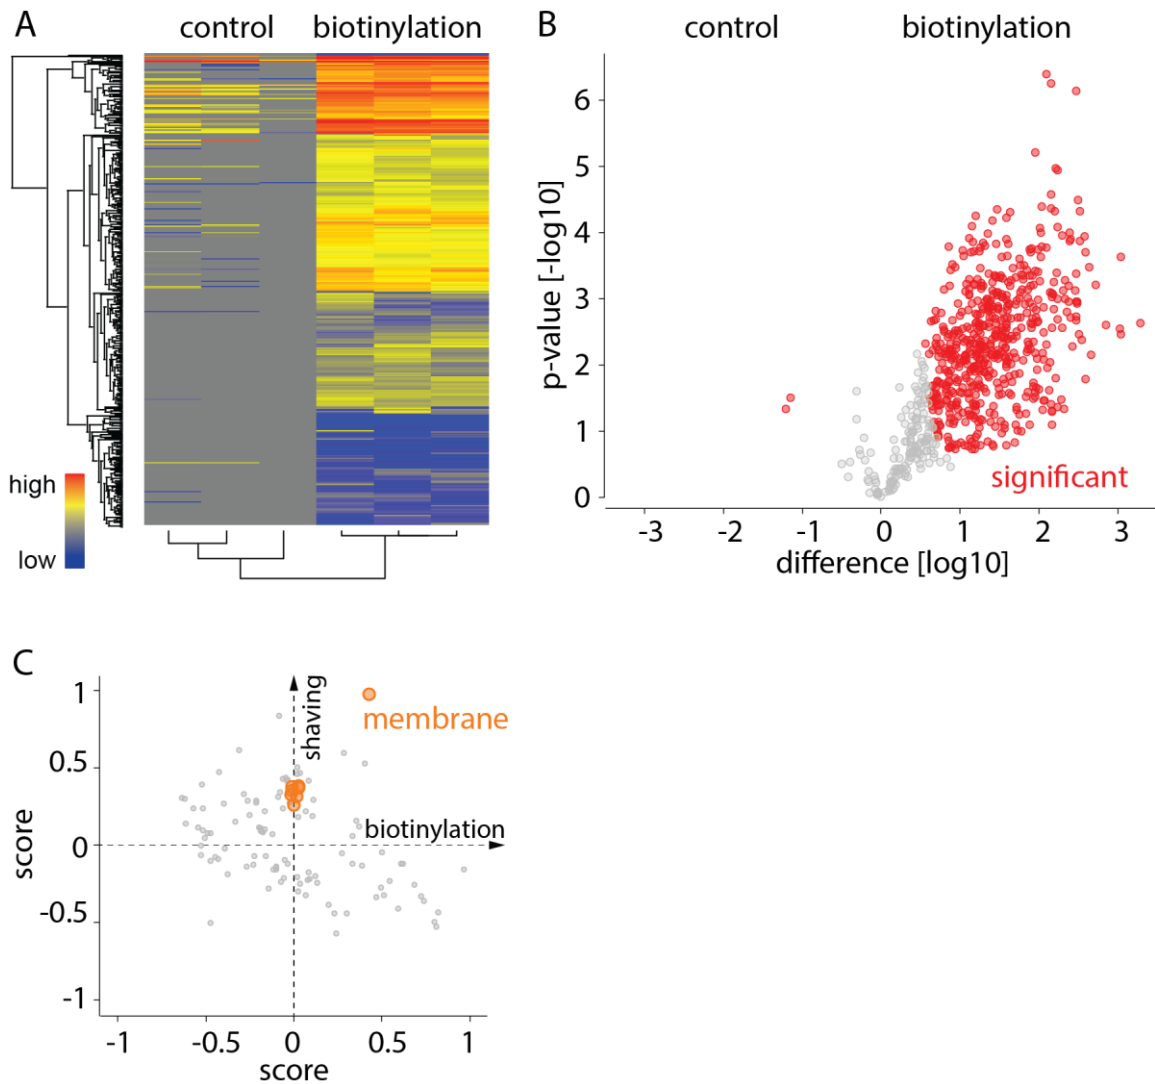

### Supplementary Figure 2 | Mapping of surface associated proteins via biotinylation.

**A)** Heat map indicating 712 proteins identified by using biotinylation and biotin enrichment to map the surface of *H. pylori*. **B)** T-test comparison visualized as a volcano plot showing differential abundance of proteins in the biotinylation control compared to the biotinylation pull-down, 565 proteins were significantly enriched (Welch's t-test, FDR 5%,  $S_0=1$ ). **C)** Comparison of surfome shaving and biotinylation for enriched annotations: 2D enrichment of categorical annotations (see supplementary table biotinylation 2D) based on the t-test difference comparing biotinylation (x axis, biotinylation vs control) and one surfome shaving condition (trypsin treatment (PFA) after 10 min vs control (PFA) after 10 min). Positive scores denote enrichments ( $p$ -value < 0.05) and orange circles indicate membrane annotations.

Supplementary Figure 3

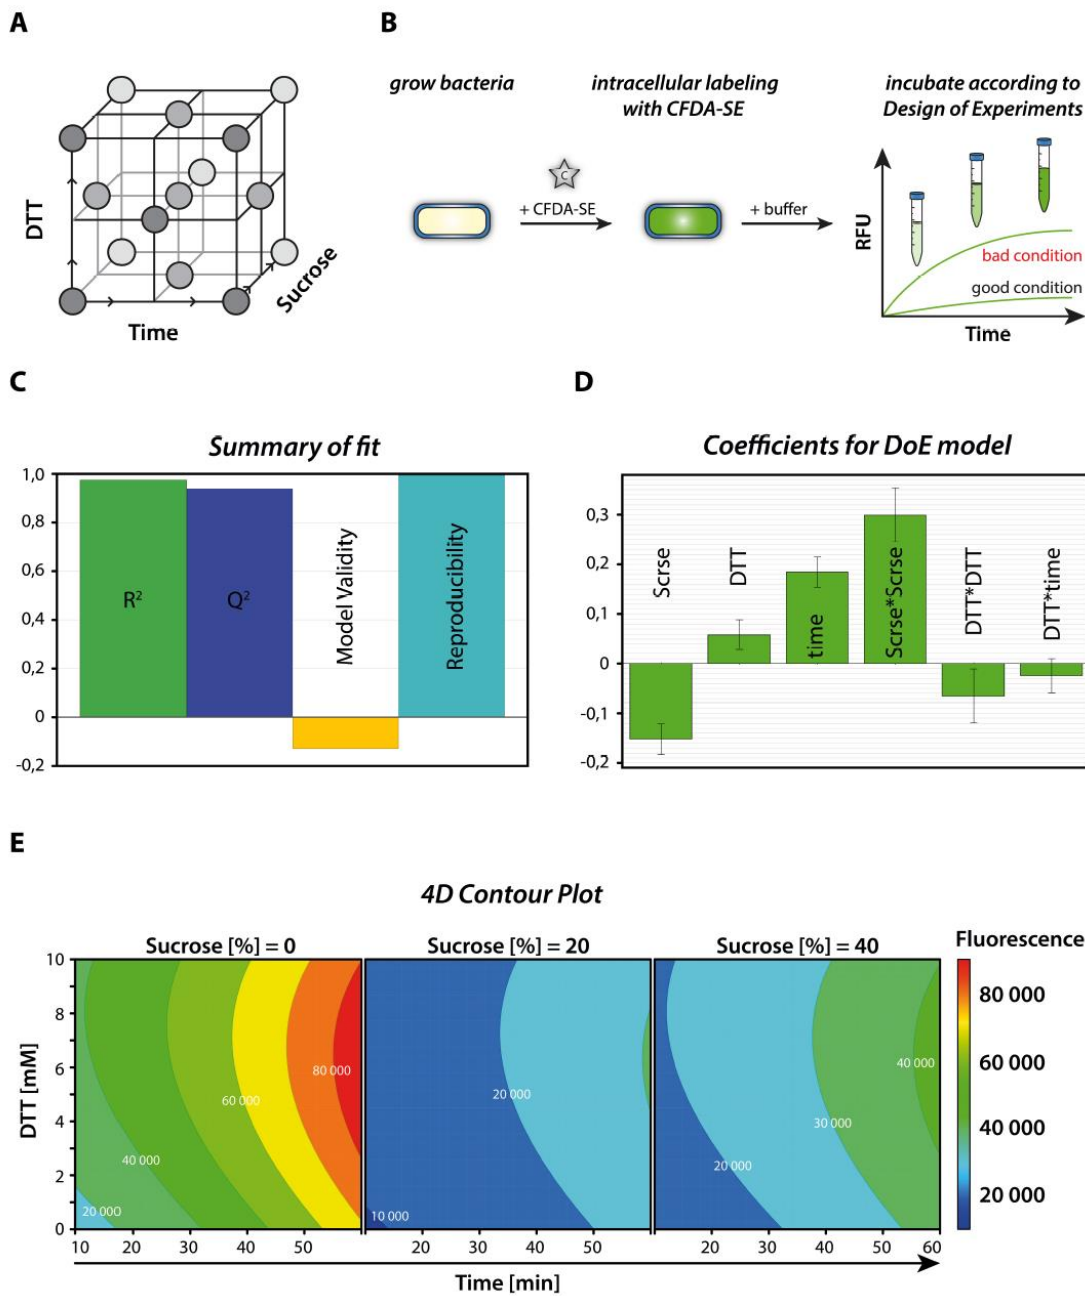

Supplementary Figure 3 | **Design of Experiment (DoE) to optimize the shaving conditions for gram-negative bacteria.**

To optimize the shaving buffer composition, fluorescently labeled *E. coli* were incubated in different buffer conditions according to a design of experiments (DoE) approach. Then, the fluorescence of the supernatant was measured and evaluated by the DoE software MODDE (Umetrics). The DoE objective was optimization with the recommended design (CCF, star distance = 1), running 19 experiments with 5 center points. Quadratic Modeling was used to quantify linear, pairwise and quadratic interactions of the variables. **A)** Concentrations of DTT, time and sucrose were varied, covering the entire experimental space in high and low combinations. **B)** Bacteria were labeled with CFDA-SE, and thus, proteins in the cytoplasm labeled fluorescently. Upon incubation, autolysis is measured by an increase of fluorescence intensity in the supernatant. **C)** The DoE data were fitted and evaluated, showing the quality parameters  $Q^2$  (green),  $R^2$  (blue), model validity (yellow) and

reproducibility (turquoise). **D)** After removing non-significant terms, the fitting equation is only comprised of variables influencing the readout significantly. Linear terms are represented by single expressions (e.g. DTT), pairwise interactions by multiplication of two separate terms (e.g. DTT\*t) and quadratic interactions by multiplication of the same term (e.g. scrse\*scrse). **E)** A 4-D contour plot visualization of the fitted fluorescence data after processing the DoE model.

## Supplementary Figure 4

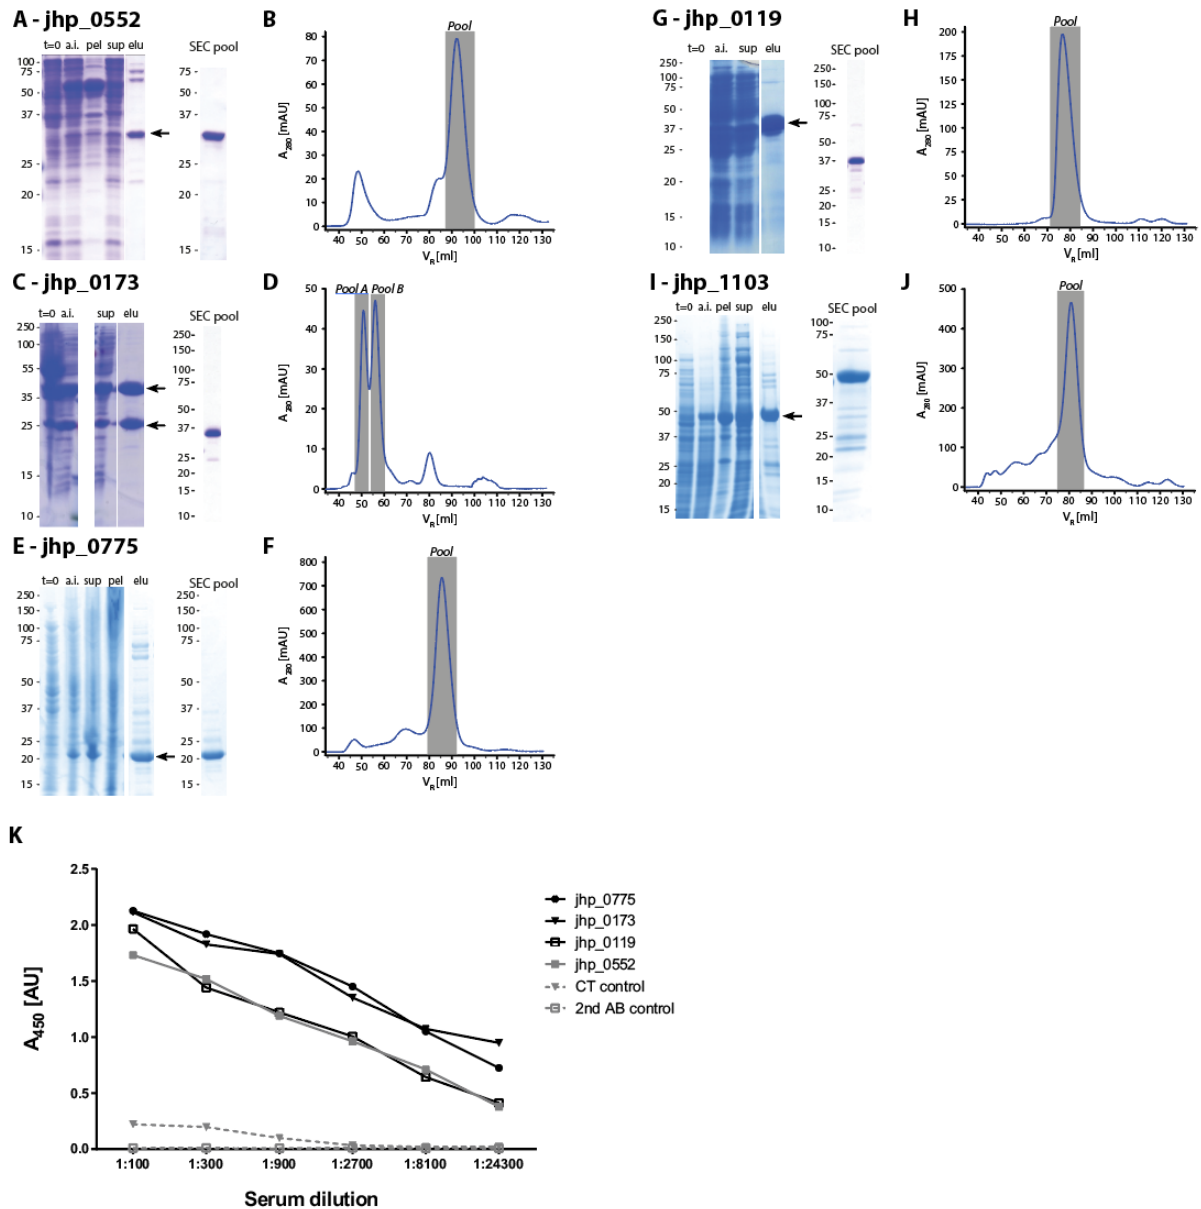

### Supplementary Figure 4 | Protein production and generation of protein specific antisera.

Proteins were recombinantly produced in *E. coli* BL21(DE3) and purified by NiNTA and size exclusion chromatography (SEC). SDS page analysis and SEC elution profiles are depicted for jhp\_0552 (A, B), jhp\_0173 (C, D), jhp\_0775 (E, F), jhp\_0119 (G, H) as well as jhp\_1103 (I, J). SEC pooled fractions are highlighted in the chromatogram (grey) and the final pool analyzed by SDS-PAGE.

**K**) ELISA using antisera raised against the vaccine candidates. The IgG fraction was purified and used to stain the surface of CFDA-SE labeled *H. pylori*. The reactivity of the anti-vaccine candidate immune sera against their corresponding antigen is shown.

## Supplementary Figure 5

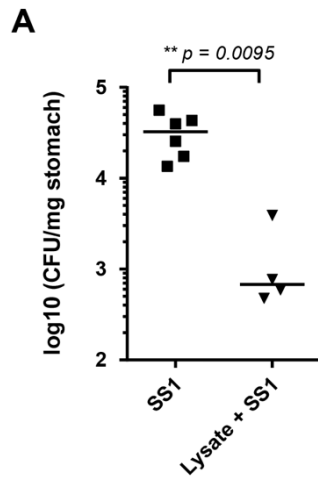

### Supplementary Figure 5 | Immunization of *H. pylori* infected mice with *H. pylori* lysate.

**A)** Mice were infected with *H. pylori* SS1 and immunized mice with cholera toxin (CT) alone or in combination with *H. pylori* lysate. Gastric *H. pylori* colonization was determined and depicted as CFU per mg stomach.

## Supplementary Figure 6

**A**

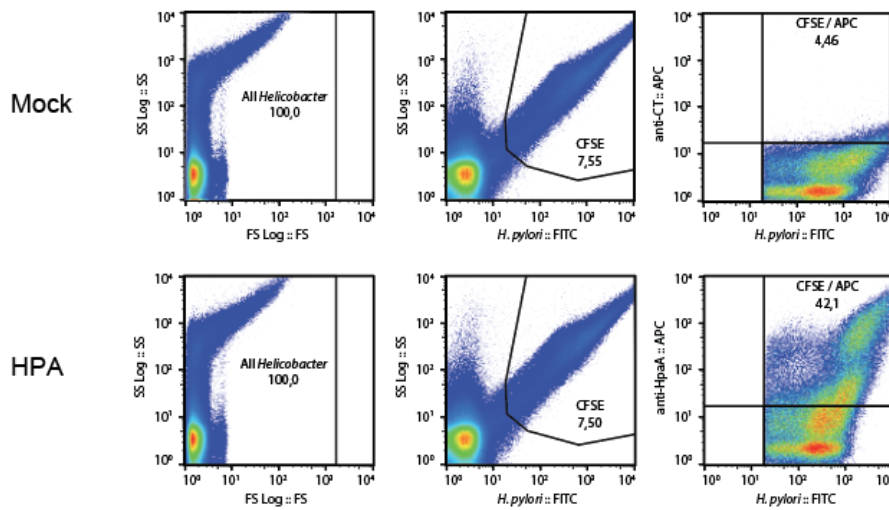

**B**

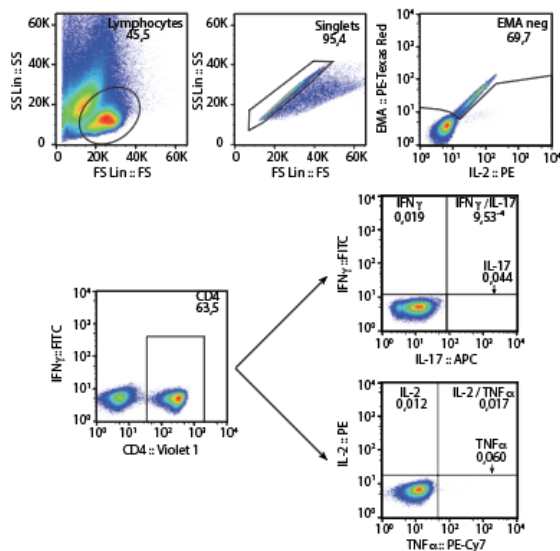

**C**

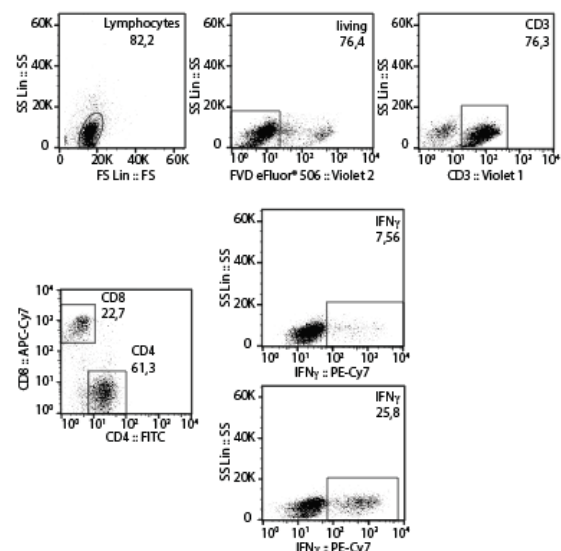

### Supplementary Figure 6 | Gating strategies for flow cytometry analysis.

**A)** Representative density plots of the gating strategy to detect CFDA-SE labeled *H. pylori* stained with antisera raised against vaccine candidates. Staining with antibodies derived from mock immunized (CT control) and HPA immunized (HPA) mice are shown. **B)** Mouse splenocytes were stimulated with jhp\_0775, stained and analyzed by flow cytometry. Representative density plots from the ICS gating strategy are shown, gating on living single lymphocytes (upper panel) and measuring the frequencies of IFN $\gamma$  and IL-17 (middle-right plot) as well as IL-2 and TNF $\alpha$  (lower-right plot) producing CD4 $^+$  T cells (lower-left plot). **C)** Human PBMCs were stimulated with PMA/Ionomycin, stained and analyzed by flow cytometry. Representative dot plots from the ICS gating strategy are shown, gating on CD3 $^+$  living lymphocytes (upper panel) and measuring the frequencies of IFN $\gamma$  producing CD8 $^+$  (middle-right plot) and CD4 $^+$  cells (lower-right plot).



suppl HP homology of 22 final candidates

| Gene name | HP 26695 | HP J99 | HP G27   | HP P12   | HP B38   | HP 908   | HP SJM180 | HP PeCan4 | HP India7 |
|-----------|----------|--------|----------|----------|----------|----------|-----------|-----------|-----------|
| jhp_1276  | 0,97619  | 1      | 0,97619  | 0,964286 | 0,97619  | 0,97619  | 0,9761904 | 0,9401197 | 0,97619   |
| jhp_0776  | 0,965854 | 1      | 0,965854 | 0,97561  | 0,965854 | 0,990244 | 0,9853659 | 0,9658536 | 0,965854  |
| jhp_0718  | 0,923077 | 1      | 0,925926 | 0,927739 | 0,955711 | 0,979021 | 0,9370629 | 0,9324009 | 0,916667  |
| jhp_0552  | 0,983229 | 1      | 0,964361 | 0,987421 | 0,981132 | 0,951782 | 0,932914  | 0,932914  | 0,960168  |
| jhp_0530  | 0,900356 | 1      | 0,865772 | 0,836178 | 0,87372  | 0,992883 | 0,9726962 | 0,9209622 | 0,933333  |
| jhp_0501  | 0,866044 | 1      | 0,900312 | 0,931464 | 0,890966 | 0        | 0,9320987 | 0,8425926 | 0         |
| cagN      | 0,95098  | 1      | 0,95098  | 0,941177 | 0        | 0,960784 | 0,9869281 | 0,9339934 | 0,947712  |
| orf17     | 0,992064 | 1      | 0,996032 | 0,984127 | 0        | 0,984127 | 0,9960318 | 0,9920635 | 0,984127  |
| orf8      | 0,939709 | 1      | 0,933472 | 0,931393 | 0        | 0,968815 | 0,9355509 | 0,9480249 | 0,929019  |
| orf6      | 0,956522 | 1      | 0,956522 | 0,947826 | 0        | 0,982609 | 0,9478261 | 0,9652174 | 0,965217  |
| jhp_0444  | 0,917266 | 1      | 0,902878 | 0,884892 | 0,902878 | 0,953901 | 0,8127208 | 0,822695  | 0,899281  |
| jhp_0369  | 0,926056 | 1      | 0,911439 | 0,929825 | 0,915493 | 0,982456 | 0,9333333 | 0,90625   | 0,929825  |
| jhp_0173  | 0,876405 | 1      | 0,895911 | 0,914498 | 0,883895 | 0,977695 | 0,8884758 | 0,8689138 | 0,88015   |
| jhp_0136  | 0,941177 | 1      | 0,941177 | 0,897059 | 0,911765 | 0,970588 | 0,9558824 | 0,9411765 | 0,941177  |
| lpp20     | 1        | 1      | 0,994286 | 0,994286 | 0,988571 | 0,994286 | 0,9942857 | 0,9942857 | 0,977143  |
| jhp_1355  | 0,97093  | 1      | 0,974359 | 0,974359 | 0,974359 | 1        | 0,974359  | 0,974359  | 0,964103  |
| babB      | 0,891243 | 1      | 0,894817 | 0,922078 | 0,655496 | 0        | 0,898017  | 0,8799415 | 0,89548   |
| jhp_1103  | 0,881435 | 1      | 0,892356 | 0,866044 | 0,712698 | 0,879418 | 0,8796875 | 0,8367029 | 0,73817   |
| babA      | 0,93588  | 1      | 0,922043 | 0,922043 | 0,899464 | 0,812766 | 0,850067  | 0,8230563 | 0,895722  |
| jhp_0775  | 0,985075 | 1      | 0,97537  | 0,9801   | 0,985222 | 0,995025 | 0,9950249 | 1         | 0,99005   |
| Cag_14    | 0,562014 | 1      | 0,224324 | 0,8606   | 0,242021 | 0,978836 | 0,9600219 | 0,8387097 | 0,618533  |
| jhp_0119  | 0,940559 | 1      | 0,923077 | 0,933798 | 0,947552 | 0,988142 | 0,9754386 | 0,916955  | 0,891608  |

suppl HP homology of 22 final candidates

| Gene name | HP Lithuania75 | HP Gambia94/24 | HP 2018  | HP 2017  | HP ELS37 | HP HUP-B14 | HP NQ4200 |
|-----------|----------------|----------------|----------|----------|----------|------------|-----------|
| jhp_1276  | 0,9761904      | 0,9821429      | 0,97619  | 0,97619  | 0,97619  | 0,9821429  | 0,9760479 |
| jhp_0776  | 0,9658536      | 0,9804878      | 0,990244 | 0,990244 | 0,980488 | 0,9658536  | 0,9756098 |
| jhp_0718  | 0,9300699      | 0,9627039      | 0,979021 | 0,979021 | 0,93911  | 0,9370629  | 0,9370629 |
| jhp_0552  | 0,9559748      | 0,951782       | 0,951782 | 0,951782 | 0,991614 | 0,9832285  | 0,9827957 |
| jhp_0530  | 0,9146758      | 0,9583333      | 0,992883 | 0,992883 | 0,921708 | 0,8958333  | 0,9010239 |
| jhp_0501  | 0,8796296      | 0,9688473      | 0,941358 | 0,941358 | 0        | 0,904321   | 0,9259259 |
| cagN      | 0,9477124      | 0,9738562      | 0,957516 | 0,957516 | 0,96732  | 0,9509804  | 0,9705882 |
| orf17     | 0,984127       | 0,9801587      | 0,984127 | 0,984127 | 0,992064 | 0,9801587  | 0,9960318 |
| orf8      | 0,929314       | 0,972973       | 0,970894 | 0,970894 | 0,933472 | 0,9313929  | 0,968815  |
| orf6      | 0,9565217      | 0,9826087      | 0,982609 | 0,982609 | 0,973913 | 0,973913   | 0,9558824 |
| jhp_0444  | 0,9028777      | 0,9539007      | 0,957447 | 0,957447 | 0,910394 | 0,9064748  | 0,9107143 |
| jhp_0369  | 0,9357143      | 0,9964913      | 0,982456 | 0,982456 | 0,905263 | 0,9578947  | 0,9473684 |
| jhp_0173  | 0,8981132      | 0,9739777      | 0,977695 | 0,977695 | 0,973283 | 0,9213483  | 0,8838952 |
| jhp_0136  | 0,9264706      | 0,9705882      | 0,970588 | 0,970588 | 0,941177 | 0,9411765  | 0,9558824 |
| lpp20     | 0,9885714      | 0,9885714      | 0,994286 | 0,994286 | 0,994286 | 0,9942857  | 0,9885714 |
| jhp_1355  | 0,9538462      | 0,9846154      | 1        | 1        | 0,887755 | 0,9794872  | 0,9709302 |
| babB      | 0,8895801      | 0,9458272      | 0        | 0,636232 | 0,898449 | 0,6798906  | 0,9164306 |
| jhp_1103  | 0,8705148      | 0,7523659      | 0,877517 | 0,881956 | 0,884555 | 0,8685898  | 0,8439938 |
| babA      | 0,922043       | 0,8847185      | 0,792453 | 0,571015 | 0,854817 | 0,9097127  | 0,8788282 |
| jhp_0775  | 0,9900498      | 0,9950249      | 0,995025 | 0,995025 | 0,9801   | 0,9800995  | 0,9950249 |
| Cag_14    | 0,5653306      | 0,8844169      | 0,996248 | 0,996248 | 0,628233 | 0,2275132  | 0,6765714 |
| jhp_0119  | 0,9333333      | 0,9894737      | 0,988142 | 0,988142 | 0,965035 | 0,9719298  | 0,8986784 |

suppl HP homology of 22 final candidates

| Gene name | HP NQ4099 | HP NQ4228 | HP NQ4044 | HP NQ4071 | HP NQ4053 | HP NQ4161 | HP NQ4110 | HP Hp A-4 |
|-----------|-----------|-----------|-----------|-----------|-----------|-----------|-----------|-----------|
| jhp_1276  | 0,9821429 | 0,9821429 | 0,9761904 | 0,982143  | 0,9479769 | 0,9821429 | 0,9821429 | 0,982143  |
| jhp_0776  | 0,9902439 | 0,9658536 | 0,9707317 | 0,985366  | 0,9609756 | 0,9902439 | 0,9707317 | 1         |
| jhp_0718  | 0,9277389 | 0,9557109 | 0,9627039 | 0,937355  | 0,9370629 | 0,948718  | 0,9440559 | 0,974359  |
| jhp_0552  | 0,9392034 | 0,9643606 | 0,9832285 | 0,981132  | 0,9643606 | 0,9559748 | 0,9827957 | 0,953192  |
| jhp_0530  | 0,9090909 | 0,9385666 | 0,9572954 | 0,912587  | 0,8771331 | 0,9679715 | 0,9252669 | 0,901024  |
| jhp_0501  | 0,9074074 | 0,941358  | 0,8981481 | 0,91358   | 0,8981481 | 0,8981481 | 0,8878505 | 0,978193  |
| cagN      | 0,9803922 | 0,9738562 | 0,9542484 | 0,980392  | 0         | 0         | 0         | 0,960656  |
| orf17     | 0,9801587 | 0,984127  | 0,984127  | 0,992064  | 0         | 0         | 0         | 0,984127  |
| orf8      | 0,9272349 | 0,9397089 | 0,9209979 | 0,933472  | 0         | 0         | 0         | 0,978723  |
| orf6      | 0,9304348 | 0,9558824 | 0,9652174 | 0,930435  | 0         | 0         | 0         | 0,955882  |
| jhp_0444  | 0,9139785 | 0,8956835 | 0,9045936 | 0,902878  | 0,8971631 | 0,9028777 | 0,9172662 | 0,573477  |
| jhp_0369  | 0,9754386 | 0,9719298 | 0,9013606 | 0,975439  | 0,9298246 | 0,9754386 | 0,9214286 | 0,978947  |
| jhp_0173  | 0,8951311 | 0,9033457 | 0,8949276 | 0,906367  | 0,8876405 | 0,9291045 | 0,8777778 | 0,977695  |
| jhp_0136  | 0,9264706 | 0,9264706 | 0,9411765 | 0,955882  | 0,9264706 | 0,9117647 | 0,9411765 | 1         |
| lpp20     | 0,9942857 | 0,9885714 | 0,9885714 | 0,988571  | 0,9942857 | 0,9942857 | 0,9942857 | 0,994286  |
| jhp_1355  | 0,9641026 | 0,9883721 | 0,9794872 | 0,969231  | 0,9641026 | 0,9641026 | 0,9794872 | 0,989744  |
| babB      | 0,6410999 | 0,9004393 | 0,9497817 | 0,905099  | 0,8942172 | 0,9022663 | 0,909732  | 0,918009  |
| jhp_1103  | 0,8361934 | 0,8984127 | 0,8829953 | 0,886115  | 0,8875    | 0,8861154 | 0,7281399 | 0,879875  |
| babA      | 0,8514056 | 0,8236131 | 0,8511502 | 0,866936  | 0,9086022 | 0,877027  | 0,7263752 | 0,887989  |
| jhp_0775  | 0,9950249 | 1         | 0,9800995 | 0,975124  | 0,9800995 | 0,9950249 | 0,9850746 | 1         |
| Cag_14    | 0,614552  | 0,6716332 | 0,9216    | 0,574392  | 0,2393617 | 0,2367021 | 0,2367021 | 0,634173  |
| jhp_0119  | 0,951049  | 0,9531915 | 0,9230769 | 0,885106  | 0,9615384 | 0,9719298 | 0,9230769 | 0,987124  |

suppl HP homology of 22 final candidates

| Gene name | HP Hp A-9 | HP Hp A-5 | HP Hp A-20 | HP Hp A-17 | HP Hp H-28 | HP Hp H-24 | HP Hp H-27 | HP Hp H-29 |
|-----------|-----------|-----------|------------|------------|------------|------------|------------|------------|
| jhp_1276  | 0,975     | 0,9761904 | 0,9702381  | 0,9761904  | 0,9761904  | 0,9761904  | 0,9642857  | 0,9821429  |
| jhp_0776  | 0,9609756 | 0,9902439 | 0,9902439  | 0,9804878  | 0,9609756  | 0,9804878  | 0,9804878  | 0,9853659  |
| jhp_0718  | 0,9254079 | 0,951049  | 0,974359   | 0,9533799  | 0,934732   | 0,974359   | 0,9300699  | 0,965035   |
| jhp_0552  | 0,9811321 | 0,9638298 | 0,9622642  | 0,9685535  | 0,9361702  | 0,9531915  | 0,9622642  | 0,9787234  |
| jhp_0530  | 0,8187919 | 0,9572954 | 0,9644128  | 0,9715303  | 0,9032258  | 0,9893239  | 0,9180887  | 0,9964413  |
| jhp_0501  | 0,8981481 | 0,9813084 | 0,9719626  | 0,9750779  | 0,9003115  | 0,9719626  | 0,8487654  | 0,9750779  |
| cagN      | 0,9575163 | 0,9640523 | 0,9607843  | 0          | 0,9771242  | 0,9705882  | 0          | 0,9738562  |
| orf17     | 0,984127  | 0,984127  | 0,9801587  | 0,984127   | 0,9835391  | 0,984127   | 0          | 0,984127   |
| orf8      | 0,9230769 | 0,97921   | 0,972973   | 0,972973   | 0,9272349  | 0,981289   | 0          | 0,970894   |
| orf6      | 0,9565217 | 0,9826087 | 1          | 0,9705882  | 0,9478261  | 0,98       | 0          | 0,9826087  |
| jhp_0444  | 0,913669  | 0,9539007 | 0,9503546  | 0,9052632  | 0,9208633  | 0,9680851  | 0,9064748  | 0,964539   |
| jhp_0369  | 0,916955  | 0,9894737 | 0,9723184  | 0,9859649  | 0,9119718  | 0,9859649  | 0,9157895  | 0,9789473  |
| jhp_0173  | 0,9144982 | 0,9739777 | 0,9851301  | 0,9739777  | 0,8764045  | 0,9739777  | 0,8801498  | 0,9851301  |
| jhp_0136  | 0,9411765 | 0,9705882 | 0,9705882  | 0,9411765  | 0,9411765  | 0,9705882  | 0,9411765  | 0,9705882  |
| lpp20     | 0,9942857 | 0,9942857 | 0,9942857  | 0,9942857  | 0,9942857  | 0,9942857  | 0,9942857  | 0,9885714  |
| jhp_1355  | 0,9709302 | 0,9794872 | 0,9897436  | 0,9825581  | 0,9794872  | 0,994186   | 0,9794872  | 0,9883721  |
| babB      | 0,9065156 | 0,9320113 | 0,8571429  | 0,6583679  | 0,9163059  | 0,9171348  | 0,9148629  | 0,9305949  |
| jhp_1103  | 0,8858521 | 0,9402516 | 0,9107981  | 0,879257   | 0,8501872  | 0,9015625  | 0,7199367  | 0,9296875  |
| babA      | 0,9193549 | 0,8929539 | 0,9203779  | 0,8976487  | 0,9006897  | 0,8927614  | 0,7056277  | 0,8921739  |
| jhp_0775  | 0,9850746 | 0,9950249 | 0,9950249  | 1          | 0,9900498  | 0,9950249  | 0,9900498  | 0,9900498  |
| Cag_14    | 0,5601249 | 0,6658522 | 0,9688184  | 0,9887429  | 0,8595642  | 1          | 0,2195767  | 0,6118996  |
| jhp_0119  | 0,9358974 | 0,9871244 | 0,9871244  | 0,9742489  | 0,9427313  | 0,958042   | 0,9103943  | 0,9828326  |

suppl HP homology of 22 final candidates

| Gene name | HP Hp H-30 | HP Hp H-36 | HP Hp H-41 | HP Hp H-42 | HP Hp H-43 | HP Hp H-44 | HP Hp H-45 | HP Hp A-6 |
|-----------|------------|------------|------------|------------|------------|------------|------------|-----------|
| jhp_1276  | 0,9761904  | 0,9761904  | 0,9821429  | 0,9821429  | 0,9761904  | 0,9821429  | 0,9702381  | 0,9702381 |
| jhp_0776  | 0,9804878  | 0,9902439  | 0,9902439  | 0,9853659  | 0,9756098  | 0,9902439  | 0,9756098  | 0,9804878 |
| jhp_0718  | 0,969697   | 0,969697   | 0,9557109  | 0,97669    | 0,9440559  | 0,97669    | 0,9300699  | 0,97669   |
| jhp_0552  | 0,9538784  | 0,9622642  | 0,9538784  | 0,9643606  | 0,9832285  | 0,9595745  | 0,9874214  | 0,9580713 |
| jhp_0530  | 0,9537367  | 0,9644128  | 0,9893239  | 0,9846154  | 0,8327645  | 1          | 0,9288256  | 0,9893239 |
| jhp_0501  | 0,9719626  | 0,9657321  | 0,9813084  | 0,9688473  | 0,8598131  | 0,9688473  | 0,9190031  | 0,9537037 |
| cagN      | 0,9673203  | 0,9673203  | 0,9640523  | 0,9607843  | 0          | 0,9705882  | 0,9575163  | 0,9771242 |
| orf17     | 0,9801587  | 0,984127   | 0,984127   | 0,984127   | 0          | 0,984127   | 0,9920635  | 0,984127  |
| orf8      | 0,981289   | 0,981289   | 0,9771309  | 0,983368   | 0          | 0,9771309  | 0,9313929  | 0,983368  |
| orf6      | 0,973913   | 0,9913043  | 0,9913043  | 0,9913043  | 0          | 0,96       | 0,9565217  | 0,9826087 |
| jhp_0444  | 0,5770609  | 0,5770609  | 0,9574468  | 0,9716312  | 0,913669   | 0,7928572  | 0,9011407  | 0,7472924 |
| jhp_0369  | 0,9824561  | 0,9824561  | 0,9929824  | 0,9894737  | 0,9157895  | 0,968421   | 0,9157895  | 0,9824561 |
| jhp_0173  | 0,9776952  | 0,9739777  | 0,936803   | 1          | 0,8951311  | 0,9776952  | 0,8959108  | 0,9776952 |
| jhp_0136  | 0,9705882  | 0,9705882  | 0,9411765  | 0,9705882  | 0,9117647  | 0,9705882  | 0,9411765  | 0,9411765 |
| lpp20     | 0,9942857  | 0,9942857  | 0,9885714  | 0,9942857  | 0,9942857  | 0,9942857  | 0,9942857  | 0,9942857 |
| jhp_1355  | 0,9897436  | 0,9846154  | 0,9897436  | 0,9825581  | 0,9948718  | 0,9897436  | 0,9846154  | 0,9794872 |
| babB      | 0,9138418  | 0,7410586  | 0,9138418  | 0,9191919  | 0,9191919  | 0,9458272  | 0,6518219  | 0,9458272 |
| jhp_1103  | 0,93125    | 0,9110764  | 0,9141966  | 0,9282371  | 0,8829953  | 0,921875   | 0,8798077  | 0,900156  |
| babA      | 0,9055331  | 0,8665768  | 0,8953488  | 0,9157609  | 0,7085137  | 0,8636977  | 0,9122807  | 0,9341463 |
| jhp_0775  | 0,9950249  | 0,9950249  | 0,9900498  | 0,9950249  | 0,9900498  | 0,9950249  | 0,9751244  | 0,9950249 |
| Cag_14    | 0,9716312  | 0,6514393  | 0,6693002  | 0,9679204  | 0,2248677  | 0,6426814  | 0,6176471  | 0,9842271 |
| jhp_0119  | 0,9656652  | 0,9871244  | 0,9785408  | 0,9871244  | 0,9405594  | 0,9871244  | 0,9234043  | 0,9828326 |

suppl HP homology of 22 final candidates

| Gene name | HP Hp A-8 | HP Hp A-16 | HP Hp A-26 | HP Hp H-4 | HP Hp H-3 | HP Hp H-6 | HP Hp H-9 | HP Hp H-10 |
|-----------|-----------|------------|------------|-----------|-----------|-----------|-----------|------------|
| jhp_1276  | 0,9702381 | 0,9761904  | 0,9702381  | 0,9821429 | 0,9761904 | 0,9821429 | 0,9700599 | 0,9761904  |
| jhp_0776  | 0,9804878 | 0,9902439  | 0,9707317  | 0,9902439 | 0,9853659 | 0,9948186 | 0,9609756 | 0,9902439  |
| jhp_0718  | 0,981352  | 0,972028   | 0,9370629  | 0,9606481 | 0,9533799 | 0,9533799 | 0,9440559 | 0,9557109  |
| jhp_0552  | 0,9580713 | 0,9475891  | 0,9496855  | 0,9559748 | 0,9832285 | 0,9538784 | 0,9832285 | 0,9553192  |
| jhp_0530  | 0,9893239 | 0,9893239  | 0,9146758  | 0,9537367 | 0,9822064 | 0,9644128 | 0,8703071 | 0,9608541  |
| jhp_0501  | 0,9688473 | 0,9719626  | 0,9844237  | 0,9719626 | 0,9657321 | 0,94081   | 0,8734568 | 0,9501557  |
| cagN      | 0,9607843 | 0,9738562  | 0          | 0,8477011 | 0,9640523 | 0,9673203 | 0,9639344 | 0,9673203  |
| orf17     | 0,984127  | 0,9880952  | 0          | 0,984127  | 0,9960318 | 0,984127  | 0,984127  | 0,9871795  |
| orf8      | 0,9771309 | 0,95842    | 0          | 0,97921   | 0,972973  | 0,9787234 | 0,9334719 | 0,9771309  |
| orf6      | 0,9913043 | 0,9565217  | 0          | 0,973913  | 0,9913043 | 0,9852941 | 0,9565217 | 0,9826087  |
| jhp_0444  | 0,9539007 | 0,9574468  | 0,913669   | 0,8982456 | 0,9609929 | 0,609319  | 0,9244604 | 0,9574468  |
| jhp_0369  | 0,968421  | 0,9480969  | 0,9031142  | 0,9824561 | 0,9824561 | 0,9614035 | 0,899654  | 0,9824561  |
| jhp_0173  | 0,9776952 | 0,8764045  | 0,8913858  | 1         | 0,9702602 | 0,8838952 | 0,9033457 | 0,9296296  |
| jhp_0136  | 0,9705882 | 0,9411765  | 0,9411765  | 0,9558824 | 0,9705882 | 0,9705882 | 0,9264706 | 0,9411765  |
| lpp20     | 0,9942857 | 0,9885714  | 0,9942857  | 0,9942857 | 0,9942857 | 0,9942857 | 0,9942857 | 0,9942857  |
| jhp_1355  | 0,9846154 | 0,9948718  | 0,9794872  | 0,9794872 | 0,9897436 | 0,9846154 | 0,9794872 | 0,9897436  |
| babB      | 0,6783708 | 0,6531714  | 0,8873457  | 0,9194729 | 0,9225807 | 0,6671177 | 0,6487214 | 0,671141   |
| jhp_1103  | 0,9254658 | 0,909375   | 0,7199367  | 0,925     | 0,9294671 | 0,8814353 | 0,8861154 | 0,926677   |
| babA      | 0,866573  | 0,8987854  | 0,691358   | 0,9183673 | 0,9260753 | 0,8794326 | 0,9138627 | 0,8456376  |
| jhp_0775  | 0,9950249 | 0,9950249  | 0,9900498  | 0,9950249 | 1         | 0,9950249 | 0,9800995 | 0,9950249  |
| Cag_14    | 0,6706731 | 0,919418   | 0,2195767  | 0,9774105 | 0,6344606 | 0,8956522 | 0,6148909 | 0,9924242  |
| jhp_0119  | 0,9828326 | 0,9871244  | 0,9198312  | 0,9742489 | 0,9871244 | 0,9828326 | 0,9300699 | 0,9333333  |

suppl HP homology of 22 final candidates

| Gene name | HP Hp H-18 | HP Hp H-11 | HP Hp H-21 | HP Hp H-19 | HP Hp H-23 | HP Hp H-34 | HP Hp P-2 | HP Hp P-1 |
|-----------|------------|------------|------------|------------|------------|------------|-----------|-----------|
| jhp_1276  | 0,9821429  | 0,9702381  | 0,9821429  | 0,9761904  | 0,9761904  | 0,9761904  | 0,9702381 | 0,9821429 |
| jhp_0776  | 0,9902439  | 0,9609756  | 0,9902439  | 0,9853659  | 0,9853659  | 0,9902439  | 1         | 0,9756098 |
| jhp_0718  | 0,972028   | 0,9277389  | 0,969697   | 0,9440559  | 0,962877   | 0,979021   | 0,974359  | 0,967366  |
| jhp_0552  | 0,951782   | 0,9874214  | 0,9475891  | 0,9680851  | 0,9538784  | 0,9481328  | 0,966457  | 0,9496855 |
| jhp_0530  | 0,9608541  | 0,8926175  | 0,9295302  | 0,9078498  | 0,9537367  | 0,9537367  | 0,9044369 | 0,9644128 |
| jhp_0501  | 0,9719626  | 0,8919753  | 0,9688473  | 0,9844237  | 0,9657321  | 0,9563863  | 0,9719626 | 0,9688473 |
| cagN      | 0,9705882  | 0,9607843  | 0          | 0,9575163  | 0,9705882  | 0          | 0,9640523 | 0,9640523 |
| orf17     | 0,984127   | 0,9880952  | 0          | 0,984127   | 0,9801587  | 0          | 0,9920635 | 0,984127  |
| orf8      | 0,985447   | 0,9251559  | 0          | 0,97921    | 0,972973   | 0          | 0,9771309 | 0,985447  |
| orf6      | 0,9913043  | 0,9652174  | 0          | 0,9826087  | 0,9913043  | 0          | 0,9913043 | 0,94      |
| jhp_0444  | 0,9539007  | 0,9172662  | 0,9609929  | 0,9503546  | 0,9609929  | 0,8098592  | 0,9535714 | 0,9574468 |
| jhp_0369  | 0,9859649  | 0,9428571  | 0,9789473  | 0,9789473  | 0,968421   | 0,9614035  | 0,9894737 | 0,9614035 |
| jhp_0173  | 0,9814126  | 0,8764045  | 0,9888476  | 0,9851301  | 0,9814126  | 0,9814126  | 0,9814126 | 0,9814126 |
| jhp_0136  | 0,9558824  | 0,9411765  | 0,9705882  | 0,9411765  | 0,9705882  | 0,9705882  | 0,9705882 | 0,9705882 |
| lpp20     | 0,9942857  | 0,9885714  | 0,9942857  | 0,9942857  | 1          | 1          | 0,9942857 | 0,9885714 |
| jhp_1355  | 0,9794872  | 0,9692308  | 0,974359   | 1          | 0,9794872  | 1          | 0,9846154 | 0,9948718 |
| babB      | 0,9083216  | 0,9018759  | 0,7616959  | 0,8655462  | 0,9110169  | 0,7618365  | 0,9341142 | 0,6565517 |
| jhp_1103  | 0,878125   | 0,8982785  | 0,9203125  | 0,9068323  | 0,925      | 0,9297972  | 0,8923557 | 0,8907956 |
| babA      | 0,8872283  | 0,9026128  | 0,847561   | 0,8739837  | 0,8924731  | 0,8936743  | 0,8857143 | 0,8593103 |
| jhp_0775  | 0,9950249  | 0,9900498  | 0,9950249  | 0,9950249  | 1          | 0,9950249  | 1         | 0,9950249 |
| Cag_14    | 0,6444308  | 0,6057563  | 0,2393617  | 0,6344561  | 0,9962476  | 0,2222222  | 0,9719251 | 0,5982783 |
| jhp_0119  | 0,9785408  | 0,9333333  | 0,9871244  | 0,9785408  | 0,9785408  | 0,9828326  | 0,9871244 | 0,9871244 |

suppl HP homology of 22 final candidates

| Gene name | HP Hp P-3 | HP Hp P-8 | HP Hp P-4 | HP Hp P-11 | HP Hp P-25 | HP Hp H-24b | HP Hp H-24c | HP Hp P-1b |
|-----------|-----------|-----------|-----------|------------|------------|-------------|-------------|------------|
| jhp_1276  | 0,9821429 | 0,9761904 | 0,9821429 | 0,9880952  | 0,9821429  | 0,9761904   | 0,9761904   | 0,9821429  |
| jhp_0776  | 1         | 0,9804878 | 1         | 0,9902439  | 0,9804878  | 0,9804878   | 0,9804878   | 0,9756098  |
| jhp_0718  | 0,969697  | 0,986014  | 0,951049  | 0,9463869  | 0,9264368  | 0,974359    | 0,974359    | 0,967366   |
| jhp_0552  | 0,9574468 | 0,9516807 | 0,9811321 | 0,9433962  | 0,9601677  | 0,9531915   | 0,9531915   | 0,9510638  |
| jhp_0530  | 0,9679715 | 0,9861111 | 0,9078498 | 0,9692833  | 0,9777778  | 0,9893239   | 0,9893239   | 0,9658703  |
| jhp_0501  | 0,9688473 | 0,9750779 | 0,9595016 | 0,9351852  | 0,9795918  | 0,9719626   | 0,9719626   | 0,9688473  |
| cagN      | 0,9542484 | 0         | 0,9738562 | 0,9705882  | 0,9738562  | 0,9705882   | 0,9705882   | 0,9640523  |
| orf17     | 0,9801587 | 0,1862348 | 0,984127  | 0,984127   | 0,9753087  | 0,984127    | 0,984127    | 0,984127   |
| orf8      | 0,9771309 | 0         | 0,975052  | 0,9646569  | 0,972973   | 0,981289    | 0,981289    | 0,985447   |
| orf6      | 0,9705882 | 0         | 0,94      | 1          | 0,9826087  | 0,9913043   | 0,9913043   | 0,9558824  |
| jhp_0444  | 0,9716312 | 0,9751773 | 0,7598566 | 0,9787234  | 0,9857143  | 0,9680851   | 0,9680851   | 0,9574468  |
| jhp_0369  | 0,9719298 | 0,9653979 | 0,9859649 | 0,9894737  | 0,9929824  | 0,9859649   | 0,9859649   | 0,9614035  |
| jhp_0173  | 0,9739777 | 0,9814126 | 0,9702602 | 0,9776952  | 0,9739777  | 0,9739777   | 0,9739777   | 0,9814126  |
| jhp_0136  | 0,9705882 | 0,9705882 | 0,9411765 | 0,9411765  | 0,9705882  | 0,9705882   | 0,9705882   | 0,9705882  |
| lpp20     | 0,9885714 | 0,9942857 | 0,9942857 | 0,9942857  | 0,9942857  | 0,9942857   | 0,9942857   | 0,9885714  |
| jhp_1355  | 0,9897436 | 0,9897436 | 0,9794872 | 0,9948718  | 0,9794872  | 0,9948718   | 0,994186    | 0,994186   |
| babB      | 0,9399707 | 0,9121813 | 0,9138418 | 0,9399707  | 0,9163059  | 0,9171348   | 0,9171348   | 0,9253294  |
| jhp_1103  | 0,9157566 | 0,9262167 | 0,9203125 | 0,9063963  | 0,9359375  | 0,9015625   | 0,9015625   | 0,8907956  |
| babA      | 0,7360515 | 0,8536586 | 0,8362235 | 0,6998536  | 0,8967828  | 0,6952247   | 0,8927614   | 0,8443843  |
| jhp_0775  | 1         | 0,9950249 | 1         | 0,9950249  | 0,9950249  | 0,9950249   | 0,9950249   | 0,9950249  |
| Cag_14    | 0,6821316 | 0,2393617 | 0,675243  | 0,9779006  | 0,6332518  | 0,9130435   | 0,9130435   | 0,6125555  |
| jhp_0119  | 0,9828326 | 0,9785408 | 0,9871244 | 0,9828326  | 0,9871244  | 0,9615384   | 0,9529914   | 0,9871244  |



suppl HP homology of 22 final candidates

| Gene name | HP Hp P-4c | HP Hp H-5b | HP Hp P-4d | HP Hp P-8b | HP Hp P-11b | HP Hp P-13b | HP Hp P-25c | HP Hp P-28b |
|-----------|------------|------------|------------|------------|-------------|-------------|-------------|-------------|
| jhp_1276  | 0,9821429  | 0,9821429  | 0,9821429  | 0,9761904  | 0,9880952   | 0,9702381   | 0,9821429   | 0,9702381   |
| jhp_0776  | 1          | 0,9896373  | 1          | 0,9804878  | 0,9902439   | 0,9756098   | 0,9804878   | 0,9804878   |
| jhp_0718  | 0,948718   | 0,972028   | 0,948718   | 0,986014   | 0,9463869   | 0,983683    | 0,9463869   | 0,972028    |
| jhp_0552  | 0,9811321  | 0,966457   | 0,9811321  | 0,951782   | 0,9468085   | 0,951782    | 0,9601677   | 0,9468085   |
| jhp_0530  | 0,9078498  | 0,9846154  | 0,9078498  | 0,9928825  | 0,9692833   | 0,9466192   | 0,9608541   | 0,9466192   |
| jhp_0501  | 0,9595016  | 0,9657321  | 0,9595016  | 0,9750779  | 0,9351852   | 0,9750779   | 0,9388379   | 0,9750779   |
| cagN      | 0,9738562  | 0,9673203  | 0,9738562  | 0          | 0,9705882   | 0,9673203   | 0,9738562   | 0           |
| orf17     | 0,984127   | 0,9801587  | 0,984127   | 0,1862348  | 0,984127    | 0,984127    | 0,9801587   | 0           |
| orf8      | 0,975052   | 0,981289   | 0,975052   | 0          | 0,9646569   | 0,972973    | 0,972973    | 0,981289    |
| orf6      | 0,94       | 0,9913043  | 0,9826087  | 0          | 0,9852941   | 0,9913043   | 0,96        | 0,9913043   |
| jhp_0444  | 0,7598566  | 0,9751773  | 0,7598566  | 0,9751773  | 0,9787234   | 0,964539    | 0,9609929   | 0,9716312   |
| jhp_0369  | 0,9859649  | 0,9789473  | 0,9859649  | 0,9653979  | 0,9894737   | 0,9789473   | 0,9929824   | 0,9894737   |
| jhp_0173  | 0,9702602  | 0,9814126  | 0,9702602  | 0,9814126  | 0,9776952   | 0,9776952   | 0,9739777   | 0,9814126   |
| jhp_0136  | 0,9411765  | 0,9411765  | 0,9411765  | 0,9705882  | 0,9411765   | 0,9705882   | 0,9705882   | 1           |
| lpp20     | 0,9942857  | 0,9942857  | 0,9942857  | 0,9942857  | 0,9942857   | 0,9942857   | 0,9942857   | 0,9942857   |
| jhp_1355  | 0,9794872  | 0,974359   | 0,9794872  | 0,9897436  | 0,994186    | 0,9948718   | 0,9794872   | 0,9948718   |
| babB      | 0,9355783  | 0,9278499  | 0,9355783  | 0,9121813  | 0,9266573   | 0,9267936   | 0,9163059   | 0,5468531   |
| jhp_1103  | 0,9203125  | 0,9141966  | 0,9203125  | 0,9262167  | 0,9063963   | 0,91875     | 0,9359375   | 0,8876755   |
| babA      | 0,8362235  | 0,8693333  | 0,8362235  | 0,9380165  | 0,7108604   | 0,8857527   | 0,8981233   | 0,8521257   |
| jhp_0775  | 1          | 0,9950249  | 1          | 0,9950249  | 0,9950249   | 0,9950249   | 0,9950249   | 0,9900498   |
| Cag_14    | 0,6511628  | 0,9675824  | 0,6637555  | 0,2393617  | 0,6458886   | 0,6232832   | 0,6326406   | 0,2354497   |
| jhp_0119  | 0,9871244  | 0,9828326  | 0,9871244  | 0,9785408  | 0,9828326   | 0,9828326   | 0,9871244   | 0,9367089   |

suppl HP homology of 22 final candidates

| Gene name | HP Hp P-25d | HP Hp M2  | HP Hp M1  | HP Hp M3  | HP Hp M4  | HP Hp M5  | HP Hp M6  | HP Hp P-41 |
|-----------|-------------|-----------|-----------|-----------|-----------|-----------|-----------|------------|
| jhp_1276  | 0,9821429   | 0,975     | 0,9761904 | 0,9761904 | 0,9761904 | 0,9761904 | 0,975     | 0,9821429  |
| jhp_0776  | 0,9804878   | 0,9844559 | 0,9804878 | 0,9804878 | 0,9804878 | 0,9804878 | 0,9844559 | 0,9853659  |
| jhp_0718  | 0,9463869   | 0,974359  | 0,974359  | 0,974359  | 0,974359  | 0,974359  | 0,974359  | 0,979021   |
| jhp_0552  | 0,9601677   | 0,9531915 | 0,9531915 | 0,9531915 | 0,9531915 | 0,9531915 | 0,9548387 | 0,9914894  |
| jhp_0530  | 0,9608541   | 0,9893239 | 0,9893239 | 0,9861111 | 0,9893239 | 0,9893239 | 0,9861111 | 0,9466192  |
| jhp_0501  | 0,9388379   | 0,9719626 | 0,9719626 | 0,9719626 | 0,9719626 | 0,9719626 | 0,9719626 | 0,9657321  |
| cagN      | 0,9738562   | 0,9705882 | 0,9705882 | 0,9705882 | 0,9705882 | 0,9705882 | 0,9705882 | 0,9673203  |
| orf17     | 0,9801587   | 0,984127  | 0,984127  | 0,984127  | 0,984127  | 0,984127  | 0,984127  | 0,984127   |
| orf8      | 0,972973    | 0,9808511 | 0,981289  | 0,981289  | 0,981289  | 0,9808511 | 0,9808511 | 0,972973   |
| orf6      | 0,96        | 0,9913043 | 0,9913043 | 0,9913043 | 0,9913043 | 0,8016529 | 0,9913043 | 0,9652174  |
| jhp_0444  | 0,9609929   | 0,9680851 | 0,9680851 | 0,9680851 | 0,9680851 | 0,964539  | 0,9680851 | 0,9157895  |
| jhp_0369  | 0,9929824   | 0,9859649 | 0,9859649 | 0,9859649 | 0,9859649 | 0,9859649 | 1         | 0,9824561  |
| jhp_0173  | 0,9739777   | 0,9739777 | 0,9739777 | 0,9739777 | 0,9739777 | 0,9739777 | 0,9739777 | 0,9776952  |
| jhp_0136  | 0,9705882   | 0,9705882 | 0,9705882 | 0,9705882 | 0,9705882 | 0,9705882 | 0,9705882 | 0,9558824  |
| lpp20     | 0,9942857   | 0,9942857 | 0,9942857 | 0,9942857 | 0,9942857 | 0,9942857 | 0,9942857 | 0,9885714  |
| jhp_1355  | 0,9794872   | 0,9948718 | 0,9948718 | 0,9948718 | 0,9948718 | 0,9948718 | 0,9897436 | 0,9794872  |
| babB      | 0,9163059   | 0,9388646 | 0,9284579 | 0,9388646 | 0,9171348 | 0,9388646 | 0,9171348 | 0,6580406  |
| jhp_1103  | 0,9359375   | 0,9015625 | 0,9015625 | 0,9015625 | 0,9015625 | 0,9015625 | 0,8972713 | 0,9235569  |
| babA      | 0,8679578   | 0,8927614 | 0,8914209 | 0,8927614 | 0,8803149 | 0,8927614 | 0,8927614 | 0,9168207  |
| jhp_0775  | 0,9950249   | 0,9950249 | 0,9950249 | 0,9950249 | 0,9950249 | 0,9950249 | 0,9950249 | 1          |
| Cag_14    | 0,6326406   | 0,9563636 | 0,9353796 | 0,9285714 | 0,6225681 | 1         | 0,9501134 | 0,9373368  |
| jhp_0119  | 0,9871244   | 0,9529914 | 0,9615384 | 0,9615384 | 0,9656652 | 0,9529914 | 0,9529914 | 0,9785408  |

suppl HP homology of 22 final candidates

| Gene name | HP Hp P-26 | HP Hp P-30 | HP Hp P-62 | HP Hp P-3b | HP Hp P-2b | HP Hp M9  | HP R030b  | HP R018c  |
|-----------|------------|------------|------------|------------|------------|-----------|-----------|-----------|
| jhp_1276  | 0,9821429  | 0,9702381  | 0,9761904  | 0,9821429  | 0,9702381  | 0,9761904 | 0,9702381 | 0,9821429 |
| jhp_0776  | 0,9756098  | 0,9658536  | 0,9756098  | 1          | 1          | 0,9804878 | 0,9853659 | 0,9792746 |
| jhp_0718  | 0,979021   | 0,9324009  | 0,9393939  | 0,969697   | 0,974359   | 0,974359  | 0,941725  | 0,9277389 |
| jhp_0552  | 0,951782   | 0,9853249  | 0,9853249  | 0,9580713  | 0,966457   | 0,9531915 | 0,9659575 | 0,9811321 |
| jhp_0530  | 0,9555556  | 0,8668942  | 0,9217082  | 0,9679715  | 0,9044369  | 0,9893239 | 0,9857651 | 0,8657718 |
| jhp_0501  | 0,9688473  | 0,8888889  | 0,9688473  | 0,9688473  | 0,9719626  | 0,9719626 | 0,9750779 | 0,8785047 |
| cagN      | 0,9705882  | 0          | 0,9771242  | 0,9542484  | 0,9640523  | 0,9705882 | 0,9509804 | 0,9705882 |
| orf17     | 0,984127   | 0,1821862  | 0,9801587  | 0,9801587  | 0,9920635  | 0,984127  | 0,984127  | 0,9880952 |
| orf8      | 0,9771309  | 0          | 0,975052   | 0,9771309  | 0,9771309  | 0,981289  | 0,970894  | 0,9355509 |
| orf6      | 0,9913043  | 0          | 0,9558824  | 0,9913043  | 0,9913043  | 0,98      | 0,9826087 | 0,9652174 |
| jhp_0444  | 0,9680851  | 0,9        | 0,9539007  | 0,9716312  | 0,9535714  | 0,9680851 | 0,5812274 | 0,913669  |
| jhp_0369  | 0,9719298  | 0,9418182  | 0,9134948  | 0,9719298  | 0,9894737  | 0,9859649 | 0,9859649 | 0,9122807 |
| jhp_0173  | 0,9739777  | 0,9132075  | 0,9739777  | 0,9739777  | 0,9814126  | 0,9739777 | 0,9407408 | 0,9033457 |
| jhp_0136  | 0,9705882  | 0,9558824  | 0,9705882  | 0,9705882  | 0,9705882  | 0,9705882 | 0,9411765 | 0,9411765 |
| lpp20     | 0,9942857  | 0,9885714  | 0,9828572  | 0,9885714  | 0,9942857  | 0,9942857 | 0,9942857 | 0,9942857 |
| jhp_1355  | 0,9897436  | 0,9593023  | 0,9825581  | 0,9897436  | 0,9825581  | 0,9948718 | 0,9794872 | 0,974359  |
| babB      | 0,9264498  | 0,9220963  | 0,9447116  | 0,9448947  | 0,9067796  | 0,9388646 | 0,9036827 | 0,6505376 |
| jhp_1103  | 0,9296875  | 0,7262658  | 0,925      | 0,9157566  | 0,8923557  | 0,9015625 | 0,4834532 | 0,8876755 |
| babA      | 0,8825911  | 0,7041096  | 0,9246299  | 0,7027819  | 0,8713137  | 0,8927614 | 0,6798867 | 0,9260753 |
| jhp_0775  | 0,9950249  | 0,9850746  | 0,9950249  | 1          | 1          | 0,9950249 | 0,9950249 | 0,9850746 |
| Cag_14    | 0,9638554  | 0,2180851  | 0,9371221  | 0,6763006  | 0,6820012  | 0,9353796 | 0,6899942 | 0,5996366 |
| jhp_0119  | 0,9871244  | 0,9184549  | 0,9656652  | 0,9828326  | 0,9871244  | 0,9615384 | 0         | 0,9300699 |

suppl HP homology of 22 final candidates

| Gene name | HP R036d  | HP R037c  | HP R055a  | HP R056a  | HP Rif1   | HP Rif2   | HP GAM100Ai |
|-----------|-----------|-----------|-----------|-----------|-----------|-----------|-------------|
| jhp_1276  | 0,9702381 | 0,9761904 | 0,9761904 | 0,9821429 | 0,9761904 | 0,9761904 | 0,9593023   |
| jhp_0776  | 0,9707317 | 0,9756098 | 0,9804878 | 0,9792746 | 0,9658536 | 0,9658536 | 1           |
| jhp_0718  | 0,9300699 | 0,9230769 | 0,9207459 | 0,9277389 | 0,9230769 | 0,9230769 | 0,9705882   |
| jhp_0552  | 0,9895178 | 0,9769392 | 0,9769392 | 0,9811321 | 0,9832285 | 0,9832285 | 0,9638298   |
| jhp_0530  | 0,8422819 | 0,9145908 | 0,8703071 | 0,8657718 | 0,9003559 | 0,9003559 | 0,9112628   |
| jhp_0501  | 0,9183673 | 0,894081  | 0,8753894 | 0,8785047 | 0,8660436 | 0,8660436 | 0,9626168   |
| cagN      | 0,9411765 | 0         | 0,9607843 | 0,9705882 | 0,9509804 | 0,9509804 | 0,9705882   |
| orf17     | 0,9880952 | 0         | 0,984127  | 0,9880952 | 0,9920635 | 0,9920635 | 0,9794239   |
| orf8      | 0,9397089 | 0         | 0,9313929 | 0,9355509 | 0,9397089 | 0,9397089 | 0,9619565   |
| orf6      | 0,9478261 | 0         | 0,9565217 | 0,9652174 | 0,9565217 | 0,9565217 | 0,973913    |
| jhp_0444  | 0,9028777 | 0,9172662 | 0,8848921 | 0,913669  | 0,9172662 | 0,9172662 | 0,5698925   |
| jhp_0369  | 0,9192982 | 0,899654  | 0,9017544 | 0,9122807 | 0,925     | 0,925     | 0,9754386   |
| jhp_0173  | 0,8801498 | 0,8764045 | 0,8951311 | 0,9033457 | 0,8764045 | 0,8764045 | 0,9814126   |
| jhp_0136  | 0,9558824 | 0,9411765 | 0,9411765 | 0,9411765 | 0,9411765 | 0,9411765 | 0,9705882   |
| lpp20     | 0,9885714 | 0,9942857 | 0,9885714 | 0,9942857 | 1         | 1         | 0,9942857   |
| jhp_1355  | 0,9794872 | 0,9794872 | 0,9709302 | 0,974359  | 0,9692308 | 0,9692308 | 0,9825581   |
| babB      | 0,9134199 | 0,5857558 | 0,6478494 | 0,6505376 | 0,8912429 | 0,8912429 | 0,6380814   |
| jhp_1103  | 0,8622848 | 0,884375  | 0,8921875 | 0,8665568 | 0,8814353 | 0,8814353 | 0,9056604   |
| babA      | 0,8864865 | 0,6031977 | 0,9260753 | 0,9440389 | 0,9358799 | 0,9358799 | 0,5741279   |
| jhp_0775  | 0,9900498 | 0,9900498 | 0,9900498 | 0,9850746 | 0,9850746 | 0,9850746 | 0,9054054   |
| Cag_14    | 0,6039183 | 0,4519231 | 0,5946724 | 0,9634783 | 0,5620135 | 0,5620135 | 0,9964285   |
| jhp_0119  | 0,9265735 | 0,9335665 | 0,8285714 | 0,9291338 | 0,9405594 | 0,9405594 | 0,9894737   |

suppl HP homology of 22 final candidates

| Gene name | HP GAM101Biv | HP GAM114Ai | HP GAM201Ai | HP GAM118Bi | HP GAM210Bi | HP GAM121Aii |
|-----------|--------------|-------------|-------------|-------------|-------------|--------------|
| jhp_1276  | 0,9534883    | 0,9821429   | 0,9534883   | 0,9821429   | 0,9821429   | 0,9593023    |
| jhp_0776  | 0,9609756    | 1           | 0,9740933   | 0,9896373   | 0,9804878   | 0,9844559    |
| jhp_0718  | 0,981352     | 0,9656863   | 0,9681373   | 0,9779412   | 0,9658536   | 0,9803922    |
| jhp_0552  | 0,9531915    | 0,9510638   | 0,9553192   | 0,9281314   | 0,9553192   | 0,926078     |
| jhp_0530  | 0,8771331    | 0,9078498   | 0,8941979   | 0,9624574   | 0,9044369   | 0,9624574    |
| jhp_0501  | 0,9376947    | 0,9688473   | 0,8785047   | 0,9595016   | 0,9657321   | 0,9657321    |
| cagN      | 0            | 0,9738562   | 0           | 0,9705882   | 0,9738562   | 0,9705882    |
| orf17     | 0            | 0,984127    | 0           | 0,984127    | 0,984127    | 0,984127     |
| orf8      | 0            | 0,975052    | 0           | 0,6733524   | 0,975052    | 0,972973     |
| orf6      | 0            | 0,9565217   | 0           | 0,9652174   | 1           | 0,9913043    |
| jhp_0444  | 0,9468085    | 0,7021276   | 0,9574468   | 0,5698925   | 0,9680851   | 0,9539007    |
| jhp_0369  | 0,9824561    | 0,9964913   | 0,9859649   | 0,9929824   | 0,9859649   | 0,9859649    |
| jhp_0173  | 0,9219331    | 0,9813433   | 0,9851301   | 0,9776952   | 0,9962686   | 0,9776952    |
| jhp_0136  | 0,9558824    | 0,9705882   | 0,9705882   | 0,9705882   | 0,9705882   | 0,9705882    |
| lpp20     | 0,9828572    | 0,9885714   | 0,9942857   | 0,9942857   | 0,9942857   | 0,9942857    |
| jhp_1355  | 0,9883721    | 0,9825581   | 0,9883721   | 0,9825581   | 0,9825581   | 0,9767442    |
| babB      | 0,9423559    | 0,9270588   | 0,9312407   | 0,9239905   | 0,9226415   | 0,9391797    |
| jhp_1103  | 0,7492114    | 0,928125    | 0,7484177   | 0,9328125   | 0,9294671   | 0,9375975    |
| babA      | 0,8302752    | 0,8477366   | 0,7085202   | 0,8463252   | 0,8653136   | 0,6930693    |
| jhp_0775  | 0,8963964    | 0,9054054   | 0,9852217   | 0,9054054   | 0,9054054   | 0,9054054    |
| Cag_14    | 0,1878307    | 0,9929578   | 0,2195767   | 0,9946524   | 0,9763889   | 0,9606742    |
| jhp_0119  | 0,979021     | 0,9894737   | 0,9638989   | 0,9825175   | 0,9894737   | 0,9859649    |

suppl HP homology of 22 final candidates

| Gene name | HP GAM231Ai | HP GAM239Bi | HP GAM249T | HP GAM250AFi | HP GAM252T | HP GAM260ASi |
|-----------|-------------|-------------|------------|--------------|------------|--------------|
| jhp_1276  | 0,9593023   | 0,9593023   | 0,98125    | 0,98125      | 0,98125    | 0,9761904    |
| jhp_0776  | 0,9609756   | 0,9560975   | 1          | 0,9896373    | 0,9896373  | 1            |
| jhp_0718  | 0,9754902   | 0,9803922   | 0,9852941  | 0,9730392    | 0,9730392  | 0,9681373    |
| jhp_0552  | 0,9531915   | 0,9702128   | 0,9510638  | 0,9553192    | 0,9553192  | 0,9489362    |
| jhp_0530  | 0,8976109   | 0,9658703   | 0,8976109  | 0,9078498    | 0,9078498  | 0,9556314    |
| jhp_0501  | 0,9376947   | 0,9314642   | 0,9719626  | 0,9719626    | 0,9719626  | 0,9595016    |
| cagN      | 0           | 0           | 0,9673203  | 0,9673203    | 0,9673203  | 0,9705882    |
| orf17     | 0           | 0           | 0,984127   | 0,9801587    | 0,9801587  | 0,984127     |
| orf8      | 0           | 0           | 0,97921    | 0,975052     | 0,975052   | 0,975052     |
| orf6      | 0           | 0           | 0,9826087  | 0,9913043    | 0,9913043  | 0,9652174    |
| jhp_0444  | 0,9574468   | 0,925       | 0,9574468  | 0,964539     | 0,964539   | 0,9609929    |
| jhp_0369  | 0,9859649   | 0,9824561   | 0,9929824  | 0,9894737    | 0,9894737  | 0,9859649    |
| jhp_0173  | 0,9814126   | 0,9665428   | 0,96       | 0,9851301    | 0,9851301  | 0,9814126    |
| jhp_0136  | 0,9705882   | 0,9705882   | 0,9558824  | 0,9558824    | 0,9558824  | 0,9264706    |
| lpp20     | 0,9942857   | 0,9828572   | 0,9942857  | 1            | 1          | 0,9885714    |
| jhp_1355  | 0,994186    | 0,9883721   | 0,994186   | 0,9883721    | 0,9883721  | 0,9825581    |
| babB      | 0,8360882   | 0,9312039   | 0,8329897  | 0,9105883    | 0,9103774  | 0,937198     |
| jhp_1103  | 0,692       | 0,7515823   | 0,9131147  | 0,9265625    | 0,9265625  | 0,9226891    |
| babA      | 0,6157025   | 0,5707899   | 0,8571429  | 0,8251029    | 0,8247423  | 0,8267223    |
| jhp_0775  | 0,8963964   | 0,9009009   | 0,9054054  | 0,9571428    | 0,9571428  | 0,9054054    |
| Cag_14    | 0,2195767   | 0,2163588   | 0,9964413  | 0,9966997    | 0,9811617  | 0,9964222    |
| jhp_0119  | 0,979021    | 0,979021    | 0,9894737  | 0,9894737    | 0,9894737  | 0,9855596    |

suppl HP homology of 22 final candidates

| Gene name | HP GAM254Ai | HP GAM264Ai | HP GAM270ASi | HP GAM265BSii | HP GAM42Ai | HP GAM83T |
|-----------|-------------|-------------|--------------|---------------|------------|-----------|
| jhp_1276  | 0,975       | 0,9593023   | 0,98125      | 0,9534883     | 0,9761904  | 0,9761904 |
| jhp_0776  | 0,9609756   | 0,9792746   | 0,9844559    | 0,9792746     | 0,9948186  | 0,9637306 |
| jhp_0718  | 0,9852941   | 0,9730392   | 0,9557109    | 0,9828432     | 0,9393939  | 0,9730392 |
| jhp_0552  | 0,9475891   | 0,9496855   | 0,9531915    | 0,9446809     | 0,9489362  | 0,9744681 |
| jhp_0530  | 0,9146758   | 0,9078498   | 0,9624574    | 0,8976109     | 0,8839591  | 0,9692833 |
| jhp_0501  | 0,9657321   | 0,9314642   | 0,9719626    | 0,9719626     | 0,9719626  | 0,9252337 |
| cagN      | 0,9673203   | 0           | 0,9673203    | 0,9705882     | 0,9705882  | 0         |
| orf17     | 0,984127    | 0           | 0,984127     | 0,984127      | 0,984127   | 0         |
| orf8      | 0,985447    | 0           | 0,981289     | 0,975052      | 0,983368   | 0         |
| orf6      | 0,9652174   | 0           | 0,973913     | 0,9913043     | 0,9826087  | 0         |
| jhp_0444  | 0,5985663   | 0,9550562   | 0,5698925    | 0,6129032     | 0,9574468  | 0,9214286 |
| jhp_0369  | 0,9824561   | 0,9824561   | 0,9929824    | 0,9543859     | 0,9929824  | 0,9789473 |
| jhp_0173  | 0,9776952   | 0,9776952   | 0,9814126    | 0,9814126     | 0,9739777  | 0,9701493 |
| jhp_0136  | 0,9705882   | 0,9558824   | 0,9411765    | 0,9705882     | 0,9705882  | 0,9705882 |
| lpp20     | 0,9885714   | 0,9942857   | 0,9942857    | 0,9885714     | 0,9885714  | 0,9885714 |
| jhp_1355  | 0,994186    | 0,9825581   | 0,994186     | 0,9825581     | 0,994186   | 0,9883721 |
| babB      | 0,6293604   | 0,9495327   | 0,9178404    | 0,922049      | 0,9313132  | 0,9230769 |
| jhp_1103  | 0,9359375   | 0,7444795   | 0,9342723    | 0,925         | 0,9220779  | 0,7563291 |
| babA      | 0,8370221   | 0,5803698   | 0,8517745    | 0,8815977     | 0,8624755  | 0,8200455 |
| jhp_0775  | 0,9009009   | 0,9054054   | 0,9009009    | 0,9802955     | 0,9009009  | 0,9009009 |
| Cag_14    | 0,982412    | 0,2222222   | 0,9821162    | 0,9809221     | 0,9946524  | 0,2420213 |
| jhp_0119  | 0,9894737   | 0,9859649   | 0,9894737    | 0,9894737     | 0,9894737  | 0,9719298 |

suppl HP homology of 22 final candidates

| Gene name | HP GAM96Ai | HP GAM93Bi | HP HP116Bi | HP HP250ASi | HP HP250ASii | HP HP250BFii | HP HP260AFi |
|-----------|------------|------------|------------|-------------|--------------|--------------|-------------|
| jhp_1276  | 0,975      | 0,975      | 0,9593023  | 0,98125     | 0,9821429    | 0,98125      | 0,9761904   |
| jhp_0776  | 0,9689119  | 0,9896373  | 0,9740933  | 0,9896373   | 0,9896373    | 0,9896373    | 1           |
| jhp_0718  | 0,9705882  | 0,9779412  | 0,9656863  | 0,9730392   | 0,9730392    | 0,9730392    | 0,9681373   |
| jhp_0552  | 0,966457   | 0,9702128  | 0,9531915  | 0,9553192   | 0,9531915    | 0,9553192    | 0,9489362   |
| jhp_0530  | 0,8976109  | 0,9897611  | 0,8941979  | 0,9078498   | 0,9078498    | 0,9078498    | 0,9556314   |
| jhp_0501  | 0,9012346  | 0,9719626  | 0,9626168  | 0,9719626   | 0,9719626    | 0,9719626    | 0,9595016   |
| cagN      | 0,29683    | 0,9545454  | 0,9705882  | 0,9673203   | 0,9673203    | 0,9673203    | 0,9705882   |
| orf17     | 0,6388889  | 0,984127   | 0,9801587  | 0,9801587   | 0,9801587    | 0,9801587    | 0,984127    |
| orf8      | 0,6207585  | 0,9771309  | 0,9771309  | 0,975052    | 0,975052     | 0,975052     | 0,975052    |
| orf6      | 0,3587786  | 0,9913043  | 0,8560606  | 0,9913043   | 0,9913043    | 0,9913043    | 0,9652174   |
| jhp_0444  | 0,9142857  | 0,9577465  | 0,9539007  | 0,964539    | 0,964539     | 0,964539     | 0,9609929   |
| jhp_0369  | 0,9789473  | 0,9894737  | 0,9859649  | 0,9894737   | 0,9894737    | 0,9894737    | 0,9859649   |
| jhp_0173  | 0,9776952  | 0,9851301  | 0,9814126  | 0,9851301   | 0,9851301    | 0,9851301    | 0,9814126   |
| jhp_0136  | 0,9705882  | 0,9705882  | 0,9705882  | 0,9558824   | 0,9558824    | 0,9558824    | 0,9264706   |
| lpp20     | 0,9885714  | 0,9885714  | 0,9885714  | 1           | 1            | 1            | 0,9885714   |
| jhp_1355  | 0,9883721  | 0,994186   | 0,9767442  | 0,9883721   | 0,9883721    | 0,9883721    | 0,9825581   |
| babB      | 0,8577878  | 0,9174107  | 0,6369748  | 0,9105883   | 0,9105883    | 0,8993711    | 0,8855932   |
| jhp_1103  | 0,7436709  | 0,908922   | 0,9234375  | 0,928125    | 0,928125     | 0,9265625    | 0,925       |
| babA      | 0,8138614  | 0,8605634  | 0,9293194  | 0,8271605   | 0,8129176    | 0,8330134    | 0,8267223   |
| jhp_0775  | 0,8963964  | 0,9009009  | 0,8963964  | 0,9571428   | 0,9901478    | 0,9571428    | 0,9054054   |
| Cag_14    | 0,7414722  | 0,9967267  | 0,9775596  | 0,9966997   | 1            | 0,9966997    | 0,9964285   |
| jhp_0119  | 0,979021   | 0,9859649  | 0,9755245  | 0,9894737   | 0,9894737    | 0,9894737    | 0,9859649   |



suppl HP homology of 22 final candidates

| Gene name | HP HP250BFiV | HP HP260AFii | HP HP260BFii | HP OK113  | HP GAMchJs114i | HP GAMchJs136i |
|-----------|--------------|--------------|--------------|-----------|----------------|----------------|
| jhp_1276  | 0,9821429    | 0,9761904    | 0,9534883    | 0,9580838 | 0,9534883      | 0,9593023      |
| jhp_0776  | 0,9896373    | 1            | 0,9740933    | 0,9512195 | 0,9609756      | 0,9896373      |
| jhp_0718  | 0,9730392    | 0,9681373    | 0,9754902    | 0,9324009 | 0,9803922      | 0,9779412      |
| jhp_0552  | 0,9553192    | 0,9489362    | 0,9702128    | 0,9460581 | 0,9553192      | 0,9281314      |
| jhp_0530  | 0,9078498    | 0,9556314    | 0,9078498    | 0,9032258 | 0,8976109      | 0,9692833      |
| jhp_0501  | 0,9719626    | 0,9595016    | 0,845679     | 0,8584616 | 0,9314642      | 0,9688473      |
| cagN      | 0,9673203    | 0,9705882    | 0            | 0,9281046 | 0              | 0,9705882      |
| orf17     | 0,9801587    | 0,984127     | 0            | 0,9801587 | 0              | 0,984127       |
| orf8      | 0,975052     | 0,975052     | 0            | 0,9313929 | 0              | 0,981289       |
| orf6      | 0,9913043    | 0,9652174    | 0            | 0,9391304 | 0              | 0,9478261      |
| jhp_0444  | 0,964539     | 0,9609929    | 0,863924     | 0,7142857 | 0,9539007      | 0,9539007      |
| jhp_0369  | 0,9894737    | 0,9859649    | 0,9824561    | 0,9190141 | 0,9789473      | 0,9929824      |
| jhp_0173  | 0,9851301    | 0,9814126    | 0,9814126    | 0,8959108 | 0,9219331      | 0,9851301      |
| jhp_0136  | 0,9558824    | 0,9264706    | 0,9558824    | 0,9264706 | 0,9705882      | 0,9705882      |
| lpp20     | 1            | 0,9885714    | 0,9885714    | 0,9885714 | 0,9885714      | 0,9885714      |
| jhp_1355  | 0,9883721    | 0,9825581    | 0,9883721    | 0,9692308 | 0,9825581      | 0,9767442      |
| babB      | 0,9156626    | 0,8855932    | 0,9417293    | 0,8716502 | 0,7213115      | 0,6367583      |
| jhp_1103  | 0,9226891    | 0,9228188    | 0,6897233    | 0,8767551 | 0,7488152      | 0,921875       |
| babA      | 0,8247423    | 0,8267223    | 0,8361905    | 0,8798921 | 0,5828313      | 0,8440861      |
| jhp_0775  | 0,9901478    | 0,9054054    | 0,9802955    | 0,9900498 | 0,8918919      | 0,9054054      |
| Cag_14    | 0,9968454    | 0,9964285    | 0,2248677    | 0,5924528 | 0,2248677      | 0,9856459      |
| jhp_0119  | 0,9894737    | 0,9855596    | 0,968421     | 0,9106529 | 0,979021       | 0,9894737      |

suppl HP homology of 22 final candidates

| Gene name | HP GAMchJs124i | HP CCHI 33 | HP Hp H-1 | HP UMB_G1 | HP UM037  | HP PZ5086 | HP PZ5026 |
|-----------|----------------|------------|-----------|-----------|-----------|-----------|-----------|
| jhp_1276  | 0,9761904      | 0,9761904  | 0,96875   | 0,9821429 | 0,9761904 | 0,9702381 | 0,9821429 |
| jhp_0776  | 0,9689119      | 0,9853659  | 0,9707317 | 0,9658536 | 0,9707317 | 0,9705882 | 0,9658536 |
| jhp_0718  | 0,9779412      | 0,967366   | 0,969697  | 0,9300699 | 0,941725  | 0,9330254 | 0,9370629 |
| jhp_0552  | 0,9559748      | 0,9601677  | 0,9538784 | 0,9790356 | 0,9643606 | 0,9454927 | 0,9496855 |
| jhp_0530  | 0,8976109      | 0,9078498  | 0,9692833 | 0,9180887 | 0,8225256 | 0,890785  | 0,8976109 |
| jhp_0501  | 0,9345794      | 0,9688473  | 0,9439253 | 0,8878505 | 0,903125  | 0,9046154 | 0,9104939 |
| cagN      | 0              | 0,9738562  | 0,9705882 | 0         | 0,9575163 | 0,9607843 | 0,9705882 |
| orf17     | 0              | 0,984127   | 0,984127  | 0         | 0,9801587 | 0,984127  | 0,9880952 |
| orf8      | 0              | 0,983368   | 0,981289  | 0         | 0,9501039 | 0,9272349 | 0,95842   |
| orf6      | 0              | 0,9913043  | 0,9913043 | 0         | 0,9396552 | 0,9826087 | 0,9478261 |
| jhp_0444  | 0,9574468      | 0,5770609  | 0,9822695 | 0,9       | 0,913669  | 0,9163498 | 0,8892857 |
| jhp_0369  | 0,9824561      | 0,9754386  | 0,9824561 | 0,9307958 | 0,9192982 | 0,9192982 | 0,968421  |
| jhp_0173  | 0,9628253      | 0,9739777  | 0,9851301 | 0,8913858 | 0,9107807 | 0,9222222 | 0,8913858 |
| jhp_0136  | 0,9558824      | 0,9705882  | 0,9705882 | 0,9411765 | 0,9411765 | 0,9558824 | 0,9264706 |
| lpp20     | 0,9885714      | 0,9942857  | 0,9942857 | 0,9942857 | 0,9942857 | 1         | 1         |
| jhp_1355  | 0,9767442      | 0,9948718  | 0,9948718 | 0,9794872 | 0,9589744 | 0,9897436 | 0,9641026 |
| babB      | 0,9356322      | 0,9062049  | 0,9490085 | 0,924964  | 0,897511  | 0         | 0         |
| jhp_1103  | 0,756714       | 0,9328125  | 0,9265625 | 0,7142857 | 0,8861154 | 0,8264151 | 0,8734375 |
| babA      | 0,5783476      | 0,8843538  | 0,9216216 | 0,7085137 | 0,8915989 | 0         | 0         |
| jhp_0775  | 0,9852217      | 0,9950249  | 0,9950249 | 0,9900498 | 0,9900498 | 0         | 0,9800995 |
| Cag_14    | 0,2248677      | 0,6015958  | 0,720405  | 0,2248677 | 0,8625147 | 0,9578947 | 0,9655647 |
| jhp_0119  | 0,9755245      | 0,9881423  | 0,9841897 | 0,9212598 | 0,9192982 | 0,9615384 | 0,9475524 |

suppl HP homology of 22 final candidates

| Gene name | HP PZ5080 | HP PZ5024 | HP PZ5004 | HP PZ5056 | HP GAM117Ai | HP CG-IMSS-2012 | HP X47-2AL |
|-----------|-----------|-----------|-----------|-----------|-------------|-----------------|------------|
| jhp_1276  | 0,9821429 | 0,9761904 | 0,9821429 | 0,9593023 | 0,98125     | 0,9761904       | 0,9761904  |
| jhp_0776  | 0,9902439 | 0,9902439 | 0,9902439 | 0,9756098 | 0,9844559   | 0,9658536       | 0,9707317  |
| jhp_0718  | 0,9254079 | 0,983683  | 0,974359  | 0,9393939 | 0,948718    | 0,9351852       | 0,9254079  |
| jhp_0552  | 0,9853249 | 0,9350105 | 0,9433962 | 0,9371069 | 0,9553192   | 0,9853249       | 0,9832285  |
| jhp_0530  | 0,828859  | 0,9180887 | 0,9044369 | 0,8839591 | 0,9078498   | 0               | 0,8805461  |
| jhp_0501  | 0,9190031 | 0,9750779 | 0,9750779 | 0,9688473 | 0,9719626   | 0,9158878       | 0,8847352  |
| cagN      | 0,9705882 | 0,9477124 | 0,9771242 | 0,9705882 | 0,9738562   | 0,9705882       | 0          |
| orf17     | 0,984127  | 0,984127  | 0,984127  | 0,9880952 | 0,984127    | 0,984127        | 0          |
| orf8      | 0,9334719 | 0,981289  | 0,975052  | 0,9521829 | 0,972973    | 0               | 0          |
| orf6      | 0,9565217 | 1         | 1         | 0,7567568 | 0,9826087   | 0,8195488       | 0          |
| jhp_0444  | 0,9103943 | 0,8658147 | 0,964539  | 0,9064748 | 0,964539    | 0,8848921       | 0,913669   |
| jhp_0369  | 0,9508772 | 0,9377162 | 0,968421  | 0,9614035 | 0,9653979   | 0,9300699       | 0,9204152  |
| jhp_0173  | 0,9296296 | 0,9702602 | 0,9702602 | 0,9259259 | 0,9814126   | 0,8768657       | 0,8764045  |
| jhp_0136  | 0,9558824 | 0,9705882 | 0,9411765 | 0,9705882 | 0,9705882   | 0,9411765       | 0,9264706  |
| lpp20     | 0,9885714 | 0,9942857 | 0,9942857 | 0,9942857 | 0,9942857   | 1               | 0,9885714  |
| jhp_1355  | 0,9641026 | 0,9948718 | 0,9948718 | 0,9794872 | 0,9767442   | 0               | 0,9641026  |
| babB      | 0,6809524 | 0         | 0         | 0         | 0,9285714   | 0,8632911       | 0,8815233  |
| jhp_1103  | 0,7142857 | 0,9078125 | 0,9301242 | 0,8677166 | 0,9189723   | 0,89375         | 0,7203792  |
| babA      | 0,6730159 | 0         | 0         | 0         | 0,8823529   | 0,9102564       | 0,7235543  |
| jhp_0775  | 1         | 0,9882353 | 0         | 1         | 0,9054054   | 0,9800995       | 0,9850746  |
| Cag_14    | 0,9658915 | 0,9752066 | 0,9773499 | 0,942647  | 0,9964602   | 0,9694794       | 0,2407407  |
| jhp_0119  | 0,9719298 | 0,9824561 | 0,9824561 | 0,9543859 | 0,986014    | 0,9649123       | 0,9263158  |

suppl HP homology of 22 final candidates

| Gene name | HP oki102 | HP oki112 | HP oki422 | HP oki898 | HP J166   | HP NY40   | HP 26695-1 | HP PMSS1  |
|-----------|-----------|-----------|-----------|-----------|-----------|-----------|------------|-----------|
| jhp_1276  | 0,952381  | 0,952381  | 0,952381  | 0,952381  | 0,9702381 | 0,9821429 | 0,9761904  | 0,9761904 |
| jhp_0776  | 0,9756098 | 0,9658536 | 0,9756098 | 0,9756098 | 0,9658536 | 0,9844559 | 0,9658536  | 0,9707317 |
| jhp_0718  | 0,934732  | 0,9300699 | 0,9324009 | 0,9324009 | 0,9393939 | 0,9607843 | 0,9230769  | 0,9351852 |
| jhp_0552  | 0,9769392 | 0,9748428 | 0,9419087 | 0,9439834 | 0,9832285 | 0,9748428 | 0,9832285  | 0,9832285 |
| jhp_0530  | 0,887372  | 0,887372  | 0,887372  | 0,887372  | 0,8771331 | 0,8941979 | 0,8976109  | 0,8557047 |
| jhp_0501  | 0,8691589 | 0         | 0,8691589 | 0,8691589 | 0,8785047 | 0,9259259 | 0,8660436  | 0,8816199 |
| cagN      | 0,9477124 | 0,9379085 | 0,9444444 | 0,9444444 | 0,9607843 | 0,9803922 | 0,9509804  | 0,9640523 |
| orf17     | 0,9801587 | 0,9801587 | 0,9801587 | 0,9880952 | 0,9880952 | 0,9801587 | 0,9920635  | 0,9960318 |
| orf8      | 0,9334719 | 0,9313929 | 0,9334719 | 0,9334719 | 0,9334719 | 0,9272349 | 0,9397089  | 0,9334719 |
| orf6      | 0,7414966 | 0,7414966 | 0,7414966 | 0,7414966 | 0,9565217 | 0,9565217 | 0,9565217  | 0,9304348 |
| jhp_0444  | 0,7617329 | 0,9208633 | 0,9208633 | 0,9208633 | 0,9097473 | 0,910072  | 0,9172662  | 0,913669  |
| jhp_0369  | 0,9044369 | 0,9273356 | 0,916955  | 0,916955  | 0,9190141 | 0,9333333 | 0,925      | 0,9122807 |
| jhp_0173  | 0,8847584 | 0,8773234 | 0,8013698 | 0,8847584 | 0,8726591 | 0,8656716 | 0,8764045  | 0,9070632 |
| jhp_0136  | 0,9411765 | 0,9411765 | 0,9411765 | 0,9411765 | 0,9558824 | 0,9411765 | 0,9411765  | 0,9411765 |
| lpp20     | 0,9942857 | 0,9885714 | 0,9942857 | 0,9942857 | 0,9885714 | 0,9885714 | 1          | 1         |
| jhp_1355  | 0,9692308 | 0,9692308 | 0,9692308 | 0,9692308 | 0,9794872 | 0,9692308 | 0,9692308  | 0,9641026 |
| babB      | 0,6486486 | 0,6612466 | 0,8888889 | 0,8728814 | 0,9150141 | 0,9135978 | 0,8912429  | 0,9177489 |
| jhp_1103  | 0,7246835 | 0,8845554 | 0,8810642 | 0,8814353 | 0,884375  | 0,8814353 | 0,8814353  | 0,8479624 |
| babA      | 0,8662162 | 0,8766938 | 0,8605898 | 0,8864865 | 0,9123989 | 0,7637131 | 0,9358799  | 0,7171717 |
| jhp_0775  | 0,9900498 | 0,9900498 | 0,9900498 | 0,9900498 | 0,9950249 | 0,9950249 | 0,9850746  | 0,9900498 |
| Cag_14    | 0,5588998 | 0,5886487 | 0,5915931 | 0,6043406 | 0,5635703 | 0,9606189 | 0,5614945  | 0,8492308 |
| jhp_0119  | 0,9370629 | 0,9300699 | 0,9265735 | 0,9265735 | 0,9440559 | 0,9685315 | 0,9405594  | 0,9475524 |

suppl HP homology of 22 final candidates

| Gene name | HP SS1    | HP HPAG1  | HP NCTC 11637 = CCUG 17874 = ATCC 43504 | HP Hp P-15 | HP Hp P-23 |
|-----------|-----------|-----------|-----------------------------------------|------------|------------|
| jhp_1276  | 0,9761904 | 0,9761904 | 0,9761904                               | 0,9761904  | 0,9821429  |
| jhp_0776  | 0,9689119 | 0,9756098 | 0,9658536                               | 0,9804878  | 0,9804878  |
| jhp_0718  | 0,9351852 | 0,9254079 | 0,9254079                               | 0,934732   | 0,9557109  |
| jhp_0552  | 0,9832285 | 0,9853249 | 0,9769392                               | 0,966457   | 0,9811321  |
| jhp_0530  | 0,8976109 | 0,8839591 | 0                                       | 0,9288256  | 0,9323843  |
| jhp_0501  | 0,8816199 | 0,9034268 | 0,9593496                               | 0,9657321  | 0,8878505  |
| cagN      | 0,9640523 | 0,9411765 | 0,9771242                               | 0          | 0          |
| orf17     | 0,9960318 | 0,984127  | 0,984127                                | 0          | 0          |
| orf8      | 0,9397089 | 0,9313929 | 0,9313929                               | 0          | 0          |
| orf6      | 0,9565217 | 0,973913  | 0,973913                                | 0          | 0          |
| jhp_0444  | 0,9172662 | 0,9208633 | 0,8928571                               | 0,9388489  | 0,8953069  |
| jhp_0369  | 0,925     | 0,9238755 | 0,925                                   | 0,9122807  | 0,9192982  |
| jhp_0173  | 0,9070632 | 0,8847584 | 0,9033457                               | 0,8801498  | 0,8801498  |
| jhp_0136  | 0,9411765 | 0,9411765 | 0,9411765                               | 0,9411765  | 0,9264706  |
| lpp20     | 1         | 0,9942857 | 0,9942857                               | 0,9885714  | 0,9942857  |
| jhp_1355  | 0,9692308 | 0,974359  | 0,9692308                               | 0,974359   | 0,9651163  |
| babB      | 0,9177489 | 0,9094766 | 0,5876963                               | 0,8808511  | 0,9615384  |
| jhp_1103  | 0,8814353 | 0,8642746 | 0,5965583                               | 0,708126   | 0,7435898  |
| babA      | 0,7171717 | 0,9301075 | 0,8551402                               | 0,729078   | 0,8341346  |
| jhp_0775  | 0,9900498 | 0,9753695 | 0,9800995                               | 0,9900498  | 0,9950249  |
| Cag_14    | 0,9529042 | 0,9335347 | 0,9491525                               | 0,3        | 0,2523364  |
| jhp_0119  | 0,9475524 | 0,9265735 | 0,9265735                               | 0,9263158  | 0,9263158  |

suppl HP homology of 22 final candidates

| Gene name | HP Hp P-74 | HP Hp P-15b | HP UM114  | HP oki128 | HP Hp P-16 | HP 52     | HP v225d  | HP B8     |
|-----------|------------|-------------|-----------|-----------|------------|-----------|-----------|-----------|
| jhp_1276  | 0,9702381  | 0,9761904   | 0,9761904 | 0,9356725 | 0,9702381  | 0,9520958 | 0,9461078 | 0,9642857 |
| jhp_0776  | 0,9792746  | 0,9804878   | 0,9658536 | 0,9560975 | 0,9756098  | 0,9609756 | 0,9512195 | 0,9609756 |
| jhp_0718  | 0,951049   | 0,934732    | 0,9189815 | 0,9300699 | 0,9440559  | 0,9324009 | 0,9277389 | 0,9254079 |
| jhp_0552  | 0,9874214  | 0,9643606   | 0,9643606 | 0,9475891 | 0,9727463  | 0,9456067 | 0,932914  | 0,9811321 |
| jhp_0530  | 0,8839591  | 0,9288256   | 0,9112628 | 0,9112628 | 0,9555556  | 0,9010239 | 0,9140893 | 0,8839591 |
| jhp_0501  | 0,9034268  | 0,9657321   | 0,9       | 0,8193147 | 0,9003115  | 0,8878505 | 0,8765432 | 0,8785047 |
| cagN      | 0          | 0           | 0,9379085 | 0         | 0          | 0,9477124 | 0,9346405 | 0,9512987 |
| orf17     | 0          | 0           | 0,9880952 | 0         | 0          | 0,9801587 | 0,9880952 | 0,9880952 |
| orf8      | 0          | 0           | 0,9313929 | 0         | 0          | 0,9355509 | 0,9313929 | 0,9334719 |
| orf6      | 0          | 0           | 0,9391304 | 0         | 0          | 0,7619048 | 0,9565217 | 0,9565217 |
| jhp_0444  | 0,9285714  | 0,9388489   | 0,9       | 0,8892857 | 0,8711111  | 0,6914893 | 0,8857143 | 0,9064748 |
| jhp_0369  | 0,9157895  | 0,9122807   | 0,9236111 | 0,9236111 | 0,9157895  | 0,9236111 | 0,9260563 | 0,9190141 |
| jhp_0173  | 0,8801498  | 0,8801498   | 0,8897339 | 0,8810409 | 0,8810409  | 0,8847584 | 0,8726591 | 0,8943396 |
| jhp_0136  | 0,9411765  | 0,9411765   | 0,9411765 | 0,9264706 | 0,9264706  | 0,9411765 | 0,9264706 | 0,9411765 |
| lpp20     | 0,9942857  | 0,9885714   | 0,9771429 | 0,9942857 | 0,9885714  | 0,9771429 | 0,9942857 | 0,9942857 |
| jhp_1355  | 0,9794872  | 0,9767442   | 0,9692308 | 0,974359  | 0,9693878  | 0,9534883 | 0,9589744 | 0,9794872 |
| babB      | 0,9150141  | 0,7847534   | 0,910473  | 0,7739899 | 0,9291785  | 0,8787024 | 0,8852691 | 0,6601672 |
| jhp_1103  | 0,7246835  | 0,721519    | 0,8904538 | 0,7101911 | 0,7192429  | 0,885759  | 0,8203125 | 0,8828125 |
| babA      | 0,7055631  | 0,7046071   | 0,8986486 | 0,8627187 | 0,703966   | 0,8699187 | 0,8455393 | 0,8789116 |
| jhp_0775  | 0,9900498  | 0,9900498   | 0,9950249 | 0,9850746 | 0,9900498  | 0,9950249 | 0,9950249 | 0,9900498 |
| Cag_14    | 0,2222222  | 0,3         | 0,9110473 | 0,2195767 | 0,2248677  | 0,56902   | 0,6142534 | 0,5738605 |
| jhp_0119  | 0,9368421  | 0,9263158   | 0,9125874 | 0,9100346 | 0,9300699  | 0,9134948 | 0,899654  | 0,9440559 |

suppl HP homology of 22 final candidates

| Gene name | HP 35A    | HP F16    | HP F30    | HP 83     | HP SNT49  | HP CPY1124 | HP CPY3281 | HP CPY6311 |
|-----------|-----------|-----------|-----------|-----------|-----------|------------|------------|------------|
| jhp_1276  | 0,9520958 | 0,9640719 | 0,9461078 | 0,9520958 | 0,9761904 | 0,9520958  | 0,9580838  | 0,9520958  |
| jhp_0776  | 0,9359606 | 0,9560975 | 0,9609756 | 0,9637306 | 0,9609756 | 0,9609756  | 0,9658536  | 0,9408867  |
| jhp_0718  | 0,9393939 | 0,9324009 | 0,9324009 | 0,934732  | 0,9230769 | 0,9370629  | 0,9327146  | 0,934732   |
| jhp_0552  | 0,9126016 | 0,9419087 | 0,9454927 | 0,9454927 | 0,9601677 | 0,9548387  | 0,9496855  | 0,9475891  |
| jhp_0530  | 0,9072165 | 0,9139785 | 0,9103943 | 0,9692308 | 0,9097222 | 0,9139785  | 0,9072165  | 0,9106529  |
| jhp_0501  | 0,8691589 | 0,8691589 | 0,8425926 | 0,8878505 | 0,909375  | 0,8753894  | 0,8660436  | 0,8785047  |
| cagN      | 0,9379085 | 0,9281046 | 0,9444444 | 0,9248366 | 0,9575163 | 0,9248366  | 0,9248366  | 0,9379085  |
| orf17     | 0,984127  | 0,984127  | 0,984127  | 0,9761904 | 0,9880952 | 0,984127   | 0,9801587  | 0,9801587  |
| orf8      | 0,9334719 | 0,9334719 | 0,9272349 | 0,9313929 | 0,9334719 | 0,9334719  | 0,929314   | 0,9355509  |
| orf6      | 0,9565217 | 0,9478261 | 0,9478261 | 0,9565217 | 0,9478261 | 0,9565217  | 0,9565217  | 0,9652174  |
| jhp_0444  | 0,7285714 | 0,7127659 | 0,7071428 | 0,6950355 | 0,9107143 | 0,7        | 0,7214286  | 0,7178571  |
| jhp_0369  | 0,915493  | 0,9225352 | 0,9190141 | 0,915493  | 0,9306569 | 0,9260563  | 0,9447236  | 0,9119718  |
| jhp_0173  | 0,8959108 | 0,8523985 | 0,8810409 | 0,8921933 | 0,8913858 | 0,8810409  | 0,8959108  | 0,8921933  |
| jhp_0136  | 0,9411765 | 0,9411765 | 0,9705882 | 0,9411765 | 0,9411765 | 0,9558824  | 0,9411765  | 0,9411765  |
| lpp20     | 0,9885714 | 0,9942857 | 0,9942857 | 0,9885714 | 0,9885714 | 0,9942857  | 0,9942857  | 0,9942857  |
| jhp_1355  | 0,9692308 | 0,9538462 | 0,9641026 | 0,9692308 | 0,9692308 | 0,9593023  | 0,9641026  | 0,9534883  |
| babB      | 0,8866856 | 0,8533145 | 0,8866856 | 0,8866856 | 0,9036827 | 0,8797737  | 0,8492958  | 0,8895184  |
| jhp_1103  | 0,8765625 | 0,866562  | 0,8761755 | 0,8439938 | 0,8890625 | 0,8507937  | 0,88125    | 0,8746082  |
| babA      | 0,8790323 | 0,8829072 | 0,8893387 | 0,6784703 | 0,9039242 | 0,8960864  | 0,8663968  | 0,864682   |
| jhp_0775  | 0,8963964 | 0,9900498 | 0,9950249 | 0,9950249 | 0,9850746 | 0,9900498  | 0,9900498  | 0,9900498  |
| Cag_14    | 0,6332777 | 0,626392  | 0,5815161 | 0,928344  | 0,6299388 | 0,9042857  | 0,6015303  | 0,633602   |
| jhp_0119  | 0,9100346 | 0,899654  | 0,916955  | 0,9134948 | 0,9020979 | 0,9029536  | 0,8987342  | 0,9156118  |

suppl HP homology of 22 final candidates

| Gene name | HP R32b   | HP R046Wa | HP OK310  | HP Hp A-11 | HP UM032  | HP UM299  | HP UM066  | HP UM298  |
|-----------|-----------|-----------|-----------|------------|-----------|-----------|-----------|-----------|
| jhp_1276  | 0,9642857 | 0,9702381 | 0,9520958 | 0,9583333  | 0,9640719 | 0,9640719 | 0,9520958 | 0,9640719 |
| jhp_0776  | 0,9707317 | 0,9707317 | 0,9609756 | 0,9707317  | 0,9658536 | 0,9658536 | 0,9658536 | 0,9658536 |
| jhp_0718  | 0,9230769 | 0,9324009 | 0,934732  | 0,9207459  | 0,9277389 | 0,9277389 | 0,934732  | 0,9277389 |
| jhp_0552  | 0,9340426 | 0,9832285 | 0,9481328 | 0,9853249  | 0,9433962 | 0,9433962 | 0,9643606 | 0,9433962 |
| jhp_0530  | 0,9555556 | 0,8758389 | 0,90681   | 0,9181495  | 0,8976109 | 0,8976109 | 0,9140893 | 0,8976109 |
| jhp_0501  | 0,9003115 | 0,9283489 | 0,8753894 | 0,8971962  | 0,9252337 | 0,9252337 | 0,8611111 | 0,9252337 |
| cagN      | 0,9477124 | 0         | 0,9281046 | 0,9771242  | 0,9477124 | 0,9477124 | 0,9313725 | 0,9477124 |
| orf17     | 0,984127  | 0         | 0,9920635 | 0,9920635  | 0,9880952 | 0,9880952 | 0,9880952 | 0,9880952 |
| orf8      | 0,9334719 | 0         | 0,9355509 | 0,9313929  | 0,9313929 | 0,9313929 | 0,929314  | 0,9313929 |
| orf6      | 0,9652174 | 0,9655172 | 0,9391304 | 0,92       | 0,9478261 | 0,9478261 | 0,9478261 | 0,9478261 |
| jhp_0444  | 0,9280576 | 0,9028777 | 0,7214286 | 0,9208633  | 0,7198582 | 0,7198582 | 0,6950355 | 0,7198582 |
| jhp_0369  | 0,9119718 | 0,9357143 | 0,9190141 | 0,9178572  | 0,915493  | 0,915493  | 0,9119718 | 0,915493  |
| jhp_0173  | 0,8689138 | 0,8988764 | 0,8801498 | 0,8951311  | 0,8959108 | 0,8959108 | 0,8880597 | 0,8959108 |
| jhp_0136  | 0,8970588 | 0,9264706 | 0,9558824 | 0,9264706  | 0,9558824 | 0,9558824 | 0,9411765 | 0,9558824 |
| lpp20     | 0,9942857 | 0,9885714 | 0,9942857 | 0,9942857  | 0,9942857 | 0,9942857 | 0,9942857 | 0,9942857 |
| jhp_1355  | 0,9589744 | 0,974359  | 0,9589744 | 0,974359   | 0,9484536 | 0,9484536 | 0,9538462 | 0,9484536 |
| babB      | 0,6638298 | 0,6657646 | 0,7446198 | 0,9121813  | 0,8726208 | 0,8726208 | 0,8838527 | 0,8726208 |
| jhp_1103  | 0,8736349 | 0,878125  | 0,8689548 | 0,8965517  | 0,8622848 | 0,8622848 | 0,8549142 | 0,8622848 |
| babA      | 0,6737589 | 0,9350474 | 0,8748299 | 0,8972973  | 0,8690958 | 0,8690958 | 0,8893387 | 0,8690958 |
| jhp_0775  | 0,9850746 | 0,9900498 | 0,9950249 | 0,9950249  | 1         | 1         | 1         | 1         |
| Cag_14    | 1         | 0,5111111 | 0,5677385 | 0,6084774  | 0,5818477 | 0,5818477 | 0,6271564 | 0,5818477 |
| jhp_0119  | 0,9330708 | 0,9291338 | 0,9204152 | 0,9335665  | 0,9125874 | 0,9125874 | 0,8927336 | 0,9125874 |



suppl HP homology of 22 final candidates

| Gene name | HP UM023  | HP UM111  | HP UM084  | HP UM067  | HP UM085  | HP FD423  | HP FD430  | HP FD506  |
|-----------|-----------|-----------|-----------|-----------|-----------|-----------|-----------|-----------|
| jhp_1276  | 0,9520958 | 0,9461078 | 0,9702381 | 0,9702381 | 0,9461078 | 0,9642857 | 0,9476744 | 0,9520958 |
| jhp_0776  | 0,9408867 | 0,9463415 | 0,9609756 | 0,9658536 | 0,9609756 | 0,9560975 | 0,9609756 | 0,9707317 |
| jhp_0718  | 0,9370629 | 0,9370629 | 0,9259259 | 0,9259259 | 0,941725  | 0,9212963 | 0,9259259 | 0,9300699 |
| jhp_0552  | 0,9481328 | 0,9460581 | 0,9643606 | 0,9643606 | 0,9475891 | 0,9706499 | 0,966457  | 0,9481328 |
| jhp_0530  | 0,9209622 | 0         | 0,9146758 | 0,9078498 | 0,9140893 | 0,9078498 | 0,9146758 | 0,9175258 |
| jhp_0501  | 0,8722742 | 0,878125  | 0,8965517 | 0,90625   | 0,8878505 | 0,909375  | 0,896875  | 0,8875    |
| cagN      | 0,9346405 | 0,9346405 | 0,9313725 | 0,9575163 | 0,9379085 | 0,9444444 | 0,9509804 | 0,9248366 |
| orf17     | 0,9801587 | 0,984127  | 0,984127  | 0,9880952 | 0,9880952 | 0,9920635 | 0,9880952 | 0,9880952 |
| orf8      | 0,9313929 | 0,9355509 | 0,9355509 | 0,9290188 | 0,9331942 | 0,9290188 | 0,9313929 | 0,9269311 |
| orf6      | 0,9478261 | 0,9565217 | 0,9652174 | 0,9391304 | 0,9652174 | 0,973913  | 0,9478261 | 0,9565217 |
| jhp_0444  | 0,7107143 | 0,8964286 | 0,9035714 | 0,9035714 | 0,9172662 | 0,9142857 | 0,9035714 | 0,9035714 |
| jhp_0369  | 0,9260563 | 0,9260563 | 0,9285714 | 0,9157895 | 0,915493  | 0,9392857 | 0,9263158 | 0,9225352 |
| jhp_0173  | 0,8810409 | 0,8951311 | 0,8838952 | 0,8695652 | 0,8884758 | 0,869403  | 0,8689138 | 0,8951311 |
| jhp_0136  | 0,9411765 | 0,9558824 | 0,9411765 | 0,9411765 | 0,9411765 | 0,9411765 | 0,9117647 | 0,9558824 |
| lpp20     | 0,9885714 | 0,9885714 | 0,9885714 | 0,9828572 | 0,9942857 | 0,9885714 | 0,9828572 | 0,9942857 |
| jhp_1355  | 0,9589744 | 0,9641026 | 0,9538462 | 0,9692308 | 0,9589744 | 0,9692308 | 0,9538462 | 0,974359  |
| babB      | 0,8728814 | 0,8759019 | 0,886236  | 0,9335864 | 0,8929889 | 0,8918539 | 0,9214146 | 0,8617021 |
| jhp_1103  | 0,8640625 | 0,6990446 | 0,8602826 | 0,9183673 | 0,8375    | 0,4578652 | 0,878125  | 0,8697017 |
| babA      | 0,8923284 | 0,8690958 | 0,9041835 | 0,9027027 | 0,8815612 | 0,9063772 | 0,8855172 | 0,8528428 |
| jhp_0775  | 0,9950249 | 0,9950249 | 0,9900498 | 1         | 1         | 1         | 0,9863014 | 1         |
| Cag_14    | 0,94      | 0,6332777 | 0,5641558 | 0,5802048 | 0,9076479 | 0,8571429 | 0,8400504 | 0,9128386 |
| jhp_0119  | 0,9031142 | 0,9335665 | 0,9090909 | 0,9090909 | 0,9100346 | 0,8986014 | 0,9125874 | 0,9300699 |

suppl HP homology of 22 final candidates

| Gene name | HP FD535  | HP FD703  | HP FD719  | HP GC26   | HP BM012A | HP BM012S | HP CPY1313 |
|-----------|-----------|-----------|-----------|-----------|-----------|-----------|------------|
| jhp_1276  | 0,9476744 | 0,9642857 | 0,9702381 | 0,9580838 | 0,9702381 | 0,9702381 | 0,9520958  |
| jhp_0776  | 0,9707317 | 0,9707317 | 0,9658536 | 0,9609756 | 0,9560975 | 0,9560975 | 0,9507389  |
| jhp_0718  | 0,9207459 | 0,9187935 | 0,9236111 | 0,9300699 | 0,9324009 | 0,9324009 | 0,934732   |
| jhp_0552  | 0,9580713 | 0,9832285 | 0,9580713 | 0,9460581 | 0,9790356 | 0,9790356 | 0,9475891  |
| jhp_0530  | 0,9146758 | 0,9044369 | 0,9146758 | 0,9180887 | 0,9112628 | 0,9112628 | 0,9103943  |
| jhp_0501  | 0,9090909 | 0,90625   | 0,909375  | 0,8722742 | 0,8909658 | 0,8909658 | 0,8816199  |
| cagN      | 0,9248366 | 0,9542484 | 0,9444444 | 0,9248366 | 0,9411765 | 0,9411765 | 0,9444444  |
| orf17     | 0,9880952 | 0,9880952 | 0,9880952 | 0,984127  | 0,9920635 | 0,9920635 | 0,9880952  |
| orf8      | 0,9290188 | 0,9352818 | 0,9311064 | 0,9272349 | 0,929314  | 0,929314  | 0,9355509  |
| orf6      | 0,9565217 | 0,9652174 | 0,973913  | 0,9565217 | 0,9478261 | 0,9478261 | 0,9565217  |
| jhp_0444  | 0,8956835 | 0,9071429 | 0,9064748 | 0,7142857 | 0,910072  | 0,910072  | 0,7214286  |
| jhp_0369  | 0,9428571 | 0,9225352 | 0,9428571 | 0,9119718 | 0,9100346 | 0,9100346 | 0,9260563  |
| jhp_0173  | 0,9056604 | 0,8913858 | 0,8951311 | 0,8843284 | 0,8981132 | 0,8981132 | 0,8847584  |
| jhp_0136  | 0,9411765 | 0,9411765 | 0,9264706 | 0,9264706 | 0,9411765 | 0,9411765 | 0,9558824  |
| lpp20     | 0,9942857 | 0,9885714 | 0,9828572 | 0,9942857 | 0,9885714 | 0,9885714 | 0,9942857  |
| jhp_1355  | 0,974359  | 0,9538462 | 0,9692308 | 0,9589744 | 0,9641026 | 0,9641026 | 0,9593023  |
| babB      | 0,6572199 | 0,7632712 | 0,9192635 | 0,8833652 | 0,9134199 | 0,9150141 | 0,8578053  |
| jhp_1103  | 0,7165605 | 0,8644986 | 0,8871473 | 0,847352  | 0,7235387 | 0,7235387 | 0,8640625  |
| babA      | 0,910162  | 0,6728838 | 0,8975741 | 0,8566879 | 0,9030955 | 0,8934579 | 0,884097   |
| jhp_0775  | 0,9915966 | 0,9950249 | 0,9915254 | 1         | 0,9900498 | 0,9900498 | 0,9900498  |
| Cag_14    | 0,6144414 | 0,6185003 | 0,9298508 | 0,9125326 | 0,5670539 | 0,5670539 | 0,7215713  |
| jhp_0119  | 0,9160839 | 0,9055944 | 0,9090909 | 0,9230769 | 0,9335665 | 0,9335665 | 0,916955   |

suppl HP homology of 22 final candidates

| Gene name | HP SouthAfrica7 | HP SouthAfrica20 | HP CPY1662 | HP Shi470 | HP 51     | HP Sat464 | HP F32    |
|-----------|-----------------|------------------|------------|-----------|-----------|-----------|-----------|
| jhp_1276  | 0,9583333       | 0,9642857        | 0,9520958  | 0,9461078 | 0,9520958 | 0,9461078 | 0,9702381 |
| jhp_0776  | 0,9707317       | 0,9792746        | 0,9560975  | 0,9512195 | 0,9408867 | 0,9609756 | 0,9458128 |
| jhp_0718  | 0,9351852       | 0,8913044        | 0,9324009  | 0,934732  | 0,9300699 | 0,9393939 | 0,934732  |
| jhp_0552  | 0,9460581       | 0,9685535        | 0,9622642  | 0,932914  | 0,951782  | 0,9308176 | 0,9475891 |
| jhp_0530  | 0               | 0,8637993        | 0,9072165  | 0,9027778 | 0,9044369 | 0,8958333 | 0,90681   |
| jhp_0501  | 0,8006231       | 0,84             | 0,8816199  | 0,8364198 | 0,8847352 | 0,845679  | 0,8722742 |
| cagN      | 0               | 0                | 0,9313725  | 0,9313725 | 0,9248366 | 0         | 0,9444444 |
| orf17     | 0               | 0                | 0,984127   | 0,9801587 | 0,984127  | 0,9801587 | 0,9801587 |
| orf8      | 0               | 0,1232877        | 0,9272349  | 0,9313929 | 0,929314  | 0,8840864 | 0,929314  |
| orf6      | 0               | 0                | 0,9411765  | 0,9304348 | 0,9652174 | 0,9478261 | 0,9565217 |
| jhp_0444  | 0,8521127       | 0,8556338        | 0,7214286  | 0,8964286 | 0,6879433 | 0,8964286 | 0,725     |
| jhp_0369  | 0,9247312       | 0,9366197        | 0,929078   | 0,9190141 | 0,9166667 | 0,9225352 | 0,915493  |
| jhp_0173  | 0,8444445       | 0,862963         | 0,8876405  | 0,8884758 | 0,8921933 | 0,8884758 | 0,8614232 |
| jhp_0136  | 0,9264706       | 0,9264706        | 0,9264706  | 0,9411765 | 0,9411765 | 0,9411765 | 0,9558824 |
| lpp20     | 0,9828572       | 0,9885714        | 0,9942857  | 0,9942857 | 0,9885714 | 0,9885714 | 0,9885714 |
| jhp_1355  | 0,9641026       | 0,948718         | 0,9593023  | 0,974359  | 0,9538462 | 0,974359  | 0,9692308 |
| babB      | 0,7481805       | 0,822542         | 0,8852691  | 0,8707386 | 0,8787024 | 0,8828697 | 0,9134616 |
| jhp_1103  | 0,7149681       | 0,7135843        | 0,875      | 0,8237129 | 0,8746082 | 0,8140625 | 0,8890625 |
| babA      | 0,8828571       | 0,8365123        | 0,8650472  | 0,8438762 | 0,8812416 | 0,8425303 | 0,8672087 |
| jhp_0775  | 0,9850746       | 0,9900498        | 0,9950249  | 1         | 0,9950249 | 1         | 0,9950249 |
| Cag_14    | 0,5483871       | 0,1094891        | 0,6317421  | 0,5943905 | 0,6088083 | 0,63758   | 0,8016983 |
| jhp_0119  | 0,8710802       | 0,8638298        | 0,9105058  | 0,9100346 | 0,9134948 | 0,9031142 | 0,9230769 |

suppl HP homology of 22 final candidates

| Gene name | HP F57    | HP Shi417 | HP Shi169 | HP Shi112 | HP CPY1962 | HP CPY6081 | HP CPY6261 | HP CPY6271 |
|-----------|-----------|-----------|-----------|-----------|------------|------------|------------|------------|
| jhp_1276  | 0,9520958 | 0,9461078 | 0,9461078 | 0,9461078 | 0,9580838  | 0,9580838  | 0,9583333  | 0,9580838  |
| jhp_0776  | 0,9458128 | 0,9609756 | 0,9560975 | 0,9481865 | 0,9609756  | 0,9458128  | 0,9560975  | 0,9560975  |
| jhp_0718  | 0,9324009 | 0,934732  | 0,9324009 | 0,9324009 | 0,9370629  | 0,4355895  | 0,9300699  | 0,9324009  |
| jhp_0552  | 0,9454927 | 0,9266247 | 0,9287212 | 0,9371069 | 0,9454927  | 0,9475891  | 0,9350105  | 0,9580713  |
| jhp_0530  | 0,9103943 | 0,8986014 | 0,911032  | 0,9044369 | 0,9140893  | 0,9692308  | 0,9333333  | 0,9032258  |
| jhp_0501  | 0,8722742 | 0,8395061 | 0,8364198 | 0,8549383 | 0,8722742  | 0,8785047  | 0,8909658  | 0,8753894  |
| cagN      | 0,9313725 | 0,9313725 | 0,9281046 | 0,9281046 | 0,9313725  | 0,9281046  | 0,9444444  | 0,9183006  |
| orf17     | 0,984127  | 0,9801587 | 0,9761904 | 0,9722222 | 0,984127   | 0,9880952  | 0,984127   | 0,984127   |
| orf8      | 0,929314  | 0,9230769 | 0,9355509 | 0,9397089 | 0,929314   | 0,9313929  | 0,9209979  | 0,929314   |
| orf6      | 0,9478261 | 0,9304348 | 0,9304348 | 0,9304348 | 0,9318182  | 0,9565217  | 0,9478261  | 0,92       |
| jhp_0444  | 0,8047619 | 0,8162544 | 0,8928571 | 0,8928571 | 0,7107143  | 0,6843972  | 0,6950355  | 0,7178571  |
| jhp_0369  | 0,9260563 | 0,915493  | 0,915493  | 0,915493  | 0,9225352  | 0,9190141  | 0,915493   | 0,9225352  |
| jhp_0173  | 0,8884758 | 0,8830189 | 0,8773234 | 0,8830189 | 0,8996283  | 0,8921933  | 0,8921933  | 0,8847584  |
| jhp_0136  | 0,9264706 | 0,9411765 | 0,9411765 | 0,9264706 | 0,9411765  | 0,9411765  | 0,9705882  | 0,9411765  |
| lpp20     | 0,9885714 | 0,9942857 | 0,9942857 | 0,9942857 | 0,9942857  | 0,9885714  | 0,9885714  | 0,9942857  |
| jhp_1355  | 0,9651163 | 0,9692308 | 0,9692308 | 0,9692308 | 0,9651163  | 0,9589744  | 0,9692308  | 0,9641026  |
| babB      | 0,8775216 | 0,8799415 | 0,6449276 | 0,6448326 | 0,8909348  | 0,8690228  | 0,8810198  | 0,8388889  |
| jhp_1103  | 0,8734375 | 0,8244514 | 0,8275862 | 0,8221529 | 0,8673947  | 0,878125   | 0,8673947  | 0,8435055  |
| babA      | 0,8897849 | 0,8317631 | 0,8232931 | 0,8506666 | 0,9041835  | 0,8792867  | 0,8539007  | 0,8208662  |
| jhp_0775  | 0,9900498 | 1         | 1         | 0,9900498 | 0,9900498  | 0,9900498  | 0,9900498  | 0,9800995  |
| Cag_14    | 0,6037841 | 0,6349942 | 0,5890633 | 0,5906876 | 0,9126984  | 0,8732395  | 0,6141976  | 0,6311221  |
| jhp_0119  | 0,9134948 | 0,899654  | 0,9065744 | 0,899654  | 0,886076   | 0,8902954  | 0,8983051  | 0,9113924  |

suppl HP homology of 22 final candidates

| Gene name | HP A45    | HP UM038  | HP UM065  | HP UM077  | HP FD568  | HP FD577  | HP FD662  | HP oki154 |
|-----------|-----------|-----------|-----------|-----------|-----------|-----------|-----------|-----------|
| jhp_1276  | 0,9821429 | 0,9341317 | 0,9401197 | 0,9122807 | 0,9520958 | 0,9520958 | 0,9702381 | 0,9580838 |
| jhp_0776  | 0,9609756 | 0,9560975 | 0,9458128 | 0,9658536 | 0,9609756 | 0,9609756 | 0,9658536 | 0,9560975 |
| jhp_0718  | 0,9254079 | 0,9300699 | 0,9324009 | 0,9300699 | 0,934732  | 0,934732  | 0,9236111 | 0,9277389 |
| jhp_0552  | 0,9622642 | 0,9392034 | 0,93361   | 0,939834  | 0,9643606 | 0,9460581 | 0,9601677 | 0,9454927 |
| jhp_0530  | 0,9555556 | 0,9106529 | 0,9140893 | 0,9072165 | 0,9249147 | 0,9146758 | 0,9146758 | 0         |
| jhp_0501  | 0,8380063 | 0,8722742 | 0,8816199 | 0,875     | 0,8785047 | 0,8629283 | 0,9       | 0,8255452 |
| cagN      | 0         | 0,9183006 | 0,9379085 | 0,9346405 | 0,9313725 | 0,9346405 | 0,9411765 | 0         |
| orf17     | 0         | 0,9880952 | 0,984127  | 0,9880952 | 0,984127  | 0,9880952 | 0,9880952 | 0         |
| orf8      | 0         | 0,929314  | 0,9313929 | 0,929314  | 0,9334719 | 0,9251559 | 0,9290188 | 0         |
| orf6      | 0         | 0,9478261 | 0,9565217 | 0,9565217 | 0,9652174 | 0,9652174 | 0,9565217 | 0         |
| jhp_0444  | 0,9172662 | 0,8956835 | 0,6914893 | 0,9071429 | 0,7035714 | 0,7056738 | 0,8964286 | 0,9035714 |
| jhp_0369  | 0,9122807 | 0,9119718 | 0,9084507 | 0,915493  | 0,9119718 | 0,9260563 | 0,9285714 | 0,9330986 |
| jhp_0173  | 0,8876405 | 0,8921933 | 0,8847584 | 0,8996283 | 0,8847584 | 0,8880597 | 0,8913858 | 0,8847584 |
| jhp_0136  | 0,9264706 | 0,9411765 | 0,9705882 | 0,9411765 | 0,9361702 | 0,9705882 | 0,9411765 | 0,9264706 |
| lpp20     | 0,9828572 | 0,9942857 | 0,9885714 | 0,9885714 | 0,9828572 | 0,9885714 | 0,9828572 | 0,9942857 |
| jhp_1355  | 0,974359  | 0,9538462 | 0,9692308 | 0,9641026 | 0,9641026 | 0,9641026 | 0,9538462 | 0,9692308 |
| babB      | 0,9072753 | 0,7266776 | 0,8871201 | 0,8694267 | 0,8966005 | 0,8740458 | 0,9065156 | 0,9004329 |
| jhp_1103  | 0,7299843 | 0,8826291 | 0,8309859 | 0,8203125 | 0,8234375 | 0,8627145 | 0,8712871 | 0,7101911 |
| babA      | 0,7004279 | 0,8799392 | 0,6943662 | 0,8909883 | 0,8839428 | 0,8803763 | 0,8899456 | 0,8667564 |
| jhp_0775  | 0,9900498 | 1         | 0,9950249 | 0,9850746 | 1         | 0,9863014 | 0,9950249 | 0,9900498 |
| Cag_14    | 0,4888889 | 0,9291883 | 0,9106901 | 0,6021146 | 0,6087924 | 0,927242  | 0,9139942 | 0,2195767 |
| jhp_0119  | 0,958042  | 0,916955  | 0,899654  | 0,916955  | 0,9300699 | 0,9065744 | 0,9300699 | 0,9134948 |

suppl HP homology of 22 final candidates

| Gene name | HP oki673 | HP oki828 | HP Cuz20  | HP Puno120 | HP Puno135 | HP PeCan18 | HP Aklavik117 |
|-----------|-----------|-----------|-----------|------------|------------|------------|---------------|
| jhp_1276  | 0,9580838 | 0,9580838 | 0,9580838 | 0,9821429  | 0,9401197  | 0,9821429  | 0,9640719     |
| jhp_0776  | 0,9560975 | 0,9560975 | 0,9512195 | 0,9658536  | 0,9609756  | 0,9902439  | 0,9609756     |
| jhp_0718  | 0,9277389 | 0,9277389 | 0,9324009 | 0,9370629  | 0,9277389  | 0,9627039  | 0,9300699     |
| jhp_0552  | 0,9496855 | 0,9475891 | 0,9308176 | 0,9350105  | 0,932914   | 0,9685535  | 0,9287212     |
| jhp_0530  | 0,9106529 | 0,9106529 | 0,9072165 | 0,9078498  | 0,9106529  | 0,9658703  | 0,9027778     |
| jhp_0501  | 0,8224299 | 0,8255452 | 0,8611111 | 0,8703704  | 0,8487654  | 0,9657321  | 0,8302469     |
| cagN      | 0         | 0         | 0,9281046 | 0,9339934  | 0,9240924  | 0,9379085  | 0             |
| orf17     | 0         | 0         | 0,9880952 | 0,9801587  | 0,9801587  | 0,984127   | 0             |
| orf8      | 0         | 0         | 0,9355509 | 0,929314   | 0,9376299  | 0,983368   | 0             |
| orf6      | 0         | 0         | 0,9304348 | 0,9478261  | 0,9391304  | 0,973913   | 0,1142857     |
| jhp_0444  | 0,9035714 | 0,9035714 | 0,8892857 | 0,8510638  | 0,7833935  | 0,9071429  | 0,6308244     |
| jhp_0369  | 0,915493  | 0,929078  | 0,9260563 | 0,9190141  | 0,9119718  | 0,9824561  | 0,9260563     |
| jhp_0173  | 0,8847584 | 0,9029851 | 0,8943396 | 0,8773234  | 0,8773234  | 0,8838952  | 0,8401487     |
| jhp_0136  | 0,9264706 | 0,8630137 | 0,9411765 | 0,9411765  | 0,9411765  | 0,9705882  | 0,9558824     |
| lpp20     | 0,9942857 | 0,9942857 | 0,9942857 | 0,9942857  | 0,9942857  | 0,9942857  | 0,9942857     |
| jhp_1355  | 0,9692308 | 0,9692308 | 0,9692308 | 0,9692308  | 0,9692308  | 0,9948718  | 0,9641026     |
| babB      | 0,6675676 | 0,6581427 | 0,822335  | 0,8828697  | 0,8711566  | 0,9224012  | 0,7403561     |
| jhp_1103  | 0,7085987 | 0,7117835 | 0,830721  | 0,8141026  | 0,8127925  | 0,9233177  | 0,7245223     |
| babA      | 0,8679505 | 0,8696237 | 0,8211382 | 0,8364611  | 0,8485255  | 0,8598131  | 0,8623482     |
| jhp_0775  | 0,9900498 | 0,9850746 | 1         | 0,9950249  | 1          | 0,9950249  | 0,9950249     |
| Cag_14    | 0,2195767 | 0,2195767 | 0,861461  | 0,5917504  | 0,5961435  | 0,612684   | 0,7012987     |
| jhp_0119  | 0,916955  | 0,916955  | 0,899654  | 0,9134948  | 0,9134948  | 0,9824561  | 0,9100346     |

suppl HP homology of 22 final candidates

| Gene name | HP NQ4216 | HP Hp H-16 | HP Hp A-14 | HP Hp P-13 | HP R038b  | HP GAM103Bi | HP GAM105Ai |
|-----------|-----------|------------|------------|------------|-----------|-------------|-------------|
| jhp_1276  | 0,9821429 | 0,9821429  | 0,9761904  | 0,96875    | 0,9761904 | 0,9593023   | 0,98125     |
| jhp_0776  | 0,9853659 | 0,9804878  | 0,9756098  | 0,987013   | 0,9792746 | 1           | 1           |
| jhp_0718  | 0,9463869 | 0,9440559  | 0,941725   | 0,983683   | 0,9393939 | 0,9779412   | 0,9779412   |
| jhp_0552  | 0,9268817 | 0,9595745  | 0,9853249  | 0,9569892  | 0,9827957 | 0,9553192   | 0,9322382   |
| jhp_0530  | 0,9125874 | 0,9537367  | 0,9060403  | 0,9846154  | 0,8805461 | 0,9010239   | 0,9846154   |
| jhp_0501  | 0,9444444 | 0,9844237  | 0,8785047  | 0,9750779  | 0,8691589 | 0,9688473   | 0,9719626   |
| cagN      | 0,9738562 | 0,9705882  | 0          | 0,9673203  | 0         | 0,9738562   | 0,9738562   |
| orf17     | 0,984127  | 0,9801587  | 0          | 0,984127   | 0,1836735 | 0,984127    | 0,984127    |
| orf8      | 0,9334719 | 0,9723404  | 0          | 0,9723404  | 0         | 0,983368    | 0,970894    |
| orf6      | 0,9558824 | 0,96       | 0          | 0,9772727  | 0         | 0,9913043   | 0,973913    |
| jhp_0444  | 0,9139785 | 0,9539007  | 0,8992805  | 0,964539   | 0,9208633 | 0,964539    | 0,9539007   |
| jhp_0369  | 0,922807  | 0,9192982  | 0,9263158  | 0,9789473  | 0,9074074 | 0,9964913   | 0,9789473   |
| jhp_0173  | 0,9185185 | 0,9814126  | 0,8838952  | 0,9776952  | 0,9144982 | 0,9739777   | 0,9851301   |
| jhp_0136  | 0,9558824 | 0,9558824  | 0,9411765  | 0,9705882  | 0,9411765 | 0,9705882   | 0,9705882   |
| lpp20     | 0,9942857 | 0,9942857  | 0,9942857  | 0,9942857  | 1         | 0,9942857   | 0,9942857   |
| jhp_1355  | 0,9709302 | 0,9846154  | 0,974359   | 0,994186   | 0,9767442 | 0,9883721   | 0,9767442   |
| babB      | 0,8298969 | 0,9121523  | 0,6739131  | 0,9267936  | 0,9040903 | 0,8702461   | 0,6495845   |
| jhp_1103  | 0,859375  | 0,9407176  | 0,7302839  | 0,91875    | 0,7161084 | 0,9140625   | 0,9232026   |
| babA      | 0,8398876 | 0,8775235  | 0,7119565  | 0,8857527  | 0,7207334 | 0,8552036   | 0,9058172   |
| jhp_0775  | 0,9900498 | 0,9950249  | 0,9900498  | 0,9950249  | 0,9900498 | 0,9054054   | 0,9054054   |
| Cag_14    | 0,6144414 | 0,6414662  | 0,2195767  | 0,9953271  | 0,2340426 | 0,9829457   | 0,9863014   |
| jhp_0119  | 0,9824561 | 0,9894737  | 0,9230769  | 0,9828326  | 0,9370629 | 0,9894737   | 0,9894737   |

suppl HP homology of 22 final candidates

| Gene name | HP GAM115Ai | HP GAM112Ai | HP GAM119Bi | HP GAM120Ai | HP GAM244Ai | HP GAM245Ai |
|-----------|-------------|-------------|-------------|-------------|-------------|-------------|
| jhp_1276  | 0,9593023   | 0,9761904   | 0,975       | 0,9593023   | 0,9593023   | 0,975       |
| jhp_0776  | 0,9896373   | 0,9948186   | 0,9756098   | 0,9740933   | 1           | 1           |
| jhp_0718  | 0,948718    | 0,9393939   | 0,9803922   | 0,9440559   | 0,9757282   | 0,948718    |
| jhp_0552  | 0,9510638   | 0,9489362   | 0,9574468   | 0,9574468   | 0,9531915   | 0,9531915   |
| jhp_0530  | 0,9078498   | 0,8839591   | 0,9112628   | 0,9846154   | 0,9112628   | 0,890785    |
| jhp_0501  | 0,9657321   | 0,9719626   | 0,9719626   | 0,9750779   | 0,9439253   | 0,9626168   |
| cagN      | 0,9640523   | 1           | 0,9640523   | 0,9640523   | 0           | 0,9738562   |
| orf17     | 0,984127    | 0,9801587   | 0,9801587   | 0,9801587   | 0           | 0,9801587   |
| orf8      | 0,970894    | 0,983368    | 0,975052    | 0,975052    | 0           | 0,972973    |
| orf6      | 0,9826087   | 0,9826087   | 0,9652174   | 1           | 0           | 0,9826087   |
| jhp_0444  | 0,964539    | 0,9574468   | 0,9700375   | 0,9357143   | 0,9245283   | 0,5698925   |
| jhp_0369  | 0,9929824   | 0,9929824   | 0,9929824   | 0,9723184   | 0,9578947   | 0,9929824   |
| jhp_0173  | 0,9776952   | 0,9739777   | 0,9850746   | 0,9776952   | 0,9813433   | 0,9851301   |
| jhp_0136  | 0,9705882   | 0,9705882   | 0,9705882   | 0,9264706   | 0,9264706   | 0,9705882   |
| lpp20     | 1           | 0,9885714   | 0,9885714   | 1           | 0,9885714   | 0,9942857   |
| jhp_1355  | 0,9767442   | 0,994186    | 0,9709302   | 0,9825581   | 0,9825581   | 0,994186    |
| babB      | 0,8932714   | 0,9405941   | 0,9322034   | 0,9017094   | 0,936       | 0,9084821   |
| jhp_1103  | 0,9002079   | 0,9248827   | 0,8833593   | 0,9375975   | 0,7393365   | 0,9296875   |
| babA      | 0,8568075   | 0,8685613   | 0,846678    | 0,8577154   | 0           | 0,842572    |
| jhp_0775  | 0,9054054   | 0,9009009   | 0,8963964   | 0,8963964   | 0,9009009   | 0,9054054   |
| Cag_14    | 0,9964539   | 0,9949833   | 0,993311    | 0,9911972   | 0,2248677   | 0,991342    |
| jhp_0119  | 0,9894737   | 0,9894737   | 0,9824561   | 0,9894737   | 0,9824561   | 0,9894737   |



suppl HP homology of 22 final candidates

| Gene name | HP GAM246Ai | HP GAM250T | HP GAM252Bi | HP GAM260Bi | HP GAM260BSi | HP GAM263BFi |
|-----------|-------------|------------|-------------|-------------|--------------|--------------|
| jhp_1276  | 0,9761904   | 0,9821429  | 0,9821429   | 0,9821429   | 0,9534883    | 0,98125      |
| jhp_0776  | 0,9948186   | 0,9896373  | 0,9896373   | 0,9804878   | 0,9740933    | 0,9740933    |
| jhp_0718  | 0,9681373   | 0,9730392  | 0,9730392   | 0,9785523   | 0,9754902    | 0,9681373    |
| jhp_0552  | 0,9425532   | 0,9553192  | 0,9553192   | 0,9643606   | 0,9702128    | 0,926078     |
| jhp_0530  | 0,9624574   | 0,9078498  | 0,9078498   | 0,9624574   | 0,9078498    | 0,9624574    |
| jhp_0501  | 0,9688473   | 0,9719626  | 0,9719626   | 0,9719626   | 0,845679     | 0,9688473    |
| cagN      | 0,9771242   | 0,9673203  | 0,9673203   | 0,9607843   | 0            | 0,9705882    |
| orf17     | 0,984127    | 0,9801587  | 0,9801587   | 0,984127    | 0            | 0,9801587    |
| orf8      | 0,981289    | 0,975052   | 0,975052    | 0,972973    | 0            | 0,97921      |
| orf6      | 0,9826087   | 0,9913043  | 0,9913043   | 0,9826087   | 0            | 0,973913     |
| jhp_0444  | 0,964539    | 0,964539   | 0,964539    | 0,9539007   | 0,863924     | 0,9539007    |
| jhp_0369  | 0,9929824   | 0,9894737  | 0,9894737   | 0,9929824   | 0,9824561    | 0,9894737    |
| jhp_0173  | 0,9814126   | 0,9851301  | 0,9851301   | 0,9851301   | 0,9814126    | 0,9739777    |
| jhp_0136  | 0,9705882   | 0,9558824  | 0,9558824   | 0,9705882   | 0,9558824    | 0,9705882    |
| lpp20     | 0,9885714   | 1          | 1           | 0,9942857   | 0,9885714    | 0,9942857    |
| jhp_1355  | 0,9825581   | 0,9883721  | 0,9883721   | 0,9767442   | 0,9883721    | 0,9767442    |
| babB      | 0,8992974   | 0,9149485  | 0,9105883   | 0,8827434   | 0,9536232    | 0,923833     |
| jhp_1103  | 0,9188768   | 0,9265625  | 0,9265625   | 0,9391575   | 0,7472354    | 0,915625     |
| babA      | 0,82881     | 0,8106904  | 0,8251029   | 0,8407225   | 0,7          | 0,8398169    |
| jhp_0775  | 0,9009009   | 0,9901478  | 0,9901478   | 0,9009009   | 0,9802955    | 0,8963964    |
| Cag_14    | 0,9934211   | 0,9966997  | 0,9966997   | 0,9957447   | 0,2248677    | 0,9795159    |
| jhp_0119  | 1           | 0,9894737  | 0,9894737   | 0,9894737   | 0,968421     | 0,9894737    |

suppl HP homology of 22 final candidates

| Gene name | HP GAM268Bii | HP GAM80Ai | HP GAM71Ai | HP GAM83Bi | HP GAMchJs106B | HP HP250AFiii |
|-----------|--------------|------------|------------|------------|----------------|---------------|
| jhp_1276  | 0,975        | 0,98125    | 0,98125    | 0,9761904  | 0,9593023      | 0,98125       |
| jhp_0776  | 1            | 1          | 0,9637306  | 0,9637306  | 0,9896373      | 0,9896373     |
| jhp_0718  | 0,9681373    | 0,9812332  | 0,9828432  | 0,9730392  | 0,9865952      | 0,9730392     |
| jhp_0552  | 0,9489362    | 0,9553192  | 0,9489362  | 0,9744681  | 0,9748428      | 0,9553192     |
| jhp_0530  | 0,9846154    | 0,9078498  | 0,8941979  | 0,9692833  | 0,8976109      | 0,9078498     |
| jhp_0501  | 0,9595016    | 0,9657321  | 0,9252337  | 0,9252337  | 0,9439253      | 0,9719626     |
| cagN      | 0,9705882    | 0,9673203  | 0          | 0          | 0              | 0,9673203     |
| orf17     | 0,984127     | 0,984127   | 0          | 0          | 0              | 0,9801587     |
| orf8      | 0,975052     | 0,97921    | 0          | 0          | 0              | 0,975052      |
| orf6      | 0,9652174    | 0,9652174  | 0          | 0          | 0              | 0,9913043     |
| jhp_0444  | 0,9609929    | 0,6353791  | 0,9625468  | 0,9214286  | 0,9574468      | 0,964539      |
| jhp_0369  | 0,9859649    | 0,9859649  | 0,9688581  | 0,9789473  | 0,9723184      | 0,9894737     |
| jhp_0173  | 0,9814126    | 0,9813433  | 0,9628253  | 0,9701493  | 0,9888476      | 0,9851301     |
| jhp_0136  | 0,9264706    | 0,9411765  | 0,9705882  | 0,9705882  | 0,9705882      | 0,9558824     |
| lpp20     | 0,9885714    | 0,9942857  | 0,9885714  | 0,9885714  | 0,9828572      | 1             |
| jhp_1355  | 0,9825581    | 0,994186   | 0,9883721  | 0,9883721  | 0,9825581      | 0,9883721     |
| babB      | 0,8853503    | 0,9181669  | 0,9416059  | 0,9265823  | 0,6481481      | 0,9105883     |
| jhp_1103  | 0,9174455    | 0,9329173  | 0,7379095  | 0,7563291  | 0,7551343      | 0,9228188     |
| babA      | 0,8263598    | 0,8830645  | 0,6028985  | 0,8232759  | 0,838843       | 0,8251029     |
| jhp_0775  | 0,9054054    | 0,9054054  | 0,9852217  | 0,9009009  | 0,8963964      | 0,9901478     |
| Cag_14    | 0,9964222    | 0,9946524  | 0,2161458  | 0,2420213  | 0,2195767      | 0,9966997     |
| jhp_0119  | 0,9855596    | 0,9859649  | 0,968421   | 0,9719298  | 0,979021       | 0,9894737     |

suppl HP homology of 22 final candidates

| Gene name | HP HP250AFii | HP HP250AFiV | HP HP250BFiii | HP HP250BFi | HP HP250BSi | HP HP260ASii | HP HP260Bi |
|-----------|--------------|--------------|---------------|-------------|-------------|--------------|------------|
| jhp_1276  | 0,9821429    | 0,9821429    | 0,9821429     | 0,9821429   | 0,98125     | 0,975        | 0,98125    |
| jhp_0776  | 0,9896373    | 0,9896373    | 0,9896373     | 0,9896373   | 0,9896373   | 1            | 0,9804878  |
| jhp_0718  | 0,9730392    | 0,9730392    | 0,9730392     | 0,9730392   | 0,9730392   | 0,9681373    | 0,9785523  |
| jhp_0552  | 0,9553192    | 0,9553192    | 0,9553192     | 0,9553192   | 0,9531915   | 0,9489362    | 0,9643606  |
| jhp_0530  | 0,9078498    | 0,9078498    | 0,9078498     | 0,9078498   | 0,9078498   | 0,9556314    | 0,9624574  |
| jhp_0501  | 0,9719626    | 0,9719626    | 0,9719626     | 0,9719626   | 0,9719626   | 0,9595016    | 0,9719626  |
| cagN      | 0,9673203    | 0,9673203    | 0,9673203     | 0,9673203   | 0,9673203   | 0,9705882    | 0,9607843  |
| orf17     | 0,9801587    | 0,9801587    | 0,9801587     | 0,9801587   | 0,9801587   | 0,984127     | 0,984127   |
| orf8      | 0,975052     | 0,975052     | 0,975052      | 0,975052    | 0,975052    | 0,975052     | 0,972973   |
| orf6      | 0,9913043    | 0,9913043    | 0,9913043     | 0,9913043   | 0,9913043   | 0,9652174    | 0,9826087  |
| jhp_0444  | 0,964539     | 0,964539     | 0,964539      | 0,964539    | 0,964539    | 0,9609929    | 0,9539007  |
| jhp_0369  | 0,9894737    | 0,9894737    | 0,9894737     | 0,9894737   | 0,9894737   | 0,9859649    | 0,9929824  |
| jhp_0173  | 0,9851301    | 0,9851301    | 0,9851301     | 0,9851301   | 0,9851301   | 0,9814126    | 0,9851301  |
| jhp_0136  | 0,9558824    | 0,9558824    | 0,9558824     | 0,9558824   | 0,9558824   | 0,9264706    | 0,9705882  |
| lpp20     | 1            | 1            | 1             | 1           | 1           | 0,9885714    | 0,9942857  |
| jhp_1355  | 0,9883721    | 0,9883721    | 0,9883721     | 0,9883721   | 0,9883721   | 0,9825581    | 0,9767442  |
| babB      | 0,9103774    | 0,9105883    | 0,9093024     | 0,8936651   | 0,9105883   | 0,8855932    | 0,9390787  |
| jhp_1103  | 0,9263323    | 0,9265625    | 0,9265625     | 0,9265625   | 0,9244967   | 0,9228188    | 0,9391575  |
| babA      | 0,8247423    | 0,8251029    | 0,8349328     | 0,8251029   | 0,8230453   | 0,8267223    | 0,8298246  |
| jhp_0775  | 0,9901478    | 0,9901478    | 0,9901478     | 0,9571428   | 0,9901478   | 0,9054054    | 0,9009009  |
| Cag_14    | 0,9811617    | 0,9858934    | 0,9966997     | 0,9964285   | 0,9966997   | 0,9964285    | 0,9890411  |
| jhp_0119  | 0,9894737    | 0,9894737    | 0,9894737     | 0,9894737   | 0,9894737   | 0,9859649    | 0,9894737  |

suppl HP homology of 22 final candidates

| Gene name | HP GAMchJs117Ai | HP Hp A-27 | HP B128   | HP 98-10  | HP Aklavik86 | HP SouthAfrica50 | HP XZ274  |
|-----------|-----------------|------------|-----------|-----------|--------------|------------------|-----------|
| jhp_1276  | 0,9593023       | 0,9642857  | 0,9642857 | 0,9580838 | 0,9580838    | 0,9642857        | 0,9461078 |
| jhp_0776  | 0,9609756       | 0,9707317  | 0,9609756 | 0,9533679 | 0,9073171    | 0,9804878        | 0,9585492 |
| jhp_0718  | 0,9828432       | 0,9230769  | 0,9254079 | 0,9324009 | 0,8530806    | 0,9088785        | 0,9236111 |
| jhp_0552  | 0,9531915       | 0,9874214  | 0,9811321 | 0,9433962 | 0,9054622    | 0,9622642        | 0,9748428 |
| jhp_0530  | 0,9419795       | 0,8255033  | 0,9538462 | 0,9145908 | 0,8532423    | 0,9555556        | 0         |
| jhp_0501  | 0,9376947       | 0,8958333  | 0,8785047 | 0,8722742 | 0,8518519    | 0,84             | 0         |
| cagN      | 0               | 0,9542484  | 0,9512987 | 0,9281046 | 0            | 0                | 0,9477124 |
| orf17     | 0               | 0,9801587  | 0,9880952 | 0,984127  | 0            | 0                | 0,9801587 |
| orf8      | 0               | 0,9313929  | 0,9334719 | 0,9313929 | 0            | 0                | 0,929314  |
| orf6      | 0               | 0,9431818  | 0,9565217 | 0,9565217 | 0,1061224    | 0                | 0,9204546 |
| jhp_0444  | 0,9574468       | 0,910072   | 0,9064748 | 0,7107143 | 0,6379929    | 0,8521127        | 0,6843972 |
| jhp_0369  | 0,9859649       | 0,9285714  | 0,9190141 | 0,9225352 | 0,9263158    | 0,9726776        | 0,6593407 |
| jhp_0173  | 0,9813433       | 0,9026217  | 0,8943396 | 0,8810409 | 0,8167939    | 0,9215686        | 0,8876405 |
| jhp_0136  | 0,9558824       | 0,9411765  | 0,9411765 | 0,9264706 | 0,9264706    | 0,9264706        | 0,9558824 |
| lpp20     | 0,9942857       | 0,9942857  | 0,9942857 | 0,9942857 | 0,875        | 0,9815951        | 0,9942857 |
| jhp_1355  | 0,994186        | 0,9767442  | 0,9767442 | 0,9534883 | 0,8082902    | 0,9473684        | 0         |
| babB      | 0,8892922       | 0,890873   | 0,6343179 | 0         | 0,7606061    | 0,6402684        | 0,8668555 |
| jhp_1103  | 0,7539432       | 0,7156398  | 0,8571429 | 0,8734375 | 0,7791602    | 0,7093596        | 0,8642746 |
| babA      | 0,8508287       | 0,9179416  | 0,5710267 | 0         | 0,5818182    | 0,8013423        | 0,8869448 |
| jhp_0775  | 0,8963964       | 0,9850746  | 0,9900498 | 0,9900498 | 0,9701493    | 0,9850746        | 0,952381  |
| Cag_14    | 0,2169312       | 0,9385066  | 0,9731286 | 0,9692898 | 0,2222222    | 0,3382353        | 0,2195767 |
| jhp_0119  | 0,979021        | 0,9300699  | 0,9440559 | 0,894958  | 0,7260274    | 0,8680851        | 0,9027237 |

suppl HP homology of 22 final candidates

| Gene name | HP NCTC 11639 | HP NCTC 11638 | HP 17874  | Mean      | Median    | Standard deviation | candidates |
|-----------|---------------|---------------|-----------|-----------|-----------|--------------------|------------|
| jhp_1276  | 0             | 0             | 0         | 0,9698205 | 0,9761904 | 0,01264208         |            |
| jhp_0776  | 0             | 0             | 0         | 0,9751106 | 0,9756098 | 0,01516785         |            |
| jhp_0718  | 0             | 0             | 0         | 0,9481373 | 0,9440559 | 0,03890266         |            |
| jhp_0552  | 0             | 0             | 0         | 0,9584161 | 0,9553192 | 0,01644781         | +          |
| jhp_0530  | 0             | 0             | 0         | 0,9241456 | 0,9112628 | 0,03852428         |            |
| jhp_0501  | 0             | 0             | 0         | 0,9232218 | 0,9314642 | 0,04684715         |            |
| cagN      | 0             | 0             | 0         | 0,9539809 | 0,9640523 | 0,04911292         |            |
| orf17     | 0             | 0             | 0         | 0,9681488 | 0,984127  | 0,110493           |            |
| orf8      | 0             | 0             | 0         | 0,9482275 | 0,9619565 | 0,06818441         |            |
| orf6      | 0             | 0             | 0         | 0,9484594 | 0,9652174 | 0,101003           |            |
| jhp_0444  | 0,2730924     | 0             | 0         | 0,8776104 | 0,913669  | 0,113657           |            |
| jhp_0369  | 0             | 0             | 0         | 0,9513015 | 0,9578947 | 0,03697531         |            |
| jhp_0173  | 0             | 0             | 0         | 0,9310722 | 0,9215686 | 0,04727668         | +          |
| jhp_0136  | 0             | 0             | 0         | 0,9506054 | 0,9411765 | 0,01846857         |            |
| lpp20     | 0,9942857     | 0             | 0,9885714 | 0,9921326 | 0,9942857 | 0,008482707        |            |
| jhp_1355  | 0             | 0             | 0         | 0,9766062 | 0,9794872 | 0,01727135         |            |
| babB      | 0             | 0             | 0         | 0,8585936 | 0,8992974 | 0,09947606         |            |
| jhp_1103  | 0             | 0             | 0         | 0,8582215 | 0,8819562 | 0,08066645         | +          |
| babA      | 0             | 0             | 0         | 0,8398964 | 0,8651804 | 0,08360647         |            |
| jhp_0775  | 0             | 0             | 0         | 0,9763989 | 0,9900498 | 0,03385496         | +          |
| Cag_14    | 0             | 0             | 0         | 0,6989317 | 0,6658522 | 0,273308           |            |
| jhp_0119  | 0             | 0             | 0         | 0,9505576 | 0,9597902 | 0,03750733         | +          |

suppl HP homology of 22 final candidates

| Gene name | <33% in bacteria conservation | <5% conservation and -log10 evalue < 1 in human | Protein name      |
|-----------|-------------------------------|-------------------------------------------------|-------------------|
| jhp_1276  | +                             | +                                               |                   |
| jhp_0776  | +                             | +                                               |                   |
| jhp_0718  | +                             | +                                               |                   |
| jhp_0552  | +                             | +                                               |                   |
| jhp_0530  | +                             | +                                               |                   |
| jhp_0501  | +                             | +                                               |                   |
| cagN      | +                             | +                                               |                   |
| orf17     | +                             | +                                               |                   |
| orf8      | +                             | +                                               |                   |
| orf6      | +                             | +                                               |                   |
| jhp_0444  | +                             | +                                               |                   |
| jhp_0369  | +                             | +                                               |                   |
| jhp_0173  | +                             | +                                               |                   |
| jhp_0136  | +                             | +                                               |                   |
| lpp20     | +                             | +                                               | LPP20 lipoprotein |
| jhp_1355  | +                             | +                                               |                   |
| babB      | +                             | +                                               |                   |
| jhp_1103  | +                             | +                                               |                   |
| babA      | +                             | +                                               |                   |
| jhp_0775  | +                             | +                                               |                   |
| Cag_14    | +                             | +                                               |                   |
| jhp_0119  | +                             | +                                               |                   |

suppl HP homology of 22 final candidates

| Gene name | Name   | Gene name |
|-----------|--------|-----------|
| jhp_1276  | Q9ZJM9 | jhp_1276  |
| jhp_0776  | Q9ZL06 | jhp_0776  |
| jhp_0718  | Q9ZL62 | jhp_0718  |
| jhp_0552  | Q9ZLM7 | jhp_0552  |
| jhp_0530  | Q9ZLP8 | jhp_0530  |
| jhp_0501  | Q9ZLS6 | jhp_0501  |
| cagN      | Q9ZLU0 | cagN      |
| orf17     | Q9ZLU7 | orf17     |
| orf8      | Q9ZLV5 | orf8      |
| orf6      | Q9ZLV7 | orf6      |
| jhp_0444  | Q9ZLY2 | jhp_0444  |
| jhp_0369  | Q9ZM54 | jhp_0369  |
| jhp_0173  | Q9ZMP5 | jhp_0173  |
| jhp_0136  | Q9ZMT2 | jhp_0136  |
| lpp20     | P0A0V1 | lpp20     |
| jhp_1355  | Q9ZJF7 | jhp_1355  |
| babB      | Q9ZJY3 | babB      |
| jhp_1103  | Q9ZK39 | jhp_1103  |
| babA      | Q9ZKV2 | babA      |
| jhp_0775  | Q9ZL07 | jhp_0775  |
| Cag_14    | Q9ZLV0 | 14        |
| jhp_0119  | Q9ZMU8 | jhp_0119  |

## suppl protein table

Intensity CF\_10\_1  
Intensity CF\_10\_2  
Intensity CF\_10\_3  
Intensity CF\_10\_4  
Intensity CF\_20\_1  
Intensity CF\_20\_2  
Intensity CF\_20\_3  
Intensity CF\_20\_4  
Intensity CF\_30\_1  
Intensity CF\_30\_2  
Intensity CF\_30\_3  
Intensity CF\_30\_4  
Intensity CU\_10\_1  
Intensity CU\_10\_2  
Intensity CU\_10\_3  
Intensity CU\_10\_4  
Intensity CU\_20\_1  
Intensity CU\_20\_2  
Intensity CU\_20\_3  
Intensity CU\_20\_4  
Intensity CU\_30\_1  
Intensity CU\_30\_2  
Intensity CU\_30\_3  
Intensity CU\_30\_4  
Intensity PF\_1  
Intensity PF\_2  
Intensity PF\_3  
Intensity PF\_4  
Intensity PU\_1  
Intensity PU\_2  
Intensity PU\_3  
Intensity PU\_4  
Intensity TF\_10\_1  
Intensity TF\_10\_2  
Intensity TF\_10\_3  
Intensity TF\_10\_4  
Intensity TF\_20\_1  
Intensity TF\_20\_2  
Intensity TF\_20\_3  
Intensity TF\_20\_4  
Intensity TF\_30\_1  
Intensity TF\_30\_2  
Intensity TF\_30\_3  
Intensity TF\_30\_4  
Intensity TU\_10\_1  
Intensity TU\_10\_2  
Intensity TU\_10\_3  
Intensity TU\_10\_4  
Intensity TU\_20\_1  
Intensity TU\_20\_2



Intensity TU\_20\_3  
Intensity TU\_20\_4  
Intensity TU\_30\_1  
Intensity TU\_30\_2  
Intensity TU\_30\_3  
Intensity TU\_30\_4  
iBAQ CF\_10\_1  
iBAQ CF\_10\_2  
iBAQ CF\_10\_3  
iBAQ CF\_10\_4  
iBAQ CF\_20\_1  
iBAQ CF\_20\_2  
iBAQ CF\_20\_3  
iBAQ CF\_20\_4  
iBAQ CF\_30\_1  
iBAQ CF\_30\_2  
iBAQ CF\_30\_3  
iBAQ CF\_30\_4  
iBAQ CU\_10\_1  
iBAQ CU\_10\_2  
iBAQ CU\_10\_3  
iBAQ CU\_10\_4  
iBAQ CU\_20\_1  
iBAQ CU\_20\_2  
iBAQ CU\_20\_3  
iBAQ CU\_20\_4  
iBAQ CU\_30\_1  
iBAQ CU\_30\_2  
iBAQ CU\_30\_3  
iBAQ CU\_30\_4  
iBAQ PF\_1  
iBAQ PF\_2  
iBAQ PF\_3  
iBAQ PF\_4  
iBAQ PU\_1  
iBAQ PU\_2  
iBAQ PU\_3  
iBAQ PU\_4  
iBAQ TF\_10\_1  
iBAQ TF\_10\_2  
iBAQ TF\_10\_3  
iBAQ TF\_10\_4  
iBAQ TF\_20\_1  
iBAQ TF\_20\_2  
iBAQ TF\_20\_3  
iBAQ TF\_20\_4  
iBAQ TF\_30\_1  
iBAQ TF\_30\_2  
iBAQ TF\_30\_3  
iBAQ TF\_30\_4

iBAQ TU\_10\_1  
iBAQ TU\_10\_2  
iBAQ TU\_10\_3  
iBAQ TU\_10\_4  
iBAQ TU\_20\_1  
iBAQ TU\_20\_2  
iBAQ TU\_20\_3  
iBAQ TU\_20\_4  
iBAQ TU\_30\_1  
iBAQ TU\_30\_2  
iBAQ TU\_30\_3  
iBAQ TU\_30\_4  
LFQ intensity CF\_10\_1  
LFQ intensity CF\_10\_2  
LFQ intensity CF\_10\_3  
LFQ intensity CF\_10\_4  
LFQ intensity CF\_20\_1  
LFQ intensity CF\_20\_2  
LFQ intensity CF\_20\_3  
LFQ intensity CF\_20\_4  
LFQ intensity CF\_30\_1  
LFQ intensity CF\_30\_2  
LFQ intensity CF\_30\_3  
LFQ intensity CF\_30\_4  
LFQ intensity CU\_10\_1  
LFQ intensity CU\_10\_2  
LFQ intensity CU\_10\_3  
LFQ intensity CU\_10\_4  
LFQ intensity CU\_20\_1  
LFQ intensity CU\_20\_2  
LFQ intensity CU\_20\_3  
LFQ intensity CU\_20\_4  
LFQ intensity CU\_30\_1  
LFQ intensity CU\_30\_2  
LFQ intensity CU\_30\_3  
LFQ intensity CU\_30\_4  
LFQ intensity PF\_1  
LFQ intensity PF\_2  
LFQ intensity PF\_3  
LFQ intensity PF\_4  
LFQ intensity PU\_1  
LFQ intensity PU\_2  
LFQ intensity PU\_3  
LFQ intensity PU\_4  
LFQ intensity TF\_10\_1  
LFQ intensity TF\_10\_2  
LFQ intensity TF\_10\_3  
LFQ intensity TF\_10\_4  
LFQ intensity TF\_20\_1  
LFQ intensity TF\_20\_2

LFQ intensity TF\_20\_3  
LFQ intensity TF\_20\_4  
LFQ intensity TF\_30\_1  
LFQ intensity TF\_30\_2  
LFQ intensity TF\_30\_3  
LFQ intensity TF\_30\_4  
LFQ intensity TU\_10\_1  
LFQ intensity TU\_10\_2  
LFQ intensity TU\_10\_3  
LFQ intensity TU\_10\_4  
LFQ intensity TU\_20\_1  
LFQ intensity TU\_20\_2  
LFQ intensity TU\_20\_3  
LFQ intensity TU\_20\_4  
LFQ intensity TU\_30\_1  
LFQ intensity TU\_30\_2  
LFQ intensity TU\_30\_3  
LFQ intensity TU\_30\_4  
GOBP slim name  
GOCC slim name  
GOMF name  
KEGG name  
Keywords  
Peptides  
Unique peptides  
Sequence coverage [%]  
Mol. weight [kDa]  
Majority protein IDs  
Gene name

suppl table biotinylation

| Column      | Type        | Name          | Size | Score    | P value  | Benj. Hoch | Mean     | Median   |
|-------------|-------------|---------------|------|----------|----------|------------|----------|----------|
| Welch's T-t | Welch's T-t | LFQ intensi   | 565  | 0,985431 | 8,83E-76 | 8,83E-76   | 1,414705 | 1,349841 |
| Welch's T-t | GOMF nam    | transferase   | 18   | -0,46878 | 0,000677 | 0,41383    | 0,659402 | 0,710377 |
| Welch's T-t | Keywords    | S-adenosyl-   | 10   | -0,60598 | 0,00099  | 0,211823   | 0,53908  | 0,5945   |
| Welch's T-t | GOMF nam    | oxidoreduc    | 82   | 0,222842 | 0,001018 | 0,311104   | 1,428967 | 1,393399 |
| Welch's T-t | GOMF nam    | methyltran    | 12   | -0,54929 | 0,001093 | 0,222524   | 0,561365 | 0,534377 |
| Welch's T-t | GOMF nam    | antioxidant   | 8    | 0,659801 | 0,001319 | 0,201426   | 1,9914   | 1,967279 |
| Welch's T-t | GOBP slim   | macromole     | 19   | -0,42037 | 0,001755 | 0,256185   | 0,713293 | 0,651388 |
| Welch's T-t | Keywords    | Methyltran    | 9    | -0,6055  | 0,001783 | 0,190815   | 0,494034 | 0,373154 |
| Welch's T-t | GOMF nam    | oxidoreduc    | 5    | 0,771429 | 0,002929 | 0,357878   | 2,24421  | 2,320288 |
| Welch's T-t | Keywords    | Chaperone     | 16   | 0,429418 | 0,003288 | 0,234568   | 1,664257 | 1,667485 |
| Welch's T-t | GOBP slim   | protein folc  | 10   | 0,520513 | 0,004671 | 0,340983   | 1,812826 | 1,848557 |
| Welch's T-t | GOMF nam    | cis-trans isc | 4    | 0,771893 | 0,00771  | 0,785112   | 2,041758 | 2,090672 |
| Welch's T-t | GOMF nam    | peptidyl-pr   | 4    | 0,771893 | 0,00771  | 0,672953   | 2,041758 | 2,090672 |
| Welch's T-t | Keywords    | Rotamase      | 4    | 0,771893 | 0,00771  | 0,412473   | 2,041758 | 2,090672 |
| Welch's T-t | Keywords    | Membrane      | 67   | -0,19588 | 0,008258 | 0,353429   | 0,993224 | 0,996539 |
| Welch's T-t | GOBP slim   | glycerol etf  | 3    | 0,879643 | 0,008501 | 0,413691   | 2,253869 | 2,207802 |
| Welch's T-t | GOMF nam    | protein me    | 3    | -0,87776 | 0,008642 | 0,660055   | 0,116343 | 0,248043 |
| Welch's T-t | GOBP slim   | RNA proces    | 12   | -0,41929 | 0,012679 | 0,462765   | 0,754836 | 0,57505  |
| Welch's T-t | Keywords    | Electrontra   | 12   | 0,411667 | 0,01439  | 0,513241   | 1,616263 | 1,569683 |
| Welch's T-t | Keywords    | Cellmembr     | 53   | -0,20079 | 0,014929 | 0,456392   | 0,975768 | 0,996539 |
| Welch's T-t | KEGG nam    | Flagellar as  | 13   | -0,39232 | 0,015272 | 0,862885   | 0,819492 | 0,848347 |
| Welch's T-t | Keywords    | Redox-acti    | 5    | 0,626591 | 0,015669 | 0,419135   | 1,894857 | 1,796419 |
| Welch's T-t | Keywords    | Lipidbiosyn   | 12   | 0,404762 | 0,016114 | 0,383148   | 1,616197 | 1,633733 |
| Welch's T-t | Keywords    | Lipidmetab    | 12   | 0,404762 | 0,016114 | 0,344833   | 1,616197 | 1,633733 |
| Welch's T-t | GOMF nam    | tetrapyrrol   | 9    | 0,464201 | 0,016617 | 0,922972   | 1,665639 | 1,518157 |
| Welch's T-t | GOBP slim   | response to   | 4    | 0,692797 | 0,01678  | 0,489982   | 2,178491 | 2,229213 |
| Welch's T-t | GOMF nam    | oxidoreduc    | 6    | 0,5661   | 0,016851 | 0,858002   | 1,855561 | 1,682776 |
| Welch's T-t | GOMF nam    | peroxidase    | 6    | 0,5661   | 0,016851 | 0,792002   | 1,855561 | 1,682776 |
| Welch's T-t | Keywords    | Peroxidase    | 6    | 0,5661   | 0,016851 | 0,327831   | 1,855561 | 1,682776 |
| Welch's T-t | Keywords    | Transmeml     | 45   | -0,21206 | 0,017167 | 0,306141   | 0,971239 | 1,064005 |
| Welch's T-t | GOCC slim   | plasma me     | 53   | -0,19002 | 0,021245 | 0,552373   | 0,986039 | 1,072012 |
| Welch's T-t | GOBP slim   | DNA modif     | 6    | -0,54533 | 0,021322 | 0,518832   | 0,535785 | 0,320809 |
| Welch's T-t | KEGG nam    | Toluene de    | 3    | 0,764927 | 0,022118 | 0,833111   | 2,003444 | 1,976561 |
| Welch's T-t | GOBP slim   | generation    | 15   | -0,33429 | 0,026611 | 0,555025   | 0,797638 | 0,746731 |
| Welch's T-t | Keywords    | Oxidoreduc    | 49   | 0,186198 | 0,029486 | 0,48538    | 1,409156 | 1,365668 |
| Welch's T-t | Keywords    | Disulfidebo   | 10   | 0,398291 | 0,030416 | 0,464926   | 1,594849 | 1,496785 |
| Welch's T-t | GOBP slim   | cell cycle    | 6    | -0,49528 | 0,036533 | 0,666721   | 0,688579 | 0,4894   |
| Welch's T-t | GOBP slim   | cell divisior | 6    | -0,49528 | 0,036533 | 0,592641   | 0,688579 | 0,4894   |
| Welch's T-t | Keywords    | Nucleotide    | 89   | -0,13644 | 0,037165 | 0,530226   | 1,058212 | 1,054768 |
| Welch's T-t | Keywords    | Tricarboxyl   | 7    | 0,452077 | 0,039396 | 0,526927   | 1,79078  | 1,924252 |
| Welch's T-t | GOBP slim   | cellular hor  | 4    | 0,59322  | 0,040584 | 0,592523   | 2,064362 | 2,276902 |
| Welch's T-t | KEGG nam    | Butanoate     | 9    | 0,381697 | 0,048907 | 0,921084   | 1,6325   | 1,924594 |
| Welch's T-t | GOCC slim   | membrane      | 78   | -0,13646 | 0,04903  | 0,637384   | 1,048056 | 1,085968 |
| Welch's T-t | Keywords    | Stressrespc   | 7    | 0,429787 | 0,050177 | 0,63164    | 1,77024  | 2,209612 |
| Welch's T-t | Keywords    | Diaminopir    | 6    | 0,462229 | 0,051007 | 0,606419   | 1,567547 | 1,58817  |
| Welch's T-t | KEGG nam    | Folate bios   | 3    | -0,63893 | 0,055953 | 0,903244   | 0,505492 | 0,370437 |
| Welch's T-t | Keywords    | Cellcycle     | 9    | -0,37    | 0,056255 | 0,633609   | 0,807742 | 0,502505 |
| Welch's T-t | Keywords    | Celldivision  | 9    | -0,37    | 0,056255 | 0,601929   | 0,807742 | 0,502505 |
| Welch's T-t | Keywords    | rRNAproce     | 3    | -0,63705 | 0,05668  | 0,577591   | 0,52867  | 0,695599 |

|                                     |     |          |          |          |          |          |
|-------------------------------------|-----|----------|----------|----------|----------|----------|
| Welch's T-t GOBP slim cell motility | 8   | -0,39063 | 0,05723  | 0,759602 | 0,818823 | 0,836146 |
| Welch's T-t GOBP slim cellular cor  | 8   | -0,39063 | 0,05723  | 0,696302 | 0,818823 | 0,836146 |
| Welch's T-t KEGG name Selenocom     | 4   | 0,541667 | 0,061512 | 0,868856 | 1,801476 | 1,841867 |
| Welch's T-t Keywords Cellinnerm     | 37  | -0,18198 | 0,06211  | 0,604164 | 0,983229 | 1,075962 |
| Welch's T-t Keywords Tryptophar     | 6   | -0,43909 | 0,063775 | 0,593386 | 0,710405 | 0,664713 |
| Welch's T-t Keywords Fattyacidbi    | 4   | 0,534605 | 0,064977 | 0,579374 | 1,765741 | 1,891406 |
| Welch's T-t Keywords Fattyacidm     | 4   | 0,534605 | 0,064977 | 0,556199 | 1,765741 | 1,891406 |
| Welch's T-t GOBP slim RNA modifi    | 7   | -0,40142 | 0,067372 | 0,756644 | 0,76875  | 0,591565 |
| Welch's T-t KEGG name Carbon fixa   | 19  | 0,2425   | 0,071078 | 0,89243  | 1,501785 | 1,422201 |
| Welch's T-t GOBP slim RNA metab     | 45  | -0,15995 | 0,07225  | 0,753465 | 1,019329 | 1,116182 |
| Welch's T-t GOBP slim heterocycle   | 74  | -0,12751 | 0,072311 | 0,703823 | 1,065894 | 1,046828 |
| Welch's T-t KEGG name Nitrogen m    | 9   | 0,34819  | 0,072412 | 0,818258 | 1,512824 | 1,469255 |
| Welch's T-t Keywords Zinc           | 23  | -0,21928 | 0,073358 | 0,603796 | 0,956083 | 0,872905 |
| Welch's T-t GOBP slim cellular am   | 5   | -0,46421 | 0,073403 | 0,669803 | 0,702353 | 0,651388 |
| Welch's T-t Keywords Nuclease       | 3   | -0,59097 | 0,077071 | 0,610859 | 0,612331 | 0,718507 |
| Welch's T-t GOBP slim nucleobase    | 116 | -0,10339 | 0,077835 | 0,668463 | 1,086144 | 1,169352 |
| Welch's T-t KEGG name Two-compe     | 17  | 0,248921 | 0,079248 | 0,814089 | 1,452434 | 1,504244 |
| Welch's T-t KEGG name Citrate cycl  | 15  | 0,264275 | 0,079635 | 0,749893 | 1,54408  | 1,709472 |
| Welch's T-t Keywords Bacterialfla   | 6   | -0,41076 | 0,082891 | 0,633525 | 0,790623 | 0,682093 |
| Welch's T-t KEGG name Valine, leuc  | 4   | 0,497175 | 0,086123 | 0,748604 | 1,74872  | 1,749902 |
| Welch's T-t KEGG name Tryptophar    | 3   | 0,569346 | 0,088523 | 0,714506 | 1,840074 | 2,138139 |
| Welch's T-t KEGG name RNA degra     | 5   | -0,44102 | 0,08897  | 0,670243 | 0,738996 | 0,488208 |
| Welch's T-t KEGG name Lipopolysac   | 10  | -0,3114  | 0,090574 | 0,639678 | 0,819777 | 0,789574 |
| Welch's T-t GOBP slim prosthetic j  | 3   | -0,55806 | 0,095021 | 0,770726 | 0,646343 | 0,527048 |
| Welch's T-t Keywords Glycolysis     | 8   | -0,34055 | 0,097357 | 0,718428 | 0,801317 | 0,760038 |
| Welch's T-t Keywords Transmeml      | 37  | -0,16084 | 0,099191 | 0,707562 | 1,017734 | 1,085848 |
| Welch's T-t GOBP slim pathogene:    | 5   | -0,42348 | 0,102424 | 0,787048 | 0,79959  | 0,851653 |
| Welch's T-t GOCC slim small ribos   | 5   | -0,42008 | 0,105206 | 0,911787 | 0,69797  | 0,699175 |
| Welch's T-t GOBP slim tRNA proce    | 9   | -0,31089 | 0,1087   | 0,793512 | 0,867812 | 0,591565 |
| Welch's T-t GOBP slim tRNA meta     | 28  | -0,17794 | 0,110181 | 0,76602  | 0,991034 | 1,190688 |
| Welch's T-t GOBP slim nitrogen cc   | 192 | -0,0776  | 0,111706 | 0,741322 | 1,116353 | 1,191479 |
| Welch's T-t Keywords GTP-bindin     | 11  | -0,27869 | 0,112413 | 0,776015 | 0,899004 | 0,685563 |
| Welch's T-t GOBP slim cellular nitr | 175 | -0,07971 | 0,11295  | 0,716984 | 1,112712 | 1,178702 |
| Welch's T-t GOBP slim DNA replica   | 9   | 0,30678  | 0,113453 | 0,690175 | 1,453221 | 1,480083 |
| Welch's T-t GOBP slim one-carbor    | 5   | -0,4082  | 0,115418 | 0,674042 | 0,752035 | 0,70089  |
| Welch's T-t GOBP slim nucleoside    | 19  | -0,21045 | 0,11725  | 0,658402 | 0,963989 | 1,052112 |
| Welch's T-t GOCC slim cell part     | 295 | -0,06823 | 0,120609 | 0,783958 | 1,135948 | 1,175433 |
| Welch's T-t KEGG name Cysteine ar   | 11  | 0,272468 | 0,120667 | 0,802078 | 1,418006 | 1,545048 |
| Welch's T-t GOBP slim oligosaccha   | 3   | -0,51857 | 0,12082  | 0,653321 | 0,47784  | 0,229017 |
| Welch's T-t Keywords Ubiquinone     | 4   | -0,44421 | 0,125182 | 0,837156 | 0,709759 | 0,658222 |
| Welch's T-t Keywords Pyrimidinel    | 9   | -0,29635 | 0,126255 | 0,818745 | 0,875867 | 1,126378 |
| Welch's T-t Keywords Queuosinel     | 4   | -0,44209 | 0,126993 | 0,79931  | 0,722562 | 0,743685 |
| Welch's T-t Keywords Elongationf    | 4   | 0,439266 | 0,12944  | 0,791431 | 1,861357 | 2,042499 |
| Welch's T-t Keywords ATP-bindin     | 77  | -0,10523 | 0,131228 | 0,780077 | 1,083629 | 1,159154 |
| Welch's T-t KEGG name Pentose ph    | 11  | 0,263909 | 0,13278  | 0,833565 | 1,457156 | 1,698979 |
| Welch's T-t Keywords Lysinebiosy    | 7   | 0,32847  | 0,134453 | 0,777647 | 1,449618 | 1,587493 |
| Welch's T-t Keywords Kinase         | 14  | -0,23148 | 0,137734 | 0,775659 | 0,954222 | 1,003872 |
| Welch's T-t KEGG name Arginine an   | 15  | 0,223529 | 0,138191 | 0,821873 | 1,425896 | 1,405078 |
| Welch's T-t Keywords Aromaticar     | 9   | -0,28718 | 0,13841  | 0,759478 | 0,875182 | 0,818616 |
| Welch's T-t KEGG name Epithelial c  | 3   | -0,48942 | 0,143155 | 0,808828 | 0,611547 | 0,24476  |

|                       |               |     |          |          |          |          |          |
|-----------------------|---------------|-----|----------|----------|----------|----------|----------|
| Welch's T-t Keywords  | Heme          | 8   | 0,294389 | 0,151836 | 0,812324 | 1,472192 | 1,441913 |
| Welch's T-t KEGG name | Peptidoglyc   | 4   | -0,41243 | 0,154539 | 0,831569 | 0,776098 | 0,554189 |
| Welch's T-t GOBP slim | macromole     | 138 | -0,07708 | 0,159348 | 0,830884 | 1,114875 | 1,190688 |
| Welch's T-t Keywords  | 2Fe-2S        | 3   | 0,464034 | 0,165079 | 0,861631 | 1,685093 | 1,965696 |
| Welch's T-t KEGG name | Taurine anc   | 4   | 0,398305 | 0,169155 | 0,868844 | 1,660999 | 1,710122 |
| Welch's T-t Keywords  | Decarboxyl    | 8   | -0,28125 | 0,170964 | 0,8711   | 0,886157 | 0,885658 |
| Welch's T-t GOBP slim | macromole     | 5   | 0,351627 | 0,175067 | 0,881371 | 1,566546 | 1,611809 |
| Welch's T-t GOBP slim | protein cor   | 5   | 0,351627 | 0,175067 | 0,851992 | 1,566546 | 1,611809 |
| Welch's T-t Keywords  | Transferase   | 91  | -0,08694 | 0,180053 | 0,89608  | 1,091243 | 1,154905 |
| Welch's T-t KEGG name | Phenylalan    | 3   | 0,437706 | 0,190389 | 0,935391 | 1,647007 | 1,621209 |
| Welch's T-t Keywords  | Metallopro    | 3   | -0,43488 | 0,193262 | 0,939956 | 0,770855 | 0,647106 |
| Welch's T-t GOBP slim | multi-orgar   | 7   | -0,2843  | 0,195155 | 0,919119 | 0,939147 | 0,851653 |
| Welch's T-t Keywords  | Pyruvate      | 6   | -0,30642 | 0,195791 | 0,931093 | 0,919141 | 0,729725 |
| Welch's T-t GOBP slim | homeostat     | 8   | 0,26456  | 0,197792 | 0,902428 | 1,60767  | 1,521809 |
| Welch's T-t GOBP slim | polysaccha    | 9   | -0,24925 | 0,198435 | 0,877925 | 0,93535  | 0,710336 |
| Welch's T-t GOBP slim | response to   | 22  | 0,158893 | 0,204133 | 0,876571 | 1,395769 | 1,243411 |
| Welch's T-t Keywords  | Repeat        | 17  | 0,17901  | 0,206896 | 0,962518 | 1,325611 | 1,406724 |
| Welch's T-t KEGG name | Fatty acid b  | 8   | 0,258168 | 0,208844 | 0,983308 | 1,293165 | 1,570829 |
| Welch's T-t Keywords  | Virulence     | 4   | -0,36229 | 0,211082 | 0,961098 | 0,861597 | 0,953211 |
| Welch's T-t Keywords  | 4Fe-4S        | 12  | -0,20881 | 0,214464 | 0,956153 | 0,982888 | 0,672885 |
| Welch's T-t GOBP slim | protein mo    | 6   | -0,29367 | 0,215042 | 0,897034 | 0,826102 | 1,090996 |
| Welch's T-t GOBP slim | cellular aro  | 29  | -0,13435 | 0,220028 | 0,892335 | 1,054992 | 0,994518 |
| Welch's T-t Keywords  | Nucleotidyl   | 12  | -0,20619 | 0,220269 | 0,961992 | 0,947854 | 0,959814 |
| Welch's T-t Keywords  | Aminotrans    | 6   | 0,289896 | 0,221    | 0,945881 | 1,461458 | 1,503983 |
| Welch's T-t Keywords  | LipidAbiosy   | 3   | 0,408557 | 0,221622 | 0,929942 | 1,561078 | 1,471703 |
| Welch's T-t GOBP slim | biosyntheti   | 209 | -0,05746 | 0,226833 | 0,895069 | 1,12526  | 1,181076 |
| Welch's T-t Keywords  | DNAreplica    | 7   | 0,263627 | 0,229637 | 0,945044 | 1,421937 | 1,437346 |
| Welch's T-t GOBP slim | nucleotide-   | 6   | -0,28376 | 0,230933 | 0,887267 | 0,918956 | 0,904346 |
| Welch's T-t GOBP slim | cell wall or  | 6   | -0,26912 | 0,255886 | 0,957932 | 0,915327 | 0,739526 |
| Welch's T-t GOBP slim | cellular cell | 6   | -0,26912 | 0,255886 | 0,933984 | 0,915327 | 0,739526 |
| Welch's T-t GOBP slim | cellular pro  | 347 | -0,0491  | 0,257    | 0,915172 | 1,156755 | 1,200639 |
| Welch's T-t GOBP slim | secretion     | 3   | -0,37189 | 0,265914 | 0,924367 | 0,788757 | 0,469011 |
| Welch's T-t GOMF name | zinc-export   | 1   | 0        | 1        | 1        | 1,423049 | 1,423049 |
| Welch's T-t GOBP slim | translation:  | 1   | 0        | 1        | 1        | 1,497211 | 1,497211 |
| Welch's T-t GOCC slim | tricarboxyli  | 1   | 0        | 1        | 1        | 2,169277 | 2,169277 |
| Welch's T-t KEGG name | Vibrio chol   | 2   | 0,330986 | 1        | 1        | 1,546974 | 1,546974 |
| Welch's T-t Keywords  | Zymogen       | 1   | 0        | 1        | 1        | 0,631787 | 0,631787 |

suppl table proteins showing expected cluster for surface association (Fig2)

| Protein IDs | Majority pr | Gene name |
|-------------|-------------|-----------|
| P64102      | P64102      | jhp_1339  |
| Q9ZJ38      | Q9ZJ38      | jhp_1479  |
| Q9ZJ66      | Q9ZJ66      | secD      |
| Q9ZJ91      | Q9ZJ91      | hsdM_3    |
| Q9ZJC9      | Q9ZJC9      | jhp_1383  |
| Q9ZJD1      | Q9ZJD1      | jhp_1381  |
| Q9ZJE0      | Q9ZJE0      | jhp_1372  |
| Q9ZJL3      | Q9ZJL3      | lon       |
| Q9ZJL8      | Q9ZJL8      | clpX      |
| Q9ZJM9      | Q9ZJM9      | jhp_1276  |
| Q9ZJP5      | Q9ZJP5      | exbD      |
| Q9ZJQ2      | Q9ZJQ2      | dnaJ      |
| Q9ZJT5      | Q9ZJT5      | rpoA      |
| Q9ZJV3      | Q9ZJV3      | pflA      |
| Q9ZJY9      | Q9ZJY9      | carA      |
| Q9ZK82      | Q9ZK82      | atpC      |
| Q9ZKB7      | Q9ZKB7      | jhp_1022  |
| Q9ZKM2      | Q9ZKM2      | ftsZ      |
| Q9ZKM3      | Q9ZKM3      | ftsA      |
| Q9ZKQ1      | Q9ZKQ1      | accD      |
| Q9ZKQ3      | Q9ZKQ3      | jhp_0882  |
| Q9ZKY5      | Q9ZKY5      | pgbB      |
| Q9ZL06      | Q9ZL06      | jhp_0776  |
| Q9ZL29      | Q9ZL29      | motB      |
| Q9ZL35      | Q9ZL35      | fliL      |
| Q9ZL62      | Q9ZL62      | jhp_0718  |
| Q9ZL83      | Q9ZL83      | rny       |
| Q9ZLD9      | Q9ZLD9      | gyrA      |
| Q9ZLM7      | Q9ZLM7      | jhp_0552  |
| Q9ZLP8      | Q9ZLP8      | jhp_0530  |
| Q9ZLP9      | Q9ZLP9      | tonB_1    |
| Q9ZLQ8      | Q9ZLQ8      | jhp_0520  |
| Q9ZLS6      | Q9ZLS6      | jhp_0501  |
| Q9ZLT1      | Q9ZLT1      | cagA      |
| Q9ZLU0      | Q9ZLU0      | cagN      |
| Q9ZLU7      | Q9ZLU7      | orf17     |
| Q9ZLV3      | Q9ZLV3      | virD4     |
| Q9ZLV5      | Q9ZLV5      | orf8      |
| Q9ZLV7      | Q9ZLV7      | orf6      |
| Q9ZLY2      | Q9ZLY2      | jhp_0444  |
| Q9ZM23      | Q9ZM23      | dnaJ_1    |
| Q9ZM24      | Q9ZM24      | jhp_0399  |
| Q9ZM54      | Q9ZM54      | jhp_0369  |
| Q9ZM66      | Q9ZM66      | ftsH      |
| Q9ZM93      | Q9ZM93      | lepA      |
| Q9ZMA2      | Q9ZMA2      | jhp_0320  |
| Q9ZMI7      | Q9ZMI7      | jhp_0233  |
| Q9ZML8      | Q9ZML8      | jhp_0200  |
| Q9ZMP5      | Q9ZMP5      | jhp_0173  |

|        |        |          |
|--------|--------|----------|
| Q9ZMP9 | Q9ZMP9 | jhp_0169 |
| Q9ZMT2 | Q9ZMT2 | jhp_0136 |
| Q9ZMT3 | Q9ZMT3 | fixP     |
| Q9ZMY7 | Q9ZMY7 | jhp_0075 |
| Q9ZN48 | Q9ZN48 | jhp_0011 |
| P0A0V1 | P0A0V1 | lpp20    |
| Q9ZJA0 | Q9ZJA0 | jhp_1413 |
| Q9ZJF6 | Q9ZJF6 | jhp_1356 |
| Q9ZJF7 | Q9ZJF7 | jhp_1355 |
| Q9ZJG2 | Q9ZJG2 | jhp_1350 |
| Q9ZJY3 | Q9ZJY3 | babB     |
| Q9ZK39 | Q9ZK39 | jhp_1103 |
| Q9ZK87 | Q9ZK87 | jhp_1054 |
| Q9ZKG1 | Q9ZKG1 | jhp_0975 |
| Q9ZKV2 | Q9ZKV2 | babA     |
| Q9ZL07 | Q9ZL07 | jhp_0775 |
| Q9ZLC5 | Q9ZLC5 | dnaX     |
| Q9ZLJ9 | Q9ZLJ9 | jhp_0580 |
| Q9ZLN5 | Q9ZLN5 | jhp_0543 |
| Q9ZLV0 | Q9ZLV0 | 14       |
| Q9ZLW8 | Q9ZLW8 | pgbA     |
| Q9ZM26 | Q9ZM26 | fur      |
| Q9ZMU8 | Q9ZMU8 | jhp_0119 |
| Q9ZMX0 | Q9ZMX0 | jhp_0095 |



suppl table biotinylation 2D annotation

| Welch's T-test | Welch's T-test | Type           | Size | P value     | Benj. Hoch. | FI Names                                     |
|----------------|----------------|----------------|------|-------------|-------------|----------------------------------------------|
| #!{Type}E      | E              | C              | N    | N           | N           | T                                            |
| 0.9660678      | -0.1575424     | Welch's T-test | 590  |             | 0           | 0 +                                          |
| -0.08416786    | 0.8374318      | Welch's T-test | 170  |             | 0           | 0 +                                          |
| 0.9660678      | -0.1575424     | Welch's T-test | 590  |             | 0           | 0 LFQ intensity posBU_LFQ intensity negBU    |
| -0.08416786    | 0.8374318      | Welch's T-test | 170  |             | 0           | 0 LFQ intensity TF_10_LFQ intensity CF_10    |
| 0.0245417      | 0.3727679      | GOCC slim na   | 94   | 1,00E+09    | 0.000301311 | membrane                                     |
| 0.01561018     | -0.2013623     | GOMF name      | 516  | 8,00E+09    | 0.058076257 | catalytic activity                           |
| -0.1197737     | -0.1566667     | GOBP slim na   | 270  | 0.000142420 | 0.022359954 | cellular nitrogen compound metabolic process |
| 0.3298151      | -0.1147477     | GOMF name      | 92   | 0.000156044 | 0.056644200 | oxidoreductase activity                      |
| -0.008392503   | 0.3521655      | Keywords       | 79   | 0.000164516 | 0.037345177 | Membrane                                     |
| -0.05085107    | 0.4387659      | Keywords       | 50   | 0.000177719 | 0.020171201 | Ribonucleoprotein                            |
| -0.06742676    | 0.4356533      | GOCC slim na   | 51   | 0.000178191 | 0.002672875 | ribonucleoprotein complex                    |
| 0.0297379      | 0.3825779      | GOCC slim na   | 62   | 0.000182241 | 0.001822416 | plasma membrane                              |
| -0.2863262     | 0.3332616      | GOMF name      | 60   | 0.000185193 | 0.044816823 | nucleoside-triphosphatase activity           |
| -0.4485081     | -0.0750212     | GOBP slim na   | 41   | 0.000201568 | 0.015823126 | macromolecule modification                   |
| -0.1053493     | -0.154885      | GOBP slim na   | 291  | 0.000231189 | 0.012098926 | nitrogen compound metabolic process          |
| -0.0133808     | 0.3777673      | Keywords       | 64   | 0.000253657 | 0.019193400 | Cellmembrane                                 |
| 0.02203882     | 0.1834454      | GOCC slim na   | 387  | 0.000256435 | 0.001923265 | cell part                                    |
| -0.04485813    | 0.4190996      | GOMF name      | 52   | 0.000263734 | 0.047867886 | structural molecule activity                 |
| -0.03853912    | 0.4286148      | GOMF name      | 49   | 0.000279203 | 0.040540389 | structural constituent of ribosome           |
| -0.03853912    | 0.4286148      | KEGG name      | 49   | 0.000279203 | 0.033225250 | Ribosome                                     |
| -0.03853912    | 0.4286148      | Keywords       | 49   | 0.000279203 | 0.015844814 | Ribosomalprotein                             |
| -0.1691597     | 0.2249149      | GOMF name      | 148  | 0.000335051 | 0.040541271 | nucleic acid binding                         |
| 0.07388116     | -0.2216374     | GOBP slim na   | 214  | 0.000343814 | 0.013494708 | small molecule metabolic process             |
| -0.0937693     | 0.3180181      | GOCC slim na   | 86   | 0.000471531 | 0.002829187 | macromolecular complex                       |
| 0.03299925     | 0.4697382      | Keywords       | 35   | 0.000481709 | 0.021869627 | rRNA-binding                                 |
| 0.01426741     | 0.4634871      | GOMF name      | 36   | 0.000545125 | 0.056537350 | rRNA binding                                 |
| -0.4775        | -0.1009722     | GOBP slim na   | 30   | 0.000556266 | 0.017466761 | RNA processing                               |

suppl table biotinylation 2D annotation

|              |             |              |     |             |             |                                                      |
|--------------|-------------|--------------|-----|-------------|-------------|------------------------------------------------------|
| 0.00150364   | 0.3697373   | GOBP slim na | 54  | 0.000884585 | 0.023146649 | translation                                          |
| -0.5311795   | -0.06273478 | GOBP slim na | 22  | 0.001381422 | 0.030983341 | RNA modification                                     |
| -0.2184632   | 0.2908342   | GOMF name    | 64  | 0.001420118 | 0.128875728 | pyrophosphatase activity                             |
| -0.003171247 | 0.3862195   | GOCC slim na | 44  | 0.001681138 | 0.008405692 | intracellular non-membrane-bounded organelle         |
| -0.003171247 | 0.3862195   | GOCC slim na | 44  | 0.001681138 | 0.007204879 | intracellular organelle                              |
| -0.003171247 | 0.3862195   | GOCC slim na | 44  | 0.001681138 | 0.006304269 | organelle                                            |
| -0.5098031   | 0.05177202  | Keywords     | 25  | 0.001774816 | 0.067147235 | S-adenosyl-L-methionine                              |
| -0.2163026   | 0.2757773   | GOMF name    | 66  | 0.001848307 | 0.149096774 | hydrolase activity, acting on acid anhydrides        |
| -0.2163026   | 0.2757773   | GOMF name    | 66  | 0.001848307 | 0.134187096 | hydrolase activity, acting on acid anhydrides,       |
| 0.2396336    | -0.5689739  | Keywords     | 19  | 0.001898888 | 0.061578251 | Pyridoxalphosphate                                   |
| -0.08336412  | 0.3463102   | Keywords     | 55  | 0.002086422 | 0.059202245 | RNA-binding                                          |
| -0.1970909   | 0.113888    | GOMF name    | 165 | 0.002189688 | 0.144519423 | purine ribonucleoside triphosphate binding           |
| -0.1970909   | 0.113888    | GOMF name    | 165 | 0.002189688 | 0.132476137 | purine ribonucleotide binding                        |
| -0.1970909   | 0.113888    | GOMF name    | 165 | 0.002189688 | 0.122285665 | ribonucleotide binding                               |
| -0.1983677   | 0.1144772   | Keywords     | 151 | 0.002955765 | 0.074550970 | Nucleotide-binding                                   |
| -0.1677739   | 0.1055434   | GOBP slim na | 221 | 0.003013799 | 0.059145814 | macromolecule metabolic process                      |
| -0.4743058   | 0.08003511  | GOMF name    | 26  | 0.003187388 | 0.165288848 | methyltransferase activity                           |
| -0.1891011   | 0.1098666   | GOMF name    | 166 | 0.003200447 | 0.154901635 | purine nucleotide binding                            |
| -0.1626604   | -0.06980032 | GOBP slim na | 189 | 0.003238618 | 0.056495905 | nucleobase-containing compound metabolic process     |
| -0.3353489   | 0.1525011   | GOBP slim na | 47  | 0.004177592 | 0.065588205 | DNA metabolic process                                |
| -0.4932382   | 0.0798272   | Keywords     | 22  | 0.004713481 | 0.106996031 | Methyltransferase                                    |
| -0.3969207   | -0.02022443 | GOMF name    | 32  | 0.004930683 | 0.223729785 | transferase activity, transferring one-carbon groups |
| -0.2556977   | 0.1963151   | GOMF name    | 63  | 0.005058160 | 0.216013223 | DNA binding                                          |
| -0.06120854  | -0.2089121  | GOBP slim na | 104 | 0.005585308 | 0.079717586 | heterocycle metabolic process                        |
| 0.01859179   | 0.5066399   | GOBP slim na | 19  | 0.005695089 | 0.074510748 | protein transport                                    |
| -0.1021729   | -0.1367073  | GOMF name    | 159 | 0.006973974 | 0.281283657 | transferase activity                                 |
| 0.1327317    | -0.243421   | GOBP slim na | 78  | 0.007033062 | 0.084937760 | cellular amino acid metabolic process                |
| -0.1874635   | 0.091427    | GOMF name    | 146 | 0.007118602 | 0.272005555 | adenyl ribonucleotide binding                        |
| -0.1874635   | 0.091427    | GOMF name    | 146 | 0.007118602 | 0.258405277 | ATP binding                                          |
| 0.001382132  | 0.354268    | GOCC slim na | 38  | 0.007201975 | 0.024006584 | ribosome                                             |

suppl table biotinylation 2D annotation

|             |             |              |     |                         |                                                             |
|-------------|-------------|--------------|-----|-------------------------|-------------------------------------------------------------|
| 0.7367617   | -0.3612525  | GOMF name    | 8   | 0.007531379;0.260370565 | antioxidant activity                                        |
| -0.2671507  | 0.2920791   | GOMF name    | 37  | 0.007781182;0.256779007 | ATPase activity                                             |
| 0.06350872  | 0.2223005   | GOBP slim na | 83  | 0.007903297;0.088629840 | protein metabolic process                                   |
| -0.2270665  | -0.06823516 | GOBP slim na | 77  | 0.008181818;0.085636364 | RNA metabolic process                                       |
| -0.01592005 | 0.3244915   | Keywords     | 45  | 0.008201479;0.169248706 | Cellinnermembrane                                           |
| -0.03988557 | -0.1204057  | GOBP slim na | 469 | 0.008255066;0.081002837 | metabolic process                                           |
| 0.01592831  | 0.3180377   | Keywords     | 44  | 0.008959440;0.169482751 | Transmembranehelix                                          |
| -0.1025948  | -0.1443448  | Keywords     | 135 | 0.008990352;0.156985383 | Transferase                                                 |
| -0.5458462  | 0.1197265   | GOMF name    | 15  | 0.009645653;0.304467140 | S-adenosylmethionine-dependent methyltransferase activity   |
| -0.5716873  | 0.2380128   | GOMF name    | 13  | 0.009658833;0.292179721 | endonuclease activity                                       |
| -0.178638   | 0.08707967  | GOMF name    | 147 | 0.010158548;0.295004240 | adenyl nucleotide binding                                   |
| -0.4028926  | 0.2707551   | GOMF name    | 22  | 0.010483479;0.292731000 | nuclease activity                                           |
| 0.1199892   | -0.1965133  | GOBP slim na | 105 | 0.011009080;0.101672093 | organic acid metabolic process                              |
| -0.1831603  | 0.09214523  | Keywords     | 132 | 0.011398105;0.184812144 | ATP-binding                                                 |
| 0.08581772  | -0.2189017  | GOBP slim na | 93  | 0.011774020;0.102695624 | amine metabolic process                                     |
| 0.06510154  | -0.3193684  | GOMF name    | 43  | 0.011834898;0.318227258 | lyase activity                                              |
| -0.02822437 | 0.2761701   | GOBP slim na | 57  | 0.012478341;0.103110504 | establishment of localization                               |
| -0.02822437 | 0.2761701   | GOBP slim na | 57  | 0.012478341;0.097954979 | transport                                                   |
| 0.4663932   | -0.3314188  | KEGG name    | 15  | 0.012644243;0.752332470 | Arginine and proline metabolism                             |
| 0.4915555   | -0.2720684  | KEGG name    | 15  | 0.013219162;0.524360130 | Citrate cycle (TCA cycle)                                   |
| -0.06302368 | 0.2416175   | GOMF name    | 75  | 0.013243260;0.343378821 | RNA binding                                                 |
| 0.2719956   | -0.04939734 | Keywords     | 57  | 0.013978367;0.211539299 | Oxidoreductase                                              |
| -0.5230755  | 0.3945585   | Keywords     | 11  | 0.014501622;0.205741768 | Nuclease                                                    |
| 0.03365446  | -0.2455978  | GOBP slim na | 68  | 0.016176324;0.120937285 | nucleobase-containing small molecule metabolic process      |
| -0.6183674  | 0.1418367   | GOBP slim na | 10  | 0.016430198;0.117251871 | rRNA processing                                             |
| -0.3791724  | -0.1832419  | GOBP slim na | 18  | 0.016956707;0.115747962 | tRNA processing                                             |
| 0.7989848   | -0.4919797  | GOMF name    | 5   | 0.016969360;0.424819160 | oxidoreductase activity, acting on a sulfur group of donors |
| -0.4325615  | -0.08457772 | GOBP slim na | 17  | 0.019012659;0.124374480 | DNA repair                                                  |
| -0.4325615  | -0.08457772 | GOBP slim na | 17  | 0.019012659;0.119399501 | response to DNA damage stimulus                             |
| -0.05680381 | -0.09482919 | GOBP slim na | 433 | 0.019178053;0.115805937 | cellular metabolic process                                  |

suppl table biotinylation 2D annotation

|              |             |              |     |                          |                                                         |
|--------------|-------------|--------------|-----|--------------------------|---------------------------------------------------------|
| 0.0792181    | 0.4207819   | Keywords     | 18  | 0.019627793; 0.262088768 | Proteintransport                                        |
| -0.4745935   | -0.50271    | Keywords     | 6   | 0.020603839; 0.259837310 | Queuosinebiosynthesis                                   |
| -0.001496638 | 0.2620141   | Keywords     | 52  | 0.021437881; 0.256126269 | Transmembrane                                           |
| 0.3679381    | 0.1245361   | Keywords     | 20  | 0.022373814; 0.253942797 | Chaperone                                               |
| -0.6242362   | 0.3039715   | Keywords     | 8   | 0.023905840; 0.258410755 | Zinc-finger                                             |
| 0.722561     | -0.3252032  | KEGG name    | 6   | 0.024791863; 0.737557941 | Glutathione metabolism                                  |
| 0.01954757   | -0.294346   | Keywords     | 39  | 0.025701658; 0.265194383 | Lyase                                                   |
| 0.399729     | 0.5335366   | Keywords     | 6   | 0.026145653; 0.258046233 | Lipoprotein                                             |
| 0.6044852    | -0.1170008  | GOMF name    | 9   | 0.026179659; 0.633547764 | heme binding                                            |
| 0.6044852    | -0.1170008  | GOMF name    | 9   | 0.026179659; 0.613110739 | tetrapyrrole binding                                    |
| 0.4973624    | -0.04621683 | Keywords     | 13  | 0.027365161; 0.258828814 | Electrontransport                                       |
| 0.3869478    | -0.129687   | KEGG name    | 21  | 0.029116379; 0.692969823 | Carbon fixation pathways in prokaryotes                 |
| 0.8047667    | -0.5263692  | GOBP slim na | 4   | 0.029132515; 0.169400184 | response to oxidative stress                            |
| 0.2251624    | -0.436718   | GOMF name    | 15  | 0.030158711; 0.684225774 | pyridoxal phosphate binding                             |
| 0.2251624    | -0.436718   | GOMF name    | 15  | 0.030158711; 0.663491660 | vitamin B6 binding                                      |
| 0.08020661   | -0.1717562  | GOBP slim na | 110 | 0.030500493; 0.171020622 | cellular ketone metabolic process                       |
| -0.2316051   | -0.1210332  | Keywords     | 39  | 0.030604727; 0.277890929 | Zinc                                                    |
| 0.2987954    | -0.4397292  | KEGG name    | 13  | 0.030977981; 0.614396631 | Pentose phosphate pathway                               |
| -0.1483403   | -0.2807214  | GOBP slim na | 26  | 0.031016689; 0.167917937 | nucleoside metabolic process                            |
| -0.6378433   | 0.3062055   | Keywords     | 7   | 0.031152968; 0.271989382 | Endonuclease                                            |
| 0.507551     | -0.3204082  | KEGG name    | 10  | 0.031562278; 0.536558729 | Nitrogen metabolism                                     |
| 0.1009483    | 0.193293    | Keywords     | 56  | 0.032452064; 0.272837724 | Transport                                               |
| 0.81643      | -0.4295132  | GOMF name    | 4   | 0.034339013; 0.733238928 | cis-trans isomerase activity                            |
| 0.81643      | -0.4295132  | GOMF name    | 4   | 0.034339013; 0.712289244 | peptidyl-prolyl cis-trans isomerase activity            |
| 0.81643      | -0.4295132  | Keywords     | 4   | 0.034339013; 0.278391285 | Rotamase                                                |
| -0.3137625   | 0.6177881   | GOCC slim na | 7   | 0.035875456; 0.107626369 | small ribosomal subunit                                 |
| -0.1269727   | 0.07194263  | GOMF name    | 196 | 0.036248748; 0.731016421 | nucleotide binding                                      |
| 0.6842818    | -0.2560976  | GOMF name    | 6   | 0.036552558; 0.717220471 | oxidoreductase activity, acting on peroxide as acceptor |
| 0.6842818    | -0.2560976  | GOMF name    | 6   | 0.036552558; 0.698346248 | peroxidase activity                                     |
| 0.6842818    | -0.2560976  | Keywords     | 6   | 0.036552558; 0.286118302 | Peroxidase                                              |

suppl table biotinylation 2D annotation

|             |              |              |    |             |             |                                              |
|-------------|--------------|--------------|----|-------------|-------------|----------------------------------------------|
| -0.5179592  | 0.2414286    | GOMF name    | 10 | 0.037495782 | 0.697998416 | helicase activity                            |
| -0.5179592  | 0.2414286    | Keywords     | 10 | 0.037495782 | 0.283718089 | Helicase                                     |
| 0.1927298   | -0.3831733   | GOMF name    | 18 | 0.038256100 | 0.694348228 | vitamin binding                              |
| 0.3296165   | 0.06488018   | GOBP slim na | 23 | 0.038325678 | 0.200571050 | response to chemical stimulus                |
| -0.07394013 | -0.2345791   | GOBP slim na | 42 | 0.039493113 | 0.200013510 | cellular aromatic compound metabolic process |
| 0.5442293   | -0.2313965   | KEGG name    | 9  | 0.039963568 | 0.594458083 | Butanoate metabolism                         |
| -0.4299898  | 0.4732688    | GOMF name    | 8  | 0.042877074 | 0.759237956 | N-methyltransferase activity                 |
| -0.5222449  | 0.09918367   | Keywords     | 10 | 0.043110637 | 0.315681123 | rRNA processing                              |
| 0.4291498   | 0.9787449    | GOMF name    | 2  | 0.043222023 | 0.747123543 | iron ion transmembrane transporter activity  |
| 0.1074879   | 0.2949448    | Keywords     | 24 | 0.043634741 | 0.309533950 | Repeat                                       |
| 0.620404    | -0.1187327   | Keywords     | 7  | 0.044079988 | 0.303216893 | Tricarboxylic acid cycle                     |
| -0.5322233  | -0.003058104 | GOMF name    | 9  | 0.045805166 | 0.773361648 | RNA methyltransferase activity               |
| 0.3519316   | 0.1600684    | Keywords     | 15 | 0.045872554 | 0.306266762 | Signal                                       |
| -0.2729469  | -0.1365597   | GOMF name    | 24 | 0.046364905 | 0.765020940 | zinc ion binding                             |
| 0.5894309   | -0.4109079   | Keywords     | 6  | 0.046833366 | 0.303747833 | Diaminopimelate biosynthesis                 |
| 0.28        | 0.6004061    | Keywords     | 5  | 0.047314886 | 0.298346644 | Palmitate                                    |
